# Supplementary material for: Comparative genomics of flowering behavior in Cannabis sativa
Source: Front Plant Sci. 2023 Jul 27;14:1227898. doi: 10.3389/fpls.2023.1227898 (PMC10421669; doi:10.3389/fpls.2023.1227898)
Supplement: Supplementary Table 1 — C. sativa flowering genes. [file Table_1.xlsx]

## Sheet: Csativa_Flowering_Genes
At_AGI_Protein	At Name	At Short Name	FlorID Keyword	Cs_Symbol	Cs_product_accession	Related_Accession_Transcript	cs10/CRDRx chromosome	Genomic_Accession	Start	End	Strand	Cs_name	NOTES	Alternative Name	Ref
AT4G18960.1	AGAMOUS K-BOX REGION AND MADS-BOX TRANSCRIPTION FACTOR FAMILY PROTEIN	AG	Flower development and meristem identity Gibberellins	LOC115697576	XP_030480504.1	XM_030624644.1	7	NC_044378.1	69027898	69035878	-	floral homeotic protein AGAMOUS	AG
AT2G42830.2	AGAMOUS LIKE 5	AGL5	Photoperiodism, light perception and signalling	LOC115698701	XP_030481705.1	XM_030625845.1	8	NC_044379.1	59695920	59702375	-	agamous-like MADS-box protein MADS1	AG
AT1G71692.1	AGAMOUS-LIKE 12, XAANTAL1	AGL12	Photoperiodism, light perception and signalling	LOC115699728	XP_030483127.1	XM_030627267.1	X	NC_044370.1	99684642	99688734	-	agamous-like MADS-box protein AGL12	AGL12
AT5G13790.1	AGAMOUS-LIKE 15	AGL15	Photoperiodism, light perception and signalling	LOC115710309	XP_030494537.1	XM_030638677.1	3	NC_044372.1	743515	746790	+	agamous-like MADS-box protein AGL15	AGL15
AT3G57390.1	AGAMOUS-LIKE 18	AGL18	Photoperiodism, light perception and signalling	LOC115710309	XP_030494537.1	XM_030638677.1	3	NC_044372.1	743515	746790	+	agamous-like MADS-box protein AGL15	AGL15
AT3G57230.1	AGAMOUS-LIKE 16	AGL16	General	LOC115697575	XP_030480508.1	XM_030624648.1	X	NC_044370.1	90566667	90600845	-	MADS-box transcription factor 23 isoform X1	AGL17
AT2G22630.1	AGAMOUS-LIKE 17	AGL17	Photoperiodism, light perception and signalling	LOC115712534	XP_030496683.1	XM_030640823.1	4	NC_044373.1	72060135	72067800	+	MADS-box transcription factor 23 isoform X1	AGL17
None	NA	NA	General	LOC115718840	XP_030503511.1	XM_030647651.1	2	NC_044375.1	5336304	5346161	-	MADS-box transcription factor 23	AGL17
None	NA	NA	General	LOC115720817	XP_030505853.1	XM_030649993.1	2	NC_044375.1	5258933	5278839	-	MADS-box transcription factor ANR1-like	AGL17
AT2G45650.1	AGAMOUS-LIKE 6	AGL6	General	LOC115704294	XP_030487367.1	XM_030631507.1	1	NC_044371.1	87513456	87519062	-	agamous-like MADS-box protein MADS3	AGL6
None	NA	NA	General	LOC115716337	XP_030500965.1	XM_030645105.1	5	NC_044374.1	56190982	56208881	-	agamous-like MADS-box protein MADS3	AGL6
AT3G54340.1	APETALA 3	AP3	Photoperiodism, light perception and signalling	LOC115714657	XP_030499268.1	XM_030643408.1	4	NC_044373.1	85338917	85345731	+	agamous-like MADS-box protein TM6	AP3
AT2G38880.1	NUCLEAR FACTOR Y, SUBUNIT B1, HEME ACTIVATOR PROTEIN (YEAST) HOMOLOG 3A	NF-YB1, HAP3A	Photoperiodism, light perception and signalling	LOC115706176	XP_030489582.1	XM_030633722.1	1	NC_044371.1	19691941	19696529	+	nuclear transcription factor Y subunit B-1 isoform X1	Autoflower candidate	NFYB1	Toth et al., 2022
AT5G60100.1	PSEUDO-RESPONSE REGULATOR 3	PRR3	Circadian Clock	LOC115705128	XP_030488228.1	XM_030632368.1	1	NC_044371.1	19987126	19991754	+	LOW QUALITY PROTEIN: two-component response regulator-like PRR37	Autoflower candidate	PRR37
AT5G02810.1	PSEUDO-RESPONSE REGULATOR 7	PRR7	Circadian Clock	LOC115705128	XP_030488228.1	XM_030632368.1	1	NC_044371.1	19987126	19991754	+	LOW QUALITY PROTEIN: two-component response regulator-like PRR37	Autoflower candidate	PRR37	Chen et al., 2022
None	NA	NA	General	LOC115706264	XP_030489712.1	XM_030633852.1	1	NC_044371.1	19803137	19814896	-	LOW QUALITY PROTEIN: regulator of nonsense transcripts UPF2	Autoflower candidate	UPF2	Patent
None	NA	NA	General	LOC115708151	XP_030492220.1	XM_030636360.1	1	NC_044371.1	19726857	19728519	-	floral homeotic protein APETALA 2 isoform X1	Autoflower candidate	RAP2-7/TOE1	Patent
AT5G23260.1	TRANSPARENT TESTA16, AGAMOUS-LIKE 32	ABS	Flower development and meristem identity	LOC115700907	XP_030484436.1	XM_030628576.1	8	NC_044379.1	35928288	35930515	-	MADS-box protein FBP24	Bsister
None	NA	NA	Flower development and meristem identity	LOC115707234	XP_030490979.1	XM_030635119.1	1	NC_044371.1	65903566	65906936	-	MADS-box protein FBP24-like isoform X1	Bsister
AT5G24930.1	ATCOL4	ATCOL4	Photoperiodism, light perception and signalling	LOC115707536	XP_030491403.1	XM_030635543.1	X	NC_044370.1	23659853	23660953	+	zinc finger protein CONSTANS-LIKE 4	CO	CsCOL7	Pan et al., (2021)
AT3G21880.1	B-BOX DOMAIN PROTEIN 10	BBX10	Photoperiodism, light perception and signalling	LOC115700838	XP_030484363.1	XM_030628503.1	8	NC_044379.1	53091654	53093183	+	zinc finger protein CONSTANS-LIKE 12	CO	CsCOL12	Pan et al., (2021)
AT1G68520.1	B-BOX DOMAIN PROTEIN 14	BBX14	Photoperiodism, light perception and signalling	LOC115711183	XP_030495370.1	XM_030639510.1	3	NC_044372.1	94040479	94042482	+	zinc finger protein CONSTANS-LIKE 6-like	CO	CsCOL13	Pan et al., (2021)
AT5G54470.1	B-BOX DOMAIN PROTEIN 29	BBX29	Photoperiodism, light perception and signalling	LOC115703699	XP_030486795.1	XM_030630935.1	1	NC_044371.1	95494728	95495397	+	zinc finger protein CONSTANS-LIKE 1	CO	CsCOL8	Pan et al., (2021)
AT1G28050.1	B-BOX TYPE ZINC FINGER PROTEIN WITH CCT DOMAIN	BBX13	Photoperiodism, light perception and signalling	LOC115697429	XP_030480288.1	XM_030624428.1	7	NC_044378.1	22326809	22328541	-	zinc finger protein CONSTANS-LIKE 14 isoform X1	CO	CsCOL3	Pan et al., (2021)
AT5G15840.1	CONSTANS	CO	Photoperiodism, light perception and signalling	LOC115700744	XP_030484238.1	XM_030628378.1	8	NC_044379.1	55271233	55272800	+	zinc finger protein CONSTANS-LIKE 2	CO	CsCOL10	Pan et al., (2021)
AT5G57660.1	CONSTANS-LIKE 5	COL5	Photoperiodism, light perception and signalling	LOC115725326	XP_030510667.1	XM_030654807.1	6	NC_044377.1	4162347	4163608	+	zinc finger protein CONSTANS-LIKE 5	CO	CsCOL4	Pan et al., (2021)
AT3G07650.1	CONSTANS-LIKE 9	COL9	Photoperiodism, light perception and signalling	LOC115700798	XP_030484310.1	XM_030628450.1	8	NC_044379.1	43008204	43011950	-	zinc finger protein CONSTANS-LIKE 10	CO	CsCOL9	Pan et al., (2021)
AT5G23280.1	TCP FAMILY TRANSCRIPTION FACTOR	AtTCP7	Photoperiodism, light perception and signalling	LOC115722074	XP_030507083.1	XM_030651223.1	X	NC_044370.1	11668613	11671610	-	zinc finger protein CONSTANS-LIKE 13 isoform X1	CO	CsCOL1	Pan et al., (2021)
None	NA	NA	Photoperiodism, light perception and signalling	LOC115700712	XP_030484201.1	XM_030628341.1	8	NC_044379.1	53716457	53717280	+	zinc finger protein CONSTANS-LIKE 1	CO	CsCOL11	Pan et al., (2021)
None	NA	NA	Photoperiodism, light perception and signalling	LOC115711648	XP_030495880.1	XM_030640020.1	3	NC_044372.1	94140459	94142576	+	zinc finger protein CONSTANS-LIKE 6	CO	CsCOL6	Pan et al., (2021)
None	NA	NA	Photoperiodism, light perception and signalling	LOC115714019	XP_030498388.1	XM_030642528.1	4	NC_044373.1	851937	856928	-	zinc finger protein CONSTANS-LIKE 10	CO	CsCOL2	Pan et al., (2021)
None	NA	NA	Photoperiodism, light perception and signalling	LOC115714839	XP_030499459.1	XM_030643599.1	4	NC_044373.1	1761270	1763949	-	zinc finger protein CONSTANS-LIKE 16	CO	CsCOL5	Pan et al., (2021)
AT5G61850.1	LEAFY	LFY	Flower development and meristem identity Flowering time integrator	LOC115695615	XP_030478531.1	XM_030622671.1	6	NC_044377.1	79285628	79286144	+	floricaula/leafy homolog 1	CsLFY	CsLFY	Spitzer-Ramon et al., 2022
AT3G54990.1	SCHLAFMUTZE	SMZ	Aging Photoperiodism, light perception and signalling	LOC115718941	XP_030503629.1	XM_030647769.1	2	NC_044375.1	92102031	92105324	+	ethylene-responsive transcription factor RAP2-7 isoform X2	CsRAP2–7 (TOE1)	CsRAP2–7 (TOE1)	Spitzer-Ramon et al., 2022
AT2G39250.1	SCHNARCHZAPFEN	SNZ	Aging Photoperiodism, light perception and signalling	LOC115718941	XP_030503629.1	XM_030647769.1	2	NC_044375.1	92102031	92105324	+	ethylene-responsive transcription factor RAP2-7 isoform X2	CsRAP2–7 (TOE1)	CsRAP2–7 (TOE1)	Spitzer-Ramon et al., 2022
AT2G28550.1	TARGET OF EARLY ACTIVATION TAGGED 1 , RELATED TO AP2.7	TOE1, RAP2.7	Aging Photoperiodism, light perception and signalling	LOC115718941	XP_030503629.1	XM_030647769.1	2	NC_044375.1	92102031	92105324	+	ethylene-responsive transcription factor RAP2-7 isoform X2	CsRAP2–7 (TOE1)	CsRAP2–7 (TOE1)	Spitzer-Ramon et al., 2022
AT5G60120.1	TARGET OF EARLY ACTIVATION TAGGED 2	TOE2	Aging Photoperiodism, light perception and signalling	LOC115718941	XP_030503629.1	XM_030647769.1	2	NC_044375.1	92102031	92105324	+	ethylene-responsive transcription factor RAP2-7 isoform X2	CsRAP2–7 (TOE1)	CsRAP2–7 (TOE1)	Spitzer-Ramon et al., 2022
None	NA	NA	Aging Photoperiodism, light perception and signalling Hormones	LOC115700536	XP_030483952.1	XM_030628092.1	8	NC_044379.1	33183224	33186813	-	squamosa promoter-binding-like protein 6 isoform X1	CsSPL	CsSPL	Spitzer-Ramon et al., 2022
None	NA	NA	Aging Photoperiodism, light perception and signalling Hormones	LOC115711544	XP_030495788.1	XM_030639928.1	X	NC_044370.1	10366882	10372455	-	squamosa promoter-binding-like protein 1	CsSPL	CsSPL	Spitzer-Ramon et al., 2022
None	NA	NA	Aging Photoperiodism, light perception and signalling Hormones	LOC115723060	XP_030508327.1	XM_030652467.1	9	NC_044376.1	3863393	3867489	-	squamosa promoter-binding-like protein 12	CsSPL	CsSPL	Spitzer-Ramon et al., 2022
AT1G53160.1	SQUAMOSA PROMOTER BINDING PROTEIN-LIKE 4	SPL4	Aging Photoperiodism, light perception and signalling Hormones	LOC115700826	XP_030484347.1	XM_030628487.1	8	NC_044379.1	50718084	50719425	+	squamosa promoter-binding protein 1 isoform X1	CsSPL1	CsSPL1	Spitzer-Ramon et al., 2022
AT3G15270.1	SQUAMOSA PROMOTER BINDING PROTEIN-LIKE 5	SPL5	Aging Photoperiodism, light perception and signalling Hormones	LOC115700826	XP_030484347.1	XM_030628487.1	8	NC_044379.1	50718084	50719425	+	squamosa promoter-binding protein 1 isoform X1	CsSPL1	CsSPL1	Spitzer-Ramon et al., 2022
None	NA	NA	Aging Photoperiodism, light perception and signalling Hormones	LOC115708833	XP_030492712.1	XM_030636852.1	3	NC_044372.1	6744571	6746362	+	LOW QUALITY PROTEIN: squamosa promoter-binding-like protein 13A	CsSPL13A	CsSPL13A	Spitzer-Ramon et al., 2022
None	NA	NA	Aging Photoperiodism, light perception and signalling Hormones	LOC115708847	XP_030492727.1	XM_030636866.1	3	NC_044372.1	6555443	6557235	-	squamosa promoter-binding-like protein 13A isoform X1	CsSPL13A'	CsSPL13A'	Spitzer-Ramon et al., 2022
None	NA	NA	Aging Photoperiodism, light perception and signalling Hormones	LOC115711586	XP_030495813.1	XM_030639953.1	X	NC_044370.1	48981101	48985182	-	squamosa promoter-binding-like protein 14 isoform X1	CsSPL14	CsSPL14	Spitzer-Ramon et al., 2022
None	NA	NA	Aging Photoperiodism, light perception and signalling Hormones	LOC115715227	XP_030499927.1	XM_030644067.1	4	NC_044373.1	20429423	20430819	+	squamosa promoter-binding-like protein 16	CsSPL16	CsSPL16	Spitzer-Ramon et al., 2022
None	NA	NA	Aging Photoperiodism, light perception and signalling Hormones	LOC115700645	XP_030484117.1	XM_030628257.1	8	NC_044379.1	57408006	57409783	+	squamosa promoter-binding-like protein 18 isoform X1	CsSPL18	CsSPL18	Spitzer-Ramon et al., 2022
None	NA	NA	Aging Photoperiodism, light perception and signalling Hormones	LOC115714374	XP_030498912.1	XM_030643052.1	4	NC_044373.1	15373317	15375254	+	squamosa promoter-binding-like protein 2	CsSPL2	CsSPL2	Spitzer-Ramon et al., 2022
AT2G33810.1	SQUAMOSA PROMOTER BINDING PROTEIN-LIKE 3	SPL3	Aging Photoperiodism, light perception and signalling Hormones	LOC115697710	XP_030480668.1	XM_030624808.1	7	NC_044378.1	27058027	27059561	+	squamosa promoter-binding-like protein 3	CsSPL3	CsSPL3	Spitzer-Ramon et al., 2022
None	NA	NA	Aging Photoperiodism, light perception and signalling Hormones	LOC115711493	XP_030495693.1	XM_030639833.1	3	NC_044372.1	57792264	57794562	-	squamosa promoter-binding-like protein 6 isoform X1	CsSPL6	CsSPL6	Spitzer-Ramon et al., 2022
None	NA	NA	Aging Photoperiodism, light perception and signalling Hormones	LOC115722150	XP_030507139.1	XM_030651279.1	9	NC_044376.1	9925883	9931966	-	squamosa promoter-binding-like protein 7	CsSPL7	CsSPL7	Spitzer-Ramon et al., 2022
None	NA	NA	Aging Photoperiodism, light perception and signalling Hormones	LOC115717402	XP_030502228.1	XM_030646368.1	5	NC_044374.1	44140951	44142851	-	LOW QUALITY PROTEIN: squamosa promoter-binding-like protein 8	CsSPL8'	CsSPL8	Spitzer-Ramon et al., 2022
None	NA	NA	Aging Photoperiodism, light perception and signalling Hormones	LOC115717437	XP_030502283.1	XM_030646423.1	5	NC_044374.1	39345053	39346953	+	squamosa promoter-binding-like protein 8	CsSPL8'	CsSPL8'	Spitzer-Ramon et al., 2022
AT3G57920.1	SQUAMOSA PROMOTER BINDING PROTEIN-LIKE 15	SPL15	Aging	LOC115701122	XP_030484680.1	XM_030628820.1	8	NC_044379.1	26625167	26628254	+	squamosa promoter-binding-like protein 9	CsSPL9	CsSPL9	Spitzer-Ramon et al., 2022
AT2G42200.1	SQUAMOSA PROMOTER BINDING PROTEIN-LIKE 9	SPL9	Aging	LOC115701122	XP_030484680.1	XM_030628820.1	8	NC_044379.1	26625167	26628254	+	squamosa promoter-binding-like protein 9	CsSPL9	CsSPL9	Spitzer-Ramon et al., 2022
AT4G35900.1	FD	FD	Photoperiodism, light perception and signalling	LOC115715251	XP_030499953.1	XM_030644093.1	4	NC_044373.1	79302204	79303389	+	protein FD	FD	CsFD1	Spitzer-Ramon et al., 2022
AT2G17770.2	FD PARALOG, BASIC REGION/LEUCINE ZIPPER MOTIF 27	FDP, BZIP27	Photoperiodism, light perception and signalling	LOC115715251	XP_030499953.1	XM_030644093.1	4	NC_044373.1	79302204	79303389	+	protein FD	FD	CsFD1	This study/Spitzer-Ramon et al., (2022)
None	NA	NA	Photoperiodism, light perception and signalling	LOC115714490	XP_030499075.1	XM_030643215.1	X	NC_044370.1	75289063	75291690	-	bZIP transcription factor 46	FD paralog	CsFD2	This study
AT1G77080.2	FLOWERING LOCUS M, MADS AFFECTING FLOWERING 1, AGAMOUS-LIKE 27	FLM, MAF1, AGL27	Ambient temperature Vernalization	LOC115725163	XP_030510457.1	XM_030654597.1	6	NC_044377.1	71531269	71557851	-	truncated transcription factor CAULIFLOWER A	FLC	FLC-like	Chen et al., 2022
AT5G65060.1	MADS AFFECTING FLOWERING 3 , AGAMOUS-LIKE 70	MAF3, AGL70	Vernalization	LOC115725163	XP_030510457.1	XM_030654597.1	6	NC_044377.1	71531269	71557851	-	truncated transcription factor CAULIFLOWER A	FLC
AT5G65070.1	MADS AFFECTING FLOWERING 4 , AGAMOUS-LIKE 69	MAF4, AGL69	Vernalization	LOC115725163	XP_030510457.1	XM_030654597.1	6	NC_044377.1	71531269	71557851	-	truncated transcription factor CAULIFLOWER A	FLC
None	NA	NA	General	LOC115704295	XP_030487368.1	XM_030631508.1	1	NC_044371.1	42054000	42056889	-	MADS-box transcription factor 27 isoform X1	FLC
None	NA	NA	Photoperiodism, light perception and signalling	LOC115708930	XP_030492818.1	XM_030636958.1	3	NC_044372.1	6796739	6800419	-	agamous-like MADS-box protein AGL16	FLC
None	NA	NA	Photoperiodism, light perception and signalling	LOC115709034	XP_030492926.1	XM_030637066.1	3	NC_044372.1	6492840	6496516	+	agamous-like MADS-box protein AGL16	FLC
AT1G65360.1	AGAMOUS LIKE 23	AGL23	Photoperiodism, light perception and signalling	LOC115715566	XP_030500068.1	XM_030644208.1	X	NC_044370.1	8153115	8154479	-	agamous-like MADS-box protein AGL90	Ma
AT3G66656.1	AGAMOUS-LIKE 91	AGL91	Photoperiodism, light perception and signalling	LOC115696778	XP_030479522.1	XM_030623662.1	7	NC_044378.1	67896805	67897290	+	agamous-like MADS-box protein AGL29	Ma
None	NA	NA	Photoperiodism, light perception and signalling	LOC115699894	XP_030483297.1	XM_030627437.1	8	NC_044379.1	16882884	16883603	-	agamous-like MADS-box protein AGL29	Ma
None	NA	NA	Photoperiodism, light perception and signalling	LOC115701193	XP_030484775.1	XM_030628915.1	8	NC_044379.1	4702196	4702942	-	agamous-like MADS-box protein AGL29	Ma
None	NA	NA	Photoperiodism, light perception and signalling	LOC115704551	XP_030487612.1	XM_030631752.1	1	NC_044371.1	90604753	90605352	+	agamous-like MADS-box protein AGL62	Ma
None	NA	NA	Photoperiodism, light perception and signalling	LOC115704552	XP_030487613.1	XM_030631753.1	1	NC_044371.1	90607299	90607871	+	agamous-like MADS-box protein AGL62	Ma
None	NA	NA	Photoperiodism, light perception and signalling	LOC115713874	XP_030498217.1	XM_030642357.1	X	NC_044370.1	70624274	70624906	+	agamous-like MADS-box protein AGL62	Ma
None	NA	NA	Photoperiodism, light perception and signalling	LOC115715550	XP_030500067.1	XM_030644207.1	X	NC_044370.1	8131872	8133380	-	agamous-like MADS-box protein AGL65	Ma
None	NA	NA	General	LOC115720098	XP_030505120.1	XM_030649260.1	2	NC_044375.1	41182315	41182788	+	MADS-box transcription factor 23-like	Ma
None	NA	NA	General	LOC115720099	XP_030505122.1	XM_030649262.1	2	NC_044375.1	41193441	41193914	-	MADS-box transcription factor 23-like	Ma
None	NA	NA	MADS	LOC115695547	XP_030478465.1	XM_030622605.1	6	NC_044377.1	77202184	77202846	-	MADS-box transcription factor 23-like	Mb
None	NA	NA	Flower development and meristem identity	LOC115695548	XP_030478466.1	XM_030622606.1	6	NC_044377.1	77212431	77213312	-	floral homeotic protein DEFICIENS-like	Mb
None	NA	NA	Flower development and meristem identity Photoperiodism, light perception and signalling	LOC115700192	XP_030483617.1	XM_030627757.1	X	NC_044370.1	101078076	101079107	-	floral homeotic protein AGAMOUS	Mb
None	NA	NA	Flower development and meristem identity Gibberellins	LOC115700319	XP_030483748.1	XM_030627888.1	8	NC_044379.1	57553118	57554257	-	MADS-box transcription factor 3-like	Mb
None	NA	NA	Photoperiodism, light perception and signalling	LOC115702704	XP_030485988.1	XM_030630128.1	X	NC_044370.1	392149	393102	+	agamous-like MADS-box protein AGL11	Mb
None	NA	NA	Photoperiodism, light perception and signalling	LOC115702756	XP_030486051.1	XM_030630191.1	X	NC_044370.1	363993	364946	+	agamous-like MADS-box protein AGL11	Mb
None	NA	NA	General	LOC115711495	XP_030495699.1	XM_030639839.1	3	NC_044372.1	5809305	5810169	-	uncharacterized protein LOC115711495 isoform X1	Mb
None	NA	NA	Photoperiodism, light perception and signalling	LOC115723632	XP_030508977.1	XM_030653117.1	9	NC_044376.1	18123157	18123921	+	agamous-like MADS-box protein AGL11	Mb
None	NA	NA	Photoperiodism, light perception and signalling	LOC115723650	XP_030508993.1	XM_030653133.1	9	NC_044376.1	20058719	20059396	+	agamous-like MADS-box protein AGL92	Mb
AT5G48670.1	AGAMOUS LIKE 80	AGL80	Photoperiodism, light perception and signalling	LOC115711131	XP_030495327.1	XM_030639467.1	3	NC_044372.1	90822142	90822774	+	agamous-like MADS-box protein AGL80	Mg
None	NA	NA	Photoperiodism, light perception and signalling	LOC115696265	XP_030479035.1	XM_030623175.1	7	NC_044378.1	4505669	4506352	-	agamous-like MADS-box protein AGL80	Mg
None	NA	NA	Photoperiodism, light perception and signalling	LOC115699874	XP_030483277.1	XM_030627417.1	8	NC_044379.1	14400601	14401668	+	agamous-like MADS-box protein AGL82	Mg
None	NA	NA	Photoperiodism, light perception and signalling	LOC115702176	XP_030485511.1	XM_030629651.1	X	NC_044370.1	22873895	22874611	+	agamous-like MADS-box protein AGL80	Mg
None	NA	NA	Photoperiodism, light perception and signalling	LOC115711133	XP_030495329.1	XM_030639469.1	3	NC_044372.1	90827867	90828592	+	agamous-like MADS-box protein AGL80	Mg
None	NA	NA	Photoperiodism, light perception and signalling	LOC115711139	XP_030495333.1	XM_030639473.1	3	NC_044372.1	91028359	91028991	+	agamous-like MADS-box protein AGL80	Mg
None	NA	NA	Photoperiodism, light perception and signalling	LOC115711141	XP_030495336.1	XM_030639476.1	3	NC_044372.1	91034000	91034725	+	agamous-like MADS-box protein AGL80	Mg
None	NA	NA	Photoperiodism, light perception and signalling	LOC115718453	XP_030503101.1	XM_030647241.1	X	NC_044370.1	22869150	22869785	+	agamous-like MADS-box protein AGL80	Mg
None	NA	NA	Photoperiodism, light perception and signalling	LOC115718482	XP_030503137.1	XM_030647277.1	X	NC_044370.1	22880755	22885529	+	agamous-like MADS-box protein AGL80	Mg
None	NA	NA	Photoperiodism, light perception and signalling	LOC115718553	XP_030503216.1	XM_030647356.1	X	NC_044370.1	22920958	22921581	+	agamous-like MADS-box protein AGL80	Mg
None	NA	NA	Photoperiodism, light perception and signalling	LOC115721035	XP_030506124.1	XM_030650264.1	2	NC_044375.1	89429504	89430262	-	agamous-like MADS-box protein AGL80	Mg
AT2G03060.2	AGAMOUS LIKE 30	AGL30	Photoperiodism, light perception and signalling	LOC115701208	XP_030484795.1	XM_030628935.1	8	NC_044379.1	19402790	19406153	-	agamous-like MADS-box protein AGL30 isoform X1	MIKCS
AT1G77950.2	AGAMOUS LIKE 67	AGL67	Photoperiodism, light perception and signalling	LOC115713471	XP_030497815.1	XM_030641955.1	4	NC_044373.1	46618521	46621171	-	agamous-like MADS-box protein AGL104	MIKCS
None	NA	NA	Photoperiodism, light perception and signalling	LOC115709360	XP_030493305.1	XM_030637445.1	3	NC_044372.1	18796139	18799688	-	agamous-like MADS-box protein AGL65 isoform X1	MIKCS
None	NA	NA	Photoperiodism, light perception and signalling	LOC115711048	XP_030495246.1	XM_030639386.1	X	NC_044370.1	43274811	43300812	+	agamous-like MADS-box protein AGL66 isoform X1	MIKCS
AT4G25000.1	ALPHA-AMYLASE-LIKE	AMY1	General	LOC115721187	XP_030506303.1	XM_030650443.1	2	NC_044375.1	1995017	1997486	-	alpha-amylase	NA
AT4G34710.1	ARGININE DECARBOXYLASE 2	ADC2	Gibberellins	LOC115725364	XP_030510714.1	XM_030654854.1	6	NC_044377.1	72948286	72950439	+	arginine decarboxylase	NA
AT3G60870.1	AT-HOOK MOTIF NUCLEAR-LOCALIZED PROTEIN 18	AHL18	General	LOC115704801	XP_030487868.1	XM_030632008.1	1	NC_044371.1	85618419	85619384	-	AT-hook motif nuclear-localized protein 22	NA
AT1G20900.1	AT-HOOK MOTIF NUCLEAR-LOCALIZED PROTEIN 27, ESCAROLA	AHL27, ESC	General	LOC115711709	XP_030495959.1	XM_030640099.1	X	NC_044370.1	49275848	49276795	+	AT-hook motif nuclear-localized protein 27	NA
AT1G76500.1	AT-HOOK MOTIF NUCLEAR-LOCALIZED PROTEIN 29, SUPPRESSOR OF PHYB-4#3	AHL29, SOB3	General	LOC115711709	XP_030495959.1	XM_030640099.1	X	NC_044370.1	49275848	49276795	+	AT-hook motif nuclear-localized protein 27	NA
AT5G62000.1	AUXIN RESPONSE FACTOR 2	ARF2	Hormones	LOC115705675	XP_030488932.1	XM_030633072.1	1	NC_044371.1	74396596	74401020	-	auxin response factor 2B	NA
AT1G06770.1	BMI1B, DREB2A-INTERACTING PROTEIN 1	AtBMI1B, DRIP1	General	LOC115697422	XP_030480277.1	XM_030624417.1	7	NC_044378.1	22120686	22124342	+	E3 ubiquitin protein ligase DRIP2	NA
AT5G59570.1	BROTHER OF LUX ARRHYTHMO	BOA	Circadian Clock	LOC115718944	XP_030503633.1	XM_030647773.1	2	NC_044375.1	74055264	74056259	-	transcription factor BOA	NA
AT5G37770.1	CALMODULIN-LIKE 24 , TOUCH 2	CML24, TCH2	General	LOC115709487	XP_030493464.1	XM_030637604.1	3	NC_044372.1	66081669	66082163	+	probable calcium-binding protein CML23	NA
AT4G25490.1	C-REPEAT/DRE BINDING FACTOR 1 , DRE BINDING PROTEIN 1B	CBF1, DREB1B	Response to cold	LOC115717362	XP_030502190.1	XM_030646330.1	5	NC_044374.1	15901449	15902135	-	dehydration-responsive element-binding protein 1D	NA
AT2G39360.1	CURVY1	CVY1	General	LOC115706267	XP_030489715.1	XM_030633855.1	1	NC_044371.1	23601540	23603980	+	LOW QUALITY PROTEIN: probable receptor-like protein kinase At5g59700	NA
AT5G60800.1	EAVY METAL-ASSOCIATED ISOPRENYLATED PLANT PROTEIN3	HIPP3	General	LOC115720800	XP_030505837.1	XM_030649977.1	2	NC_044375.1	45888073	45889825	-	heavy metal-associated isoprenylated plant protein 3	NA
AT3G63060.1	EID1-LIKE 3	EDL3	Hormones	LOC115703242	XP_030486623.1	XM_030630763.1	X	NC_044370.1	13988411	13989391	-	EID1-like F-box protein 3	NA
AT5G50080.1	ETHYLENE RESPONSE FACTOR 110	ERF110	Hormones	LOC115708229	XP_030492311.1	XM_030636451.1	X	NC_044370.1	26694879	26696287	+	ethylene-responsive transcription factor ERF110	NA
AT1G52520.1	FAR1-RELATED SEQUENCE 6	FRS6	Photoperiodism, light perception and signaling	LOC115704634	XP_030487696.1	XM_030631836.1	1	NC_044371.1	99721089	99727789	-	uncharacterized protein LOC115704634	NA
AT1G80010.1	FAR1-RELATED SEQUENCE 8	FRS8	Photoperiodism, light perception and signaling	LOC115707873	XP_030491822.1	XM_030635962.1	1	NC_044371.1	99730373	99733215	-	protein FAR1-RELATED SEQUENCE 8	NA
AT2G35670.1	FERTILIZATION INDEPENDENT SEED 2, FERTILIZATION-INDEPENDENT ENDOSPERM 2	FIS2, FIE2	General	LOC115717209	XP_030502030.1	XM_030646170.1	5	NC_044374.1	79158187	79171648	-	polycomb group protein EMBRYONIC FLOWER 2	NA
AT3G12145.1	FLOR1, FLORAL TRANSITION AT THE MERISTEM 4	FLR1, FTM4	Photoperiodism, light perception and signaling	LOC115699587	XP_030482934.1	XM_030627074.1	8	NC_044379.1	27079529	27080530	-	polygalacturonase inhibitor	NA
AT5G05980.1	FOLYLPOLYGLUTAMATE SYNTHETASE 1 , DHFS-FPGS HOMOLOG B	FPGS1, DFB	General	LOC115706452	XP_030489966.1	XM_030634106.1	1	NC_044371.1	10167545	10172168	+	folylpolyglutamate synthase	NA
AT3G55630.1	FOLYLPOLYGLUTAMATE SYNTHETASE 3, DHFS-FPGS HOMOLOG D	FPGS3, DFD	General	LOC115706452	XP_030489966.1	XM_030634106.1	1	NC_044371.1	10167545	10172168	+	folylpolyglutamate synthase	NA
AT5G15230.1	GAST1 PROTEIN HOMOLOG 4	GASA4	Hormones	LOC115701397	XP_030485044.1	XM_030629184.1	8	NC_044379.1	62292001	62292762	+	gibberellin-regulated protein 4	NA
AT1G48270.1	G-PROTEIN-COUPLED RECEPTOR 1	GCR1	General	LOC115706017	XP_030489377.1	XM_030633517.1	X	NC_044370.1	21064987	21068229	-	G-protein coupled receptor 1	NA
AT3G05040.1	HASTY 1	HST1	General	LOC115719635	XP_030504610.1	XM_030648750.1	2	NC_044375.1	9023238	9031574	-	protein HASTY 1	NA
AT4G38130.1	HISTONE DEACETYLASE 1 , HISTONE DEACETYLASE 19, AtRPD3A	HDA1, HDA19,	Flower development and meristem identity	LOC115702813	XP_030486110.1	XM_030630250.1	X	NC_044370.1	2061515	2064724	+	histone deacetylase 19 isoform X1	NA
AT2G18000.1	HOMOLOG OF YEAST YAF9 B, TBP-ASSOCIATED FACTOR 14	YAF9B, TAF14	General	LOC115715214	XP_030499918.1	XM_030644058.1	4	NC_044373.1	85886391	85889190	-	transcription initiation factor TFIID subunit 14b	NA
AT5G13320.1	HOPW1-1-INTERACTING 3, GH3-LIKE DEFENSE GENE 1, GRETCHEN HAGEN 3.12	WIN3, GDG1, GH3.12	General	LOC115712176	XP_030496286.1	XM_030640426.1	4	NC_044373.1	32711262	32713328	+	indole-3-acetic acid-amido synthetase GH3.17	NA
AT5G08230.1	HUA2 LIKE 1	HULK1	General	LOC115707995	XP_030491996.1	XM_030636136.1	1	NC_044371.1	100590986	100598921	-	LOW QUALITY PROTEIN: ENHANCER OF AG-4 protein 2	NA
AT1G09700.1	HYPONASTIC LEAVES 1	HYL1	General	LOC115716447	XP_030501104.1	XM_030645244.1	5	NC_044374.1	2997221	2999536	-	double-stranded RNA-binding protein 1	NA
AT3G23050.1	INDOLE-3-ACETIC ACID 7, AUXIN RESISTANT 2	IAA7, AXR2	Hormones	LOC115718979	XP_030503674.1	XM_030647814.1	2	NC_044375.1	29430990	29432873	-	auxin-responsive protein IAA16	NA
AT5G01040.1	LACCASE 8	LAC8	General	LOC115696962	XP_030479719.1	XM_030623859.1	7	NC_044378.1	10806749	10811407	-	laccase-7	NA
AT3G13682.1	LSD1-LIKE 2	LDL2	General	LOC115694686	XP_030477630.1	XM_030621770.1	6	NC_044377.1	37012462	37014807	-	lysine-specific histone demethylase 1 homolog 2	NA
AT1G02580.1	MEDEA , FERTILIZATION INDEPENDENT SEED 1	MEA, FIS1	General	LOC115707433	XP_030491292.1	XM_030635432.1	X	NC_044370.1	9238080	9243265	-	histone-lysine N-methyltransferase EZA1 isoform X1	NA
AT1G22310.1	METHYL-CPG-BINDING DOMAIN 8	MBD8	General	LOC115709758	XP_030493830.1	XM_030637970.1	X	NC_044370.1	30838152	30842880	-	uncharacterized protein LOC115709758 isoform X2	NA
AT5G48120.1	MMS19 , HOMOLOG OF YEAST MET18	MMS19, MET18	General	LOC115707533	XP_030491397.1	XM_030635537.1	1	NC_044371.1	94148089	94155849	-	MMS19 nucleotide excision repair protein homolog	NA
AT5G06100.1	MYB DOMAIN PROTEIN 33	MYB33	Hormones	LOC115699028	XP_030482097.1	XM_030626237.1	8	NC_044379.1	52383885	52386508	+	transcription factor MYB101	NA
AT3G11440.1	MYB DOMAIN PROTEIN 65	MYB65	Hormones	LOC115699028	XP_030482097.1	XM_030626237.1	8	NC_044379.1	52383885	52386508	+	transcription factor MYB101	NA
AT3G10480.1	NAC DOMAIN CONTAINING PROTEIN 50	NAC050	General	LOC115706009	XP_030489363.1	XM_030633503.1	1	NC_044371.1	81774751	81784440	+	NAC domain containing protein 50	NA
AT3G10490.1	NAC DOMAIN CONTAINING PROTEIN 52	NAC052	General	LOC115706009	XP_030489363.1	XM_030633503.1	1	NC_044371.1	81774751	81784440	+	NAC domain containing protein 50	NA
AT3G48590.1	NUCLEAR FACTOR Y, SUBUNIT C1, HEME ACTIVATOR PROTEIN (YEAST) HOMOLOG 5A	NF-YC1, HAP5A	Photoperiodism, light perception and signaling	LOC115710181	XP_030494384.1	XM_030638524.1	3	NC_044372.1	7585126	7587405	+	nuclear transcription factor Y subunit C-4	NA
AT1G79280.1	NUCLEAR PORE ANCHOR	NUA	General	LOC115705463	XP_030488658.1	XM_030632798.1	1	NC_044371.1	30997620	31019480	-	nuclear-pore anchor isoform X1	NA
AT1G09530.1	PHYTOCHROME INTERACTING FACTOR 3	PIF3	Circadian Clock	LOC115719625	XP_030504594.1	XM_030648734.1	2	NC_044375.1	89552959	89555768	+	transcription factor PIF3	NA
AT2G46970.1	PHYTOCHROME INTERACTING FACTOR 3-LIKE 1	PIL1	Photoperiodism, light perception and signaling	LOC115719625	XP_030504594.1	XM_030648734.1	2	NC_044375.1	89552959	89555768	+	transcription factor PIF3	NA
AT1G50370.1	PHYTOCHROME-ASSOCIATED PROTEIN PHOSPHATASE 1	FYPP1	Photoperiodism, light perception and signaling	LOC115725593	XP_030511032.1	XM_030655172.1	6	NC_044377.1	29431016	29435912	+	serine/threonine-protein phosphatase PP-X isozyme 2	NA
AT3G19980.1	PHYTOCHROME-ASSOCIATED PROTEIN PHOSPHATASE 3	FYPP3	Photoperiodism, light perception and signaling	LOC115725593	XP_030511032.1	XM_030655172.1	6	NC_044377.1	29431016	29435912	+	serine/threonine-protein phosphatase PP-X isozyme 2	NA
AT2G25170.1	PICKLE , SUPPRESSOR OF SLR 2, CYTOKININ-HYPERSENSITIVE 2	PKL, SSL2, CKH2	Flower development and meristem identity	LOC115697355	XP_030480183.1	XM_030624323.1	7	NC_044378.1	16201133	16212472	+	protein CHROMATIN REMODELING 4 isoform X1	NA
AT1G51690.1	PROTEIN PHOSPHATASE 2A 55 KDA REGULATORY SUBUNIT B ALPHA ISOFORM	PP2A-B55ALPHA	General	LOC115707237	XP_030490990.1	XM_030635130.1	X	NC_044370.1	22808911	22813155	-	serine/threonine protein phosphatase 2A 55 kDa regulatory subunit B beta isoform isoform X1	NA
AT1G17720.1	PROTEIN PHOSPHATASE 2A 55 KDA REGULATORY SUBUNIT B BETA ISOFORM	PP2A-B55BETA	General	LOC115707237	XP_030490990.1	XM_030635130.1	X	NC_044370.1	22808911	22813155	-	serine/threonine protein phosphatase 2A 55 kDa regulatory subunit B beta isoform isoform X1	NA
AT1G18080.1	RECEPTOR FOR ACTIVATED C KINASE 1 A , ARABIDOPSIS THALIANA HOMOLOG OF THE TOBACCO ARCA	RACK1A, ATARCA	General	LOC115709323	XP_030493262.1	XM_030637402.1	3	NC_044372.1	91938177	91939725	+	guanine nucleotide-binding protein subunit beta-like protein	NA
AT5G52250.1	REPRESSOR OF UV-B PHOTOMORPHOGENESIS 1, EARLY FLOWERING BY OVEREXPRESSION 1	RUP1, EFO1	Photoperiodism, light perception and signaling	LOC115706381	XP_030489874.1	XM_030634014.1	1	NC_044371.1	85827403	85831935	+	protein SPA1-RELATED 3 isoform X1	NA
AT4G16110.1	RESPONSE REGULATOR 2 , ARABIDOPSIS RESPONSE REGULATOR 2	RR2, ARR2	Hormones	LOC115721904	XP_030506868.1	XM_030651008.1	9	NC_044376.1	5944103	5947248	+	two-component response regulator ARR2	NA
AT2G33380.1	RESPONSIVE TO DESSICATION20 , PEROXYGENASE3, ARABIDOPSIS THALIANA CALEOSIN 3	RD20, PXG3, ATCLO3	Hormones	LOC115722671	XP_030507798.1	XM_030651938.1	9	NC_044376.1	3671867	3673053	-	peroxygenase-like	NA
AT3G09600.1	REVEILLE8	RVE8	Circadian Clock	LOC115709988	XP_030494131.1	XM_030638271.1	3	NC_044372.1	69226410	69229732	+	protein REVEILLE 8 isoform X1	NA
AT4G11110.1	SPA1-RELATED 2	SPA2	Photoperiodism, light perception and signaling	LOC115721945	XP_030506912.1	XM_030651052.1	9	NC_044376.1	60212330	60217652	+	protein SPA1-RELATED 2	NA
AT3G51060.1	STYLISH1, SHI RELATED SEQUENCE 1	STY1, SRS1	General	LOC115701393	XP_030485042.1	XM_030629182.1	X	NC_044370.1	103210944	103212549	-	protein EXPRESSION OF TERPENOIDS 1	NA
AT3G01890.1	SWP73A	SWP73A	General	LOC115699449	XP_030482726.1	XM_030626866.1	8	NC_044379.1	57581757	57583764	-	SWI/SNF complex component SNF12 homolog	NA
AT5G10030.1	TGACG MOTIF-BINDING FACTOR 4	TGA4	Photoperiodism, light perception and signaling	LOC115714126	XP_030498543.1	XM_030642683.1	4	NC_044373.1	66699237	66702286	-	transcription factor TGA1	NA
None	miR156	miR156	Aging Photoperiodism, light perception and signalling Hormones	LOC115700826	csa-miR156	NA	8	NC_044379.1	50719190	50719781	+	squamosa promoter-binding protein 1 isoform X1	No NC RNA annotated
None	miR159	miR159	Aging	No NC RNA annotated	csa-miR159a/b	NA	3	NC_044372.1	91899471	91900155	-	NA	No NC RNA annotated
AT1G18100.1	MOTHER OF FT AND TFL1	E12A11	Flowering time integrator	LOC115711426	XP_030495622.1	XM_030639762.1	3	NC_044372.1	92269219	92271234	-	protein MOTHER of FT and TFL1-like	PEBP	CsMFT1	This study
AT2G27550.1	ARABIDOPSIS THALIANA CENTRORADIALIS	ATC	Photoperiodism, light perception and signalling	LOC115720824	XP_030505861.1	XM_030650001.1	2	NC_044375.1	751491	753925	-	CEN-like protein 2	PEBP	CsATC/CsCEN4	This study/Dowling et al., 2023
AT5G62040.1	BROTHER OF FT	BFT	General	LOC115708910	XP_030492795.1	XM_030636935.1	3	NC_044372.1	74197265	74198176	-	protein TERMINAL FLOWER 1	PEBP	CsTFL1	This study/Dowling et al., 2023
None	NA	NA	Flowering time integrator	LOC115697736	XP_030480713.1	XM_030624853.1	X	NC_044370.1	91139074	91143911	+	protein HEADING DATE 3A	PEBP	CsFT3/FT-like	This study/Chen et al., 2022/Dowling et al., 2023
None	NA	NA	Photoperiodism, light perception and signalling	LOC115697843	XP_030480848.1	XM_030624988.1	X	NC_044370.1	91782020	91782832	+	CEN-like protein 1	PEBP	CsBFT3/CET1/CsCEN-LIKE’/CsCEN1	This study/Chen et al., 2022/Spitzer-Ramon et al., (2022)/Dowling et al., 2023
None	NA	NA	Flowering time integrator	LOC115700781	XP_030484282.1	XM_030628422.1	8	NC_044379.1	64421432	64423626	-	protein HEADING DATE 3A-like	PEBP	CsFT1/CsHD3A-LIKE	This study/Spitzer-Ramon et al., (2022)/Dowling et al., 2023
None	NA	NA	Flowering time integrator	LOC115707673	XP_030491560.1	XM_030635700.1	1	NC_044371.1	95669335	95670168	-	protein MOTHER of FT and TFL1	PEBP	CsMFT3/CsMFT	This study/Spitzer-Ramon et al., (2022)
None	NA	NA	Flowering time integrator	LOC115711470	XP_030495670.1	XM_030639810.1	3	NC_044372.1	92134894	92136895	-	protein MOTHER of FT and TFL1-like	PEBP	CsMFT2	This study
None	NA	NA	Photoperiodism, light perception and signalling	LOC115715658	XP_030500175.1	XM_030644315.1	5	NC_044374.1	24998841	24999821	+	CEN-like protein 1	PEBP	CsBFT1/CsCEN-LIKE (BFT)/CsCEN2	This study/Spitzer-Ramon et al., (2022)/Dowling et al., 2023
None	NA	NA	Photoperiodism, light perception and signalling	LOC115715930	XP_030500472.1	XM_030644612.1	5	NC_044374.1	25153725	25154605	+	CEN-like protein 1	PEBP	CsBFT2/CsCEN-LIKE/CsCEN3	This study/Spitzer-Ramon et al., (2022)/Dowling et al., 2023
None	NA	NA	Flower development and meristem identity Gibberellins	LOC115699531	XP_030482855.1	XM_030626995.1	8	NC_044379.1	60341973	60344575	+	floral homeotic protein PMADS 2 isoform X1	PI GLO
None	NA	NA	Flower development and meristem identity Gibberellins	LOC115700653	XP_030484132.1	XM_030628272.1	8	NC_044379.1	60229604	60232196	+	floral homeotic protein PMADS 2-like	PI GLO
AT1G24260.1	AGAMOUS LIKE 9	AGL9	Photoperiodism, light perception and signalling	LOC115712087	XP_030496177.1	XM_030640317.1	4	NC_044373.1	20514465	20525134	+	agamous-like MADS-box protein MADS4	SEP
AT3G02310.1	AGAMOUS-LIKE 4	AGL4	Photoperiodism, light perception and signalling	LOC115700828	XP_030484352.1	XM_030628492.1	8	NC_044379.1	55719791	55723364	-	agamous-like MADS-box protein MADS2 isoform X1	SEP
AT5G10140.1	FLOWERING LOCUS C, AGAMOUS-LIKE 25, FLOWERING LOCUS F	FLC, AGL25, FLF	Flowering time integrator	LOC115700576	XP_030484019.1	XM_030628159.1	8	NC_044379.1	33413628	33421617	+	MADS-box protein CMB1 isoform X1	SEP
AT5G65050.1	MADS AFFECTING FLOWERING 2 , AGAMOUS-LIKE 31	MAF2, AGL31	Ambient temperature	LOC115700827	XP_030484350.1	XM_030628490.1	8	NC_044379.1	55707264	55713874	-	agamous-like MADS-box protein MADS2 isoform X2	SEP
None	NA	NA	Flower development and meristem identity	LOC115701144	XP_030484710.1	XM_030628850.1	8	NC_044379.1	33319648	33379354	+	truncated transcription factor CAULIFLOWER A isoform X1	SEP
None	NA	NA	Photoperiodism, light perception and signalling	LOC115709018	XP_030492901.1	XM_030637041.1	3	NC_044372.1	58129105	58143221	+	agamous-like MADS-box protein MADS2 isoform X1	SEP
AT1G69120.1	APETALA1	AP1	Flower development and meristem identity	LOC115698549	XP_030481491.1	XM_030625631.1	8	NC_044379.1	33545870	33553001	+	truncated transcription factor CAULIFLOWER A isoform X2	SQUA	CsCAL(AP1)	Spitzer-Ramon et al., 2022
AT5G60910.1	FRUITFULL, AGAMOUS-LIKE 8	FUL, AGL8	Flower development and meristem identity Flowering time integrator	LOC115702300	XP_030485608.1	XM_030629748.1	NA	NW_022060528.1	333930	342296	+	truncated transcription factor CAULIFLOWER A	SQUA
AT5G65080.2	MADS AFFECTING FLOWERING 5 , AGAMOUS-LIKE 68	MAF5, AGL68	Vernalization	LOC115702300	XP_030485608.1	XM_030629748.1	NA	NW_022060528.1	333930	342296	+	truncated transcription factor CAULIFLOWER A	SQUA
None	NA	NA	Flower development and meristem identity Vernalisation	LOC115701438	XP_030485101.1	XM_030629241.1	8	NC_044379.1	55669831	55681455	-	truncated transcription factor CAULIFLOWER A	SQUA	CsCAL'(AP1)	Spitzer-Ramon et al., 2022
AT4G24540.1	AGAMOUS-LIKE 24	AGL24	Flower development and meristem identity Flowering time integrator	LOC115714329	XP_030498852.1	XM_030642992.1	4	NC_044373.1	72640291	72644884	+	MADS-box protein JOINTLESS	SVP
AT2G22540.1	SHORT VEGETATIVE PHASE	SVP	Flowering time integrator	LOC115714329	XP_030498852.1	XM_030642992.1	4	NC_044373.1	72640291	72644884	+	MADS-box protein JOINTLESS	SVP
None	NA	NA	General	LOC115720605	XP_030505617.1	XM_030649757.1	2	NC_044375.1	4006213	4024991	-	MADS-box protein AGL24 isoform X1	SVP
None	NA	NA	General	LOC115721274	XP_030506400.1	XM_030650540.1	2	NC_044375.1	4063465	4070319	+	MADS-box protein SVP isoform X1	SVP
AT4G22950.1	AGAMOUS-LIKE 19	AGL19	Vernalization	LOC115706939	XP_030490578.1	XM_030634718.1	1	NC_044371.1	87493759	87505038	+	MADS-box protein SOC1	TM3	SOC1/CsSOC1	Chen et al., 2022/Spitzer-Ramon et al., 2022
AT5G62165.1	AGAMOUS-LIKE 42, FOREVER YOUNG FLOWER	AGL42, FYF	Flower development and meristem identity	LOC115706939	XP_030490578.1	XM_030634718.1	1	NC_044371.1	87493759	87505038	+	MADS-box protein SOC1	TM3	SOC1/CsSOC1	Chen et al., 2022/Spitzer-Ramon et al., 2022
AT5G51870.1	AGAMOUS-LIKE 71	AGL71	Flower development and meristem identity	LOC115706939	XP_030490578.1	XM_030634718.1	1	NC_044371.1	87493759	87505038	+	MADS-box protein SOC1	TM3	SOC1/CsSOC1	Chen et al., 2022/Spitzer-Ramon et al., 2022
AT5G51860.1	AGAMOUS-LIKE 72	AGL72	Flower development and meristem identity	LOC115706939	XP_030490578.1	XM_030634718.1	1	NC_044371.1	87493759	87505038	+	MADS-box protein SOC1	TM3	SOC1/CsSOC1	Chen et al., 2022/Spitzer-Ramon et al., 2022
AT2G45660.1	SUPPRESSOR OF OVEREXPRESSION OF CO 1 , AGAMOUS-LIKE 20	SOC1, AGL20	Flowering time integrator	LOC115706939	XP_030490578.1	XM_030634718.1	1	NC_044371.1	87493759	87505038	+	MADS-box protein SOC1	TM3	SOC1/CsSOC1	Chen et al., 2022/Spitzer-Ramon et al., 2022
AT4G11880.1	XAANTAL2, AGAMOUS-LIKE 14	XAL2, AGL14	Flower development and meristem identity	LOC115716986	XP_030501772.1	XM_030645912.1	5	NC_044374.1	71182493	71220780	-	agamous-like MADS-box protein AGL19 isoform X2	TM3
None	NA	NA	Flower development and meristem identity Gibberellins	LOC115717309	XP_030502139.1	XM_030646279.1	5	NC_044374.1	62753850	62773154	+	MADS-box protein AGL42	TM3
AT1G73830.2	BR ENHANCED EXPRESSION 3	BEE3	Circadian Clock Photoperiodism, light perception and signalling	LOC115708719	XP_030492578.1	XM_030636718.1	3	NC_044372.1	58837930	58840109	+	transcription factor BEE 3
AT2G28150.1	SOSEKI3	SOK3	Flower development and meristem identity Flowering time integrator	LOC115702942	XP_030486274.1	XM_030630414.1	X	NC_044370.1	3340035	3342479	+	protein UPSTREAM OF FLC
AT5G10450.1	14-3-3LAMBDA	14-3-3lambda	Flowering time integrator	LOC115711270	XP_030495469.1	XM_030639609.1	X	NC_044370.1	44887786	44889574	-	14-3-3-like protein B
AT2G13540.1	ABA HYPERSENSITIVE 1 , CAP-BINDING PROTEIN 80	ABH1, CBP80	General	LOC115720866	XP_030505916.1	XM_030650056.1	2	NC_044375.1	55272982	55297203	+	nuclear cap-binding protein subunit 1 isoform X2
AT1G18450.1	ACTIN-RELATED PROTEIN 4	ARP4	General	LOC115698140	XP_030481178.1	XM_030625318.1	7	NC_044378.1	1846936	1851943	+	actin-related protein 4
AT3G33520.1	ACTIN-RELATED PROTEIN 6 , SUPPRESSOR OF FRIGIDA3 , EARLY IN SHORT DAYS 1	ARP6, SUF3, ESD1	General	LOC115694685	XP_030477629.1	XM_030621769.1	6	NC_044377.1	74050624	74052510	-	actin-related protein 6
AT5G48300.1	ADP GLUCOSE PYROPHOSPHORYLASE 1 , ADP-GLUCOSE PYROPHOSPHORYLASE SMALL SUBUNIT 1	ADG1, APS1	Sugar	LOC115699566	XP_030482903.1	XM_030627043.1	8	NC_044379.1	45115376	45118438	-	glucose-1-phosphate adenylyltransferase small subunit 2, chloroplastic
AT1G79430.1	ALTERED PHLOEM DEVELOPMENT, WOODY, FE	APL, WDY, FE	Photoperiodism, light perception and signalling	LOC115703603	XP_030486692.1	XM_030630832.1	1	NC_044371.1	29163184	29164882	+	myb family transcription factor APL isoform X1
AT3G63270.1	ANTAGONIST OF LHP1-1	ALP1	Vernalization	LOC115704038	XP_030487122.1	XM_030631262.1	X	NC_044370.1	15121670	15123126	-	protein ANTAGONIST OF LIKE HETEROCHROMATIN PROTEIN 1
AT4G36920.1	APETALA2	AP2	Flower development and meristem identity	LOC115712803	XP_030497033.1	XM_030641173.1	4	NC_044373.1	79591880	79594668	-	floral homeotic protein APETALA 2 isoform X1
AT1G51450.1	ARABIDOPSIS ASH2 RELATIVE, TRAUCO	ASH2R, TRO	General	LOC115719711	XP_030504719.1	XM_030648859.1	2	NC_044375.1	61753248	61754962	+	protein TRAUCO
AT3G01090.1	ARABIDOPSIS SNF1 KINASE HOMOLOG 10 , SNF1-RELATED PROTEIN KINASE 1.1	AKIN10, SNRK1.1	Sugar	LOC115699018	XP_030482088.1	XM_030626228.1	8	NC_044379.1	62692152	62695465	-	SNF1-related protein kinase catalytic subunit alpha KIN10
AT1G04870.1	ARABIDOPSIS THALIANA PROTEIN ARGININE METHYLTRANSFERASE 10	ATPRMT10	General	LOC115706212	XP_030489649.1	XM_030633789.1	1	NC_044371.1	84356451	84359302	-	protein arginine N-methyltransferase PRMT10
AT5G42400.1	ARABIDOPSIS TRITHORAX-RELATED 7 , SET DOMAIN PROTEIN 25	ATXR7, SDG25	General	LOC115719082	XP_030503923.1	XM_030648063.1	X	NC_044370.1	78450410	78456904	-	histone-lysine N-methyltransferase ATXR7 isoform X8
AT2G37630.1	ASYMMETRIC LEAVES 1	AS1	Photoperiodism, light perception and signalling	LOC115700529	XP_030483937.1	XM_030628077.1	8	NC_044379.1	54802342	54803526	+	protein rough sheath 2 homolog
AT3G55850	AT3G55850	LAF3	Photoperiodism, light perception and signalling	LOC115705698	XP_030488961.1	XM_030633101.1	1	NC_044371.1	21549560	21562779	-	protein LONG AFTER FAR-RED 3		Autoflower candidate region
AT5G58140.2	AT5G58140.2	AtPHOT2	Photoperiodism, light perception and signalling	LOC115702815	XP_030486112.1	XM_030630252.1	X	NC_044370.1	2077690	2087796	+	phototropin-2
AT2G45430.1	AT-HOOK MOTIF NUCLEAR-LOCALIZED PROTEIN 22	AHL22	General	LOC115704801	XP_030487868.1	XM_030632008.1	1	NC_044371.1	85618419	85619384	-	AT-hook motif nuclear-localized protein 22
AT1G68570.1	ATNPF3.1	AtNPF3.1	Hormones	LOC115712669	XP_030496856.1	XM_030640996.1	4	NC_044373.1	2143050	2146198	+	protein NRT1/ PTR FAMILY 3.1
AT1G54440.1	AtRRP6L1	RRP6L1	General	LOC115722268	XP_030507290.1	XM_030651430.1	9	NC_044376.1	58759884	58764526	-	protein RRP6-like 2
AT5G35910.1	AtRRP6L2	RRP6L2	General	LOC115722268	XP_030507290.1	XM_030651430.1	9	NC_044376.1	58759884	58764526	-	protein RRP6-like 2
AT5G60410.1	ATSIZ1	SIZ1	General	LOC115718561	XP_030503222.1	XM_030647362.1	2	NC_044375.1	92489627	92497786	+	E3 SUMO-protein ligase SIZ1 isoform X1
AT4G12640.1	ATSPEN2	AtSPEN2	General	LOC115699042	XP_030482110.1	XM_030626250.1	8	NC_044379.1	46510089	46512872	-	flowering time control protein FPA
AT1G66650	AT-STUbl4	AT-STUbl4	Photoperiodism, light perception and signalling	LOC115722869	XP_030508075.1	XM_030652215.1	9	NC_044376.1	58928036	58930317	-	putative E3 ubiquitin-protein ligase SINA-like 6
AT3G27010.1	AT-TCP20	AT-TCP20	Circadian Clock	LOC115714915	XP_030499533.1	XM_030643673.1	4	NC_044373.1	19770167	19770961	-	transcription factor TCP20
AT5G14170.1	BAF60, CHC1	BAF60, CHC1	General	LOC115699449	XP_030482726.1	XM_030626866.1	8	NC_044379.1	57581757	57583764	-	SWI/SNF complex component SNF12 homolog
AT4G38960.1	B-BOX DOMAIN PROTEIN 19	BBX19	Photoperiodism, light perception and signalling	LOC115725553	XP_030510973.1	XM_030655113.1	6	NC_044377.1	73084761	73086533	+	B-box zinc finger protein 19
AT2G42300.1	BHLH48	NA	Circadian Clock Photoperiodism, light perception and signalling	LOC115711588	XP_030495812.1	XM_030639952.1	3	NC_044372.1	78839635	78843971	-	transcription factor bHLH48
AT3G23980.1	BLISTER	BLI	Vernalization	LOC115722241	XP_030507256.1	XM_030651396.1	9	NC_044376.1	3124854	3131247	+	protein BLISTER
AT3G23060.1	BMI1C	AtBMI1C	General	LOC115697422	XP_030480277.1	XM_030624417.1	7	NC_044378.1	22120686	22124342	+	E3 ubiquitin protein ligase DRIP2
AT2G46020.1	BRAHMA, CHROMATIN REMODELING 2	BRM, CHR2	General	LOC115706471	XP_030489988.1	XM_030634128.1	1	NC_044371.1	86371044	86381998	-	ATP-dependent helicase BRM
AT4G23100.1	CADMIUM SENSITIVE 2 , ROOT MERISTEMLESS 1 , GLUTAMATE-CYSTEINE LIGASE	CAD2, RML1, GSH1	General	LOC115716234	XP_030500846.1	XM_030644986.1	5	NC_044374.1	47899167	47904109	-	glutamate--cysteine ligase, chloroplastic
AT1G50700.1	CALCIUM DEPENDENT PROTEIN KINASE 33	CPK33	Photoperiodism, light perception and signalling	LOC115724816	XP_030510026.1	XM_030654166.1	6	NC_044377.1	38923845	38927610	+	calcium-dependent protein kinase 2
AT2G17290.1	CALCIUM DEPENDENT PROTEIN KINASE 6	CPK6	Photoperiodism, light perception and signalling	LOC115702856	XP_030486162.1	XM_030630302.1	X	NC_044370.1	2395914	2398217	-	calcium-dependent protein kinase 26 isoform X2
AT5G44200.1	CAP-BINDING PROTEIN 20	CBP20	General	LOC115700793	XP_030484301.1	XM_030628441.1	8	NC_044379.1	50981124	50984870	+	nuclear cap-binding protein subunit 2
AT3G60250.1	CASEIN KINASE II BETA SUBUNIT 3	CKB3	Circadian Clock	LOC115710360	XP_030494591.1	XM_030638731.1	X	NC_044370.1	34511135	34513861	-	putative casein kinase II subunit beta-4 isoform X1
AT2G44680.1	CASEIN KINASE II BETA SUBUNIT 4	CKB4	Circadian Clock	LOC115710360	XP_030494591.1	XM_030638731.1	X	NC_044370.1	34511135	34513861	-	putative casein kinase II subunit beta-4 isoform X1
AT2G46830.1	CIRCADIAN CLOCK ASSOCIATED 1	CCA1	Circadian Clock	LOC115705224	XP_030488352.1	XM_030632492.1	1	NC_044371.1	42149809	42155892	-	LOW QUALITY PROTEIN: protein LHY-like
AT1G71800.1	CLEAVAGE STIMULATING FACTOR 64	CSTF64	General	LOC115712297	XP_030496426.1	XM_030640566.1	X	NC_044370.1	55381114	55385145	-	cleavage stimulating factor 64 isoform X2
AT4G38680.1	COLD SHOCK PROTEIN 2, GLYCINE RICH PROTEIN 2	CSP2, GRP2	General	LOC115702777	XP_030486074.1	XM_030630214.1	X	NC_044370.1	1793606	1794415	-	glycine-rich protein 2-like
AT2G32950.1	CONSTITUTIVE PHOTOMORPHOGENIC 1	COP1	Photoperiodism, light perception and signalling	LOC115699438	XP_030482711.1	XM_030626851.1	8	NC_044379.1	45962491	45968170	+	E3 ubiquitin-protein ligase COP1
AT1G02330.1	COP1 SUPPRESSOR 2,	CSU2	Photoperiodism, light perception and signalling	LOC115715318	XP_030500060.1	XM_030644200.1	X	NC_044370.1	10762668	10764034	+	protein COP1 SUPPRESSOR 2
AT5G63440.2	COP1 SUPPRESSOR 4	CSU4	Circadian Clock	LOC115711550	XP_030495761.1	XM_030639901.1	3	NC_044372.1	7366788	7369131	-	UPF0235 protein At5g63440
AT3G07340.1	CRY2-INTERACTING BHLH 3	CIB3	Circadian Clock Photoperiodism, light perception and signalling	LOC115714681	XP_030499293.1	XM_030643433.1	4	NC_044373.1	88368688	88371056	-	transcription factor bHLH62-like
AT4G08920.1	CRYPTOCHROME 1	CRY1	Photoperiodism, light perception and signalling	LOC115699248	XP_030482423.1	XM_030626563.1	X	NC_044370.1	98401090	98403935	+	cryptochrome-1
AT1G04400.1	CRYPTOCHROME 2	CRY2	Photoperiodism, light perception and signalling	LOC115722889	XP_030508102.1	XM_030652242.1	9	NC_044376.1	328977	333038	+	cryptochrome-1 isoform X1
AT4G34530.1	CRYPTOCHROME-INTERACTING BASIC-HELIX-LOOP-HELIX 1	CIB1	Photoperiodism, light perception and signalling	LOC115714717	XP_030499335.1	XM_030643475.1	4	NC_044373.1	12239071	12241865	+	transcription factor bHLH63 isoform X1
AT5G48560.1	CRYPTOCHROME-INTERACTING BASIC-HELIX-LOOP-HELIX 2	CIB2	Photoperiodism, light perception and signalling	LOC115714543	XP_030499136.1	XM_030643276.1	4	NC_044373.1	88106857	88109243	+	transcription factor bHLH62
AT1G10120.1	CRYPTOCHROME-INTERACTING BASIC-HELIX-LOOP-HELIX 4	CIB4	Photoperiodism, light perception and signalling	LOC115712856	XP_030497119.1	XM_030641259.1	X	NC_044370.1	58248546	58250853	+	transcription factor bHLH74
AT1G26260.1	CRYPTOCHROME-INTERACTING BASIC-HELIX-LOOP-HELIX 5	CIB5	Photoperiodism, light perception and signalling	LOC115699512	XP_030482827.1	XM_030626967.1	8	NC_044379.1	38774437	38776986	+	transcription factor bHLH49
AT1G26830.1	CULLIN 3A	CUL3A	Vernalization	LOC115698686	XP_030481683.1	XM_030625823.1	8	NC_044379.1	20254904	20257946	-	cullin-3A
AT5G46210.1	CULLIN 4	CUL4	General	LOC115697243	XP_030480030.1	XM_030624170.1	7	NC_044378.1	67117363	67124468	-	cullin-4
AT2G23380.1	CURLY LEAF , SETDOMAIN GROUP 1	CLF, SDG1	General Vernalization	LOC115705249	XP_030488389.1	XM_030632529.1	1	NC_044371.1	99253764	99259190	+	histone-lysine N-methyltransferase CLF
AT5G64960.1	CYCLIN-DEPENDENT KINASE C;2	CDKC;2	General	LOC115713009	XP_030497332.1	XM_030641472.1	4	NC_044373.1	77029324	77033367	+	cyclin-dependent kinase C-2
AT5G62430.1	CYCLING DOF FACTOR 1	CDF1	Photoperiodism, light perception and signalling	LOC115709547	XP_030493531.1	XM_030637671.1	3	NC_044372.1	18612159	18614609	+	cyclic dof factor 3
AT5G39660.1	CYCLING DOF FACTOR 2	CDF2	Photoperiodism, light perception and signalling	LOC115709547	XP_030493531.1	XM_030637671.1	3	NC_044372.1	18612159	18614609	+	cyclic dof factor 3
AT3G47500.1	CYCLING DOF FACTOR 3	CDF3	Photoperiodism, light perception and signalling	LOC115709547	XP_030493531.1	XM_030637671.1	3	NC_044372.1	18612159	18614609	+	cyclic dof factor 3
AT2G34140.1	CYCLING DOF FACTOR 4	CDF4	Photoperiodism, light perception and signalling	LOC115697076	XP_030479846.1	XM_030623986.1	7	NC_044378.1	50925072	50925626	+	dof zinc finger protein DOF1.5
AT1G69570.1	CYCLING DOF FACTOR 5	CDF5	Photoperiodism, light perception and signalling	LOC115709547	XP_030493531.1	XM_030637671.1	3	NC_044372.1	18612159	18614609	+	cyclic dof factor 3
AT5G24910.1	CYP714A1	CYP714A1	Gibberellins	LOC115706085	XP_030489461.1	XM_030633601.1	1	NC_044371.1	730323	736978	-	cytochrome P450 714A1
AT4G10180.1	DE-ETIOLATED 1 , FUSCA 2	DET1, FUS2	General Photoperiodism, light perception and signalling	LOC115714721	XP_030499338.1	XM_030643478.1	4	NC_044373.1	29643541	29651594	-	light-mediated development protein DET1 isoform X1
AT1G01040.1	DICER-LIKE 1	DCL1	General	LOC115706055	XP_030489429.1	XM_030633569.1	1	NC_044371.1	41829119	41839178	+	LOW QUALITY PROTEIN: endoribonuclease Dicer homolog 1-like
AT3G43920.1	DICER-LIKE 3	DCL3	General	LOC115706055	XP_030489429.1	XM_030633569.1	1	NC_044371.1	41829119	41839178	+	LOW QUALITY PROTEIN: endoribonuclease Dicer homolog 1-like
AT5G20320.1	DICER-LIKE 4	DCL4	General	LOC115725068	XP_030510343.1	XM_030654483.1	6	NC_044377.1	22306520	22322533	-	dicer-like protein 4 isoform X1
AT3G44110.1	DNAJ HOMOLOG 3	ATJ3	General	LOC115705392	XP_030488586.1	XM_030632726.1	1	NC_044371.1	66247522	66250752	-	dnaJ protein homolog
AT4G22140.1	EARLY BOLTING IN SHORT DAYS	EBS	Photoperiodism, light perception and signalling	LOC115703682	XP_030486781.1	XM_030630921.1	1	NC_044371.1	96814208	96816597	+	chromatin remodeling protein EBS
AT2G25930.1	EARLY FLOWERING 3	ELF3	Circadian Clock Photoperiodism, light perception and signalling	LOC115703149	XP_030486509.1	XM_030630649.1	X	NC_044370.1	5944758	5948802	-	protein EARLY FLOWERING 3
AT2G40080.1	EARLY FLOWERING 4	ELF4	Circadian Clock Photoperiodism, light perception and signalling	LOC115706039	XP_030489400.1	XM_030633540.1	1	NC_044371.1	12938078	12938742	-	protein EARLY FLOWERING 4
AT5G04240.1	EARLY FLOWERING 6	ELF6	General	LOC115708259	XP_030492340.1	XM_030636480.1	1	NC_044371.1	23330209	23337034	-	probable lysine-specific demethylase ELF6
AT1G79730.1	EARLY FLOWERING 7	ELF7	General	LOC115707534	XP_030491398.1	XM_030635538.1	1	NC_044371.1	94143816	94147311	+	protein PAF1 homolog
AT2G06210.1	EARLY FLOWERING 8, VERNALIZATION INDEPENDENCE 6	ELF8, VIP6	General	LOC115707487	XP_030491326.1	XM_030635466.1	1	NC_044371.1	28067566	28076816	-	protein CTR9 homolog
AT1G77300.1	EARLY FLOWERING IN SHORT DAYS , SET DOMAIN GROUP 8	EFS, SDG8	General	LOC115698553	XP_030481515.1	XM_030625655.1	X	NC_044370.1	95196910	95209976	+	histone-lysine N-methyltransferase ASHH2 isoform X2
AT2G03500.1	EARLY FLOWERING MYB FLOWERING	EFM	Ambient temperature	LOC115707482	XP_030491321.1	XM_030635461.1	1	NC_044371.1	84045152	84047457	+	myb family transcription factor EFM
AT4G15880.1	EARLY IN SHORT DAYS 4	ESD4	General	LOC115723461	XP_030508809.1	XM_030652949.1	9	NC_044376.1	7914390	7917099	-	ubiquitin-like-specific protease ESD4
AT2G39810.1	EARLY IN SHORT DAYS 6, HIGH EXPRESSION OF OSMOTICALLY RESPONSIVE GENES 1	ESD6, HOS1	Photoperiodism, light perception and signalling	LOC115716255	XP_030500875.1	XM_030645015.1	5	NC_044374.1	78569141	78575239	+	E3 ubiquitin-protein ligase HOS1
AT1G08260.1	EARLY IN SHORT DAYS 7 , TILTED 1 , ABA OVERLY SENSITIVE 4	ESD7, TIL1, ABO4	General	LOC115719330	XP_030504178.1	XM_030648318.1	2	NC_044375.1	108739	125821	+	DNA polymerase epsilon catalytic subunit A isoform X1
AT5G11530.1	EMBRYONIC FLOWER 1	EMF1	General	LOC115699365	XP_030482631.1	XM_030626771.1	X	NC_044370.1	98606472	98612133	-	protein EMBRYONIC FLOWER 1 isoform X3
AT5G51230.1	EMBRYONIC FLOWER 2, CYTOKININ RESISTANT 1	EMF2, CYR1	General	LOC115706711	XP_030490288.1	XM_030634428.1	1	NC_044371.1	87981399	87993187	+	polycomb group protein EMBRYONIC FLOWER 2 isoform X2
AT5G23150.1	ENHANCER OF AG-4 2	HUA2	General	LOC115707995	XP_030491996.1	XM_030636136.1	1	NC_044371.1	100590986	100598921	-	LOW QUALITY PROTEIN: ENHANCER OF AG-4 protein 2
AT5G02200.1	FAR-RED-ELONGATED HYPOCOTYL1-LIKE	FHL	Photoperiodism, light perception and signalling	LOC115694780	XP_030477732.1	XM_030621872.1	6	NC_044377.1	13685110	13686441	+	protein FAR-RED-ELONGATED HYPOCOTYL 1-LIKE
AT4G02440.1	F-BOX FAMILY PROTEIN	EID1	Photoperiodism, light perception and signalling	LOC115695743	XP_030478709.1	XM_030622849.1	X	NC_044370.1	12526940	12527919	-	LOW QUALITY PROTEIN: phytochrome A-associated F-box protein-like
AT4G16280.1	FCA	FCA	Ambient temperature General	LOC115724755	XP_030509953.1	XM_030654093.1	6	NC_044377.1	77430801	77438003	-	flowering time control protein FCA isoform X2
AT3G20740.1	FERTILIZATION-INDEPENDENT ENDOSPERM 1 , FERTILIZATION INDEPENDENT SEED 3	FIE1, FIS3	General	LOC115706453	XP_030489993.1	XM_030634133.1	X	NC_044370.1	21695270	21698035	+	polycomb group protein FIE1 isoform X2
AT2G21070.1	FIONA 1	FIO1	Circadian Clock	LOC115704514	XP_030487580.1	XM_030631720.1	X	NC_044370.1	16120219	16124029	-	RNA N6-adenosine-methyltransferase mettl16
AT1G68050.1	FLAVIN-BINDING, KELCH REPEAT, F BOX 1 , ADAGIO 3	FKF1, ADO3	Photoperiodism, light perception and signalling	LOC115714162	XP_030498591.1	XM_030642731.1	4	NC_044373.1	2945098	2948622	-	adagio protein 3
AT2G30120.1	FLC EXPRESSOR	FLX	Vernalization	LOC115719487	XP_030504417.1	XM_030648557.1	2	NC_044375.1	94085868	94090112	+	protein FLC EXPRESSOR isoform X1
AT1G35460.1	FLOWERING BHLH 1	FBH1	Photoperiodism, light perception and signalling	LOC115702338	XP_030485655.1	XM_030629795.1	X	NC_044370.1	104574833	104578464	+	transcription factor bHLH80
AT4G09180.1	FLOWERING BHLH 2	FBH2	Photoperiodism, light perception and signalling	LOC115702338	XP_030485655.1	XM_030629795.1	X	NC_044370.1	104574833	104578464	+	transcription factor bHLH80
AT1G51140.1	FLOWERING BHLH 3 , ABA-RESPONSIVE KINASE SUBSTRATE 1 , BASIC HELIX-LOOP-HELIX 122	FBH3, AKS1, BHLH122	Photoperiodism, light perception and signalling	LOC115719697	XP_030504702.1	XM_030648842.1	2	NC_044375.1	52300923	52302677	+	transcription factor bHLH130
AT2G42280.1	FLOWERING BHLH 4, ABA-RESPONSIVE KINASE SUBSTRATE 3	FBH4, AKS3	Photoperiodism, light perception and signalling	LOC115708713	XP_030492568.1	XM_030636708.1	3	NC_044372.1	79415112	79417200	-	transcription factor bHLH130
AT3G10390.1	FLOWERING LOCUS D , REDUCED SYSTEMIC IMMUNITY 1	FLD, RSI1	General	LOC115705930	XP_030489269.1	XM_030633409.1	1	NC_044371.1	81275564	81279058	+	protein FLOWERING LOCUS D
AT3G04610.1	FLOWERING LOCUS KH DOMAIN	FLK	General	LOC115718951	XP_030503638.1	XM_030647778.1	2	NC_044375.1	28634748	28639491	-	flowering locus K homology domain
AT5G24860.1	FLOWERING PROMOTING FACTOR 1	FPF1	Hormones	LOC115702886	XP_030486201.1	XM_030630341.1	X	NC_044370.1	89960696	89961052	-	flowering-promoting factor 1
AT4G25530.1	FLOWERING WAGENINGEN, HOMEODOMAIN GLABROUS 6	FWA, HDG6	General	LOC115716687	XP_030501399.1	XM_030645539.1	5	NC_044374.1	25254110	25259336	-	homeobox-leucine zipper protein ANTHOCYANINLESS 2 isoform X1
AT3G14750.1	FLX-LIKE 1	NA	Vernalization	LOC115706794	XP_030490385.1	XM_030634525.1	1	NC_044371.1	88188599	88190219	-	protein FLX-like 1
AT1G67170.1	FLX-LIKE 2	FLL2	Vernalization	LOC115699754	XP_030483154.1	XM_030627294.1	8	NC_044379.1	55181812	55183991	-	protein FLX-like 2
AT5G61920.1	FLX-LIKE 4, FLOWERING LOCUS C EXPRESSOR-LIKE 4	FLX4, FLL4	Vernalization	LOC115725664	XP_030511107.1	XM_030655247.1	6	NC_044377.1	40077093	40083916	-	protein FLX-like 4
AT2G43410.1	FPA	FPA	General	LOC115722256	XP_030507276.1	XM_030651416.1	9	NC_044376.1	50754502	50761122	+	flowering time control protein FPA
AT5G16320.1	FRIGIDA LIKE 1, SUPPRESSOR OF FRI 8	FRL1, SUF8	Vernalization	LOC115725481	XP_030510878.1	XM_030655018.1	6	NC_044377.1	18643359	18645770	+	truncated FRIGIDA-like protein 1
AT1G31814.1	FRIGIDA LIKE 2	FRL2	Vernalization	LOC115725481	XP_030510878.1	XM_030655018.1	6	NC_044377.1	18643359	18645770	+	truncated FRIGIDA-like protein 1
AT2G33835.1	FRIGIDA-ESSENTIAL 1	FES1	Vernalization	LOC115698043	XP_030481087.1	XM_030625227.1	7	NC_044378.1	26815713	26821670	+	protein FRIGIDA-ESSENTIAL 1 isoform X1
AT5G06850.1	FT-INTERACTING PROTEIN 1	FTIP1	Photoperiodism, light perception and signalling	LOC115698955	XP_030482029.1	XM_030626169.1	8	NC_044379.1	26949339	26951708	-	FT-interacting protein 1
AT2G19520.1	FVE , MULTICOPY SUPPRESSOR OF IRA1 4	FVE, MSI4	General	LOC115705830	XP_030489136.1	XM_030633276.1	1	NC_044371.1	25411892	25417063	-	WD-40 repeat-containing protein MSI4
AT5G13480.1	FY	FY	General	LOC115724500	XP_030509654.1	XM_030653794.1	X	NC_044370.1	84576291	84586870	+	flowering time control protein FY isoform X1		FY	Chen et al., 2022
AT3G05120.1	GA INSENSITIVE DWARF 1A	GID1A	Hormones	LOC115719219	XP_030504029.1	XM_030648169.1	2	NC_044375.1	72840442	72842172	+	gibberellin receptor GID1C
AT3G63010.1	GA INSENSITIVE DWARF 1B	GID1B	Hormones	LOC115702835	XP_030486134.1	XM_030630274.1	X	NC_044370.1	13625395	13627029	+	gibberellin receptor GID1B
AT5G27320.1	GA INSENSITIVE DWARF 1C	GID1C	Hormones	LOC115719219	XP_030504029.1	XM_030648169.1	2	NC_044375.1	72840442	72842172	+	gibberellin receptor GID1C
AT4G02780.1	GA REQUIRING 1	GA1	Hormones	LOC115703738	XP_030486833.1	XM_030630973.1	X	NC_044370.1	14622027	14633852	+	(-)-kolavenyl diphosphate synthase TPS28, chloroplastic
AT1G79460.1	GA REQUIRING 2 , ARABIDOPSIS THALIANA ENT-KAURENE SYNTHASE 1	GA2, ATKS1	Hormones	LOC115712980	XP_030497293.1	XM_030641433.1	4	NC_044373.1	22530641	22552802	-	ent-kaur-16-ene synthase, chloroplastic isoform X1
AT5G25900.1	GA REQUIRING 3	GA3, CYP701A3, ATKO1	Gibberellins Hormones	LOC115695692	XP_030478617.1	XM_030622757.1	6	NC_044377.1	76771539	76775492	-	ent-kaurene oxidase, chloroplastic
AT3G02885.1	GAST1 PROTEIN HOMOLOG 5	GASA5	Hormones	LOC115721929	XP_030506894.1	XM_030651034.1	9	NC_044376.1	11462468	11463149	-	protein RSI-1
AT5G56860	GATA, NITRATE-INDUCIBLE, CARBON-METABOLISM INVOLVED	GNC	Hormones	LOC115706129	XP_030489525.1	XM_030633665.1	1	NC_044371.1	35421561	35422872	+	LOW QUALITY PROTEIN: GATA transcription factor 21-like
AT5G38480.1	GENERAL REGULATORY FACTOR 3	GRF3	Flowering time integrator	LOC115698665	XP_030481657.1	XM_030625797.1	8	NC_044379.1	54726513	54727572	+	14-3-3-like protein A
AT2G42590.3	GENERAL REGULATORY FACTOR 9,	GF14	Flowering time integrator	LOC115701070	XP_030484622.1	XM_030628762.1	8	NC_044379.1	50173084	50175502	-	14-3-3-like protein B isoform X1
AT1G26480.1	GF14	GF14	Flowering time integrator	LOC115699377	XP_030482609.1	XM_030626749.1	8	NC_044379.1	33034241	33036396	+	14-3-3-like protein GF14 iota
AT1G14920.1	GIBBERELLIC ACID INSENSITIVE, RESTORATION ON GROWTH ON AMMONIA 2	GAI, RGA2	Hormones	LOC115712712	XP_030496910.1	XM_030641050.1	4	NC_044373.1	2378634	2380472	+	DELLA protein GAIP-B
AT4G25420.1	GIBBERELLIN 20-OXIDASE 1	GA20ox1	Hormones	LOC115715725	XP_030500252.1	XM_030644392.1	5	NC_044374.1	51398045	51399437	+	gibberellin 20 oxidase 2
AT5G51810.1	GIBBERELLIN 20-OXIDASE 2	GA20ox2	Hormones	LOC115715725	XP_030500252.1	XM_030644392.1	5	NC_044374.1	51398045	51399437	+	gibberellin 20 oxidase 2
AT5G07200.1	GIBBERELLIN 20-OXIDASE 3	GA20OX3	Hormones	LOC115715725	XP_030500252.1	XM_030644392.1	5	NC_044374.1	51398045	51399437	+	gibberellin 20 oxidase 2
AT1G78440.1	GIBBERELLIN 2-OXIDASE 1	GA2ox1	Hormones	LOC115706670	XP_030490244.1	XM_030634384.1	1	NC_044371.1	87776895	87778490	-	gibberellin 2-beta-dioxygenase 1
AT1G30040.1	GIBBERELLIN 2-OXIDASE 2	GA2ox2	Hormones	LOC115696581	XP_030479333.1	XM_030623473.1	7	NC_044378.1	67370053	67371532	-	gibberellin 2-beta-dioxygenase
AT2G34555.1	GIBBERELLIN 2-OXIDASE 3	GA2ox3	Hormones	LOC115696581	XP_030479333.1	XM_030623473.1	7	NC_044378.1	67370053	67371532	-	gibberellin 2-beta-dioxygenase
AT1G47990.1	GIBBERELLIN 2-OXIDASE 4	GA2ox4	Hormones	LOC115723423	XP_030508770.1	XM_030652910.1	9	NC_044376.1	4402911	4406826	-	gibberellin 2-beta-dioxygenase 2
AT1G02400.1	GIBBERELLIN 2-OXIDASE 6	GA2ox6	Hormones	LOC115704443	XP_030487514.1	XM_030631654.1	X	NC_044370.1	9791497	9794510	+	gibberellin 2-beta-dioxygenase 2
AT1G50960.1	GIBBERELLIN 2-OXIDASE 7	GA2ox7	Hormones	LOC115695970	XP_030478943.1	XM_030623083.1	6	NC_044377.1	29148074	29163931	-	gibberellin 2-beta-dioxygenase 8
AT4G21200.1	GIBBERELLIN 2-OXIDASE 8	GA2ox8	Hormones	LOC115704748	XP_030487812.1	XM_030631952.1	1	NC_044371.1	93687678	93691837	+	gibberellin 2-beta-dioxygenase 8
AT1G15550.1	GIBBERELLIN 3-OXIDASE 1	GA3OX1	Hormones	LOC115705300	XP_030488464.1	XM_030632604.1	1	NC_044371.1	99025920	99027384	+	gibberellin 3-beta-dioxygenase 1
AT1G80340.1	GIBBERELLIN 3-OXIDASE 2	GA3OX2	Hormones	LOC115705300	XP_030488464.1	XM_030632604.1	1	NC_044371.1	99025920	99027384	+	gibberellin 3-beta-dioxygenase 1
AT4G21690.1	GIBBERELLIN 3-OXIDASE 3	ATGA3OX3	Hormones	LOC115720796	XP_030505835.1	XM_030649975.1	2	NC_044375.1	6628123	6630925	-	gibberellin 3-beta-dioxygenase 1-like
AT1G22770.1	GIGANTEA	GI	Circadian Clock Photoperiodism, light perception and signalling	LOC115708742	XP_030492608.1	XM_030636748.1	X	NC_044370.1	27542894	27551182	-	protein GIGANTEA
AT5G63960.1	GIGANTEA SUPPRESSOR 5, EMBRYO DEFECTIVE 2780	GIS5, EMB2780	General	LOC115712618	XP_030496781.1	XM_030640921.1	4	NC_044373.1	65544262	65560170	+	DNA polymerase delta catalytic subunit
AT2G21660.1	GLYCINE-RICH RNA-BINDING PROTEIN 7, COLD, CIRCADIAN RHYTHM, AND RNA BINDING 2	GRP7, CCR2	General	LOC115714982	XP_030499617.1	XM_030643757.1	4	NC_044373.1	12784884	12785704	-	glycine-rich RNA-binding protein
AT4G26150	GNC-LIKE, CYTOKININ-RESPONSIVE GATA FACTOR 1	GNL, CGA1	Hormones	LOC115704681	XP_030487739.1	XM_030631879.1	1	NC_044371.1	48629034	48630344	-	GATA transcription factor 21
AT2G20570.1	GOLDEN2-LIKE 1, GBFS PRO-RICH REGION-INTERACTING FACTOR 1	GLK1, GPRI1	General	LOC115700524	XP_030483933.1	XM_030628073.1	8	NC_044379.1	51051694	51054671	-	transcription activator GLK1
AT5G44190.1	GOLDEN2-LIKE 2	GLK2	General	LOC115700524	XP_030483933.1	XM_030628073.1	8	NC_044379.1	51051694	51054671	-	transcription activator GLK1
AT1G78300.1	GRF2 GENERAL REGULATORY FACTOR 2	14-3-3OMEGA	Flowering time integrator	LOC115722127	XP_030507116.1	XM_030651256.1	X	NC_044370.1	81808222	81809840	+	14-3-3-like protein
AT4G29130.1	HEXOKINASE 1, GLUCOSE INSENSITIVE 2	HXK1, GIN2	Sugar	LOC115705825	XP_030489128.1	XM_030633268.1	1	NC_044371.1	77104233	77108510	-	hexokinase-1
AT2G30470.1	HIGH-LEVEL EXPRESSION OF SUGAR-INDUCIBLE GENE 2	HSI2	Vernalization	LOC115719023	XP_030503755.1	XM_030647895.1	2	NC_044375.1	87243553	87249504	-	B3 domain-containing transcription repressor VAL1
AT5G64610.1	HISTONE ACETYLTRANSFERASE OF THE MYST FAMILY 1	HAM1	General	LOC115705510	XP_030488713.1	XM_030632853.1	1	NC_044371.1	5680290	5685571	+	histone acetyltransferase of the MYST family 2
AT5G09740.1	HISTONE ACETYLTRANSFERASE OF THE MYST FAMILY 2, HISTONE ACETYLTRANSFERASE OF THE GNAT/MYST SUPERFAMILY 5, HISTONE ACETYLTRANSFERASE OF THE CBP FAMILY 11	HAM2, HAG5, HAC11	General	LOC115705510	XP_030488713.1	XM_030632853.1	1	NC_044371.1	5680290	5685571	+	histone acetyltransferase of the MYST family 2
AT5G61060.1	HISTONE DEACETYLASE 5	HDA5	General	LOC115709622	XP_030493624.1	XM_030637764.1	3	NC_044372.1	64215486	64220434	-	histone deacetylase 5
AT5G63110.1	HISTONE DEACETYLASE 6, RNA-MEDIATED TRANSCRIPTIONAL SILENCING 1	HDA6, RTS1	General	LOC115710180	XP_030494383.1	XM_030638523.1	3	NC_044372.1	5801024	5804214	+	histone deacetylase 6
AT3G44680.1	HISTONE DEACETYLASE 9	HDA9	General	LOC115719134	XP_030503922.1	XM_030648062.1	2	NC_044375.1	73945	77404	+	histone deacetylase 9
AT3G54560.1	HISTONE H2A 11	HTA11	General	LOC115716590	XP_030501312.1	XM_030645452.1	X	NC_044370.1	10923120	10923920	+	histone H2A variant 1
AT2G38810.1	HISTONE H2A 8	HTA8	General	LOC115716590	XP_030501312.1	XM_030645452.1	X	NC_044370.1	10923120	10923920	+	histone H2A variant 1
AT1G52740.1	HISTONE H2A 9	HTA9	General	LOC115702261	XP_030485570.1	XM_030629710.1	X	NC_044370.1	104213343	104214684	+	probable histone H2A variant 3
AT2G44950.1	HISTONE MONO-UBIQUITINATION 1	HUB1	General	LOC115715924	XP_030500461.1	XM_030644601.1	5	NC_044374.1	30464553	30472006	+	E3 ubiquitin-protein ligase BRE1-like 1 isoform X1
AT1G55250.1	HISTONE MONO-UBIQUITINATION 2	HUB2	General	LOC115709708	XP_030493738.1	XM_030637878.1	3	NC_044372.1	54058912	54068113	-	E3 ubiquitin-protein ligase BRE1-like 2
AT5G40490.1	HLP1	HLP1	General	LOC115699405	XP_030482656.1	XM_030626796.1	8	NC_044379.1	47678244	47698141	+	LOW QUALITY PROTEIN: nuclear pore complex protein GP210
AT4G32980.1	HOMEOBOX GENE 1	ATH1	Hormones	LOC115707291	XP_030491065.1	XM_030635205.1	X	NC_044370.1	22927176	22931183	-	homeobox protein ATH1
AT4G40060.1	HOMEOBOX PROTEIN 16 , ARABIDOPSIS THALIANA HOMEOBOX PROTEIN 16	HB16, ATHB16	Photoperiodism, light perception and signalling	LOC115715244	XP_030499944.1	XM_030644084.1	4	NC_044373.1	67794110	67795551	-	homeobox-leucine zipper protein ATHB-6
AT5G45600.1	HOMOLOG OF YEAST YAF9 A, TBP-ASSOCIATED FACTOR 14B, GLIOMAS 41	YAF9A, TAF14B, GAS41	General	LOC115725223	XP_030510526.1	XM_030654666.1	6	NC_044377.1	71879041	71882537	+	transcription initiation factor TFIID subunit 14b
AT2G31650.1	HOMOLOGUE OF TRITHORAX 1 , SET DOMAIN PROTEIN 27	ATX1, SDG27	General	LOC115722176	XP_030507171.1	XM_030651311.1	9	NC_044376.1	13852033	13864126	+	histone-lysine N-methyltransferase ATX2
AT2G48160.1	HUA2 LIKE 2	HULK2	General	LOC115716899	XP_030501681.1	XM_030645821.1	X	NC_044370.1	14011704	14030892	+	protein HUA2-LIKE 2
AT3G63070.1	HUA2 LIKE 3	HULK3	General	LOC115716899	XP_030501681.1	XM_030645821.1	X	NC_044370.1	14011704	14030892	+	protein HUA2-LIKE 2
AT3G49660	HUMAN WDR5 HOMOLOG A	WDR5A	Vernalization	LOC115712232	XP_030496354.1	XM_030640494.1	4	NC_044373.1	70033440	70035135	+	COMPASS-like H3K4 histone methylase component WDR5A
AT5G55250.2	IAA CARBOXYLMETHYLTRANSFERASE 1	AtIAMT1	Gibberellins Hormones	LOC115725140	XP_030510429.1	XM_030654569.1	6	NC_044377.1	29676547	29680737	+	indole-3-acetate O-methyltransferase 1
AT5G44160.1	INDETERMINATE DOMAIN 8, NUTCRACKER	IDD8, NUC	Sugar	LOC115698715	XP_030481720.1	XM_030625860.1	8	NC_044379.1	51243912	51246181	-	zinc finger protein MAGPIE
AT3G26744.1	INDUCER OF CBF EXPRESSION 1 , SCREAM	ICE1, SCRM	Vernalization	LOC115700779	XP_030484278.1	XM_030628418.1	8	NC_044379.1	57052662	57055105	-	transcription factor ICE1
AT3G57300.1	INOSITOL REQUIRING 80	INO80	General	LOC115710064	XP_030494242.1	XM_030638382.1	3	NC_044372.1	90100269	90108270	-	LOW QUALITY PROTEIN: chromatin-remodeling ATPase INO80
AT4G20400.1	JUMONJI 14 , PKDM7B , JUMONJI 4	JMJ14, PKDM7B, JMJ4	General	LOC115697442	XP_030480310.1	XM_030624450.1	7	NC_044378.1	32011684	32018768	-	lysine-specific demethylase JMJ18
AT3G20810.1	JUMONJI 30	JMJ30	General	LOC115721095	XP_030506201.1	XM_030650341.1	2	NC_044375.1	93725841	93728157	-	lysine-specific demethylase JMJ30
AT3G45880.1	JUMONJI 32, JUMONJI DOMAIN CONTAINING 5	JMJ32, JMJD5	General	LOC115695738	XP_030478669.1	XM_030622809.1	6	NC_044377.1	68058124	68059778	-	bifunctional peptidase and (3S)-lysyl hydroxylase JMJD7
AT2G34880.1	JUMONJI DOMAIN-CONTAINING PROTEIN 15, MATERNAL EFFECT EMBRYO ARREST 27	JMJ15, MEE27	General	LOC115697442	XP_030480310.1	XM_030624450.1	7	NC_044378.1	32011684	32018768	-	lysine-specific demethylase JMJ18
AT5G48890.1	LATE	LATE	Circadian Clock Photoperiodism, light perception and signalling	LOC115712969	XP_030497272.1	XM_030641412.1	4	NC_044373.1	89389537	89390157	+	protein LATE FLOWERING
AT1G01060.1	LATE ELONGATED HYPOCOTYL	LHY	Circadian Clock Photoperiodism, light perception and signalling	LOC115706434	XP_030489945.1	XM_030634085.1	1	NC_044371.1	42384044	42390118	-	LOW QUALITY PROTEIN: protein LHY-like
AT4G00830.1	LHP1-INTERACTING FACTOR	LIF2	General	LOC115705556	XP_030488776.1	XM_030632916.1	1	NC_044371.1	59393615	59396223	+	heterogeneous nuclear ribonucleoprotein Q
AT1G12910.1	LIGHT-REGULATED WD 1, ANTHOCYANIN11	LWD1, ATAN11	Circadian Clock	LOC115700932	XP_030484471.1	XM_030628611.1	8	NC_044379.1	56738339	56739379	-	WD repeat-containing protein LWD1
AT3G26640.1	LIGHT-REGULATED WD 2	LWD2	Circadian Clock	LOC115700932	XP_030484471.1	XM_030628611.1	8	NC_044379.1	56738339	56739379	-	WD repeat-containing protein LWD1
AT2G46260.1	LIGHT-RESPONSE BTB 1	LRB1	Vernalization	LOC115705904	XP_030489227.1	XM_030633367.1	1	NC_044371.1	79741891	79745718	+	BTB/POZ domain-containing protein POB1
AT3G61600.1	LIGHT-RESPONSE BTB 2, POZ/BTB CONTAININ G-PROTEIN 1	LRB2, POB1	Vernalization	LOC115705904	XP_030489227.1	XM_030633367.1	1	NC_044371.1	79741891	79745718	+	BTB/POZ domain-containing protein POB1
AT2G18915.1	LOV KELCH PROTEIN 2	LKP2	Circadian Clock Photoperiodism, light perception and signalling	LOC115724942	XP_030510178.1	XM_030654318.1	6	NC_044377.1	2638638	2642629	+	adagio protein 1
AT1G62830.1	LSD1-LIKE 1	LDL1	General	LOC115714021	XP_030498394.1	XM_030642534.1	X	NC_044370.1	71414136	71416589	+	lysine-specific histone demethylase 1 homolog 1
AT4G02560.1	LUMINIDEPENDENS	LD	General	LOC115723473	XP_030508854.1	XM_030652994.1	X	NC_044370.1	11891620	11898251	+	homeobox protein LUMINIDEPENDENS
AT3G46640.1	LUX ARRHYTHMO, PHYTOCLOCK 1	LUX, PCL1	Circadian Clock	LOC115718944	XP_030503633.1	XM_030647773.1	2	NC_044375.1	74055264	74056259	-	transcription factor BOA
AT4G00450.1	MEDIATOR 12, CENTER CITY, CRYPTIC PRECOCIOUS	MED12, CCT, CRP	General	LOC115706507	XP_030490033.1	XM_030634173.1	1	NC_044371.1	86584982	86595473	+	mediator of RNA polymerase II transcription subunit 12
AT1G55325.1	MEDIATOR 13, GRAND CENTRAL, MACCHI-BOU 2	MED13, GCT, MAB2	General	LOC115725279	XP_030510593.1	XM_030654733.1	6	NC_044377.1	77370751	77382049	+	mediator of RNA polymerase II transcription subunit 13
AT4G04920.1	MEDIATOR 16, SENSITIVE TO FREEZING 6	MED16, SFR6	General	LOC115698168	XP_030481209.1	XM_030625349.1	7	NC_044378.1	738443	746075	+	mediator of RNA polymerase II transcription subunit 16 isoform X1
AT2G22370.1	MEDIATOR 18	MED18	General	LOC115708190	XP_030492256.1	XM_030636396.1	1	NC_044371.1	85562211	85564391	+	mediator of RNA polymerase II transcription subunit 18
AT3G01460.1	METHYL-CPG-BINDING DOMAIN 9	MBD9	General	LOC115700835	XP_030484359.1	XM_030628499.1	8	NC_044379.1	60023583	60035202	+	methyl-CpG-binding domain-containing protein 9
None	miR172	miR172	Aging	LOC115721269	csa-miR172a/b/e/g	XR_004012416.1	2	NC_044375.1	39596938	39597338	+	uncharacterized LOC115721269, transcript variant X1
None	miR172	miR172	Aging	LOC115705977	csa-miR172c/d/f	XR_004009550.1	1	NC_044371.1	81123772	81124095	-	uncharacterized LOC115705977
AT4G24680.1	MODIFIER OF SNC1	MOS1	General	LOC115709416	XP_030493375.1	XM_030637515.1	3	NC_044372.1	30029999	30038691	+	protein MODIFIER OF SNC1 1 isoform X1
AT4G37280.1	MORF RELATED GENE1	MRG1	General	LOC115702752	XP_030486043.1	XM_030630183.1	X	NC_044370.1	1501899	1505386	-	protein MRG1 isoform X1
AT1G02740.1	MORF RELATED GENE2	MRG2	General	LOC115702752	XP_030486043.1	XM_030630183.1	X	NC_044370.1	1501899	1505386	-	protein MRG1 isoform X1
AT5G58230.1	MULTICOPY SUPRESSOR OF IRA1	MSI1	General	LOC115697419	XP_030480272.1	XM_030624412.1	7	NC_044378.1	57858330	57862613	+	WD-40 repeat-containing protein MSI1
AT3G28910.1	MYB DOMAIN PROTEIN 30	MYB30	General	LOC115710324	XP_030494553.1	XM_030638693.1	3	NC_044372.1	19811167	19812851	-	myb-related protein 306
AT5G18240.1	MYB-RELATED PROTEIN 1	MYR1	Photoperiodism, light perception and signalling	LOC115721754	XP_030506691.1	XM_030650831.1	9	NC_044376.1	58454637	58456839	+	myb-related protein 2 isoform X3
AT3G04030.1	MYB-RELATED PROTEIN 2	MYR2	Photoperiodism, light perception and signalling	LOC115721754	XP_030506691.1	XM_030650831.1	9	NC_044376.1	58454637	58456839	+	myb-related protein 2 isoform X3
AT5G64170.1	NIGHT LIGHT-INDUCIBLE AND CLOCK-REGULATED 1	LNK1	Circadian Clock	LOC115725033	XP_030510305.1	XM_030654445.1	6	NC_044377.1	67013935	67023656	-	protein LNK1 isoform X2
AT3G54500.1	NIGHT LIGHT-INDUCIBLE AND CLOCK-REGULATED 2	LNK2	Circadian Clock	LOC115706648	XP_030490225.1	XM_030634365.1	1	NC_044371.1	27146916	27156285	-	protein LNK2
AT4G03090.1	NODULIN HOMEOBOX	AtNDX	General	LOC115720249	XP_030505357.1	XM_030649497.1	X	NC_044370.1	11456552	11464076	-	nodulin homeobox isoform X2
AT5G12840.1	NUCLEAR FACTOR Y SUBUNIT A1, HEME ACTIVATOR PROTEIN (YEAST) HOMOLOG 2A	NF-YA1, HAP2B	Photoperiodism, light perception and signalling	LOC115711680	XP_030495918.1	XM_030640058.1	3	NC_044372.1	1633048	1635821	-	nuclear transcription factor Y subunit A-7
AT2G34720.1	NUCLEAR FACTOR Y SUBUNIT A4	NF-YA4	Photoperiodism, light perception and signalling	LOC115697218	XP_030480001.1	XM_030624141.1	7	NC_044378.1	63183282	63186320	-	nuclear transcription factor Y subunit A-7
AT5G47640.1	NUCLEAR FACTOR Y, SUBUNIT B2 , HEME ACTIVATOR PROTEIN (YEAST) HOMOLOG 3B	NF-YB2, HAP3B	Photoperiodism, light perception and signalling	LOC115704882	XP_030487954.1	XM_030632094.1	1	NC_044371.1	91077127	91077723	-	nuclear transcription factor Y subunit B-3
AT4G14540.1	NUCLEAR FACTOR Y, SUBUNIT B3, HEME ACTIVATOR PROTEIN (YEAST) HOMOLOG 3C	NF-YB3, HAP3C	Photoperiodism, light perception and signalling	LOC115704882	XP_030487954.1	XM_030632094.1	1	NC_044371.1	91077127	91077723	-	nuclear transcription factor Y subunit B-3
AT1G54830.1	NUCLEAR FACTOR Y, SUBUNIT C3	NF-YC3	Photoperiodism, light perception and signalling	LOC115722631	XP_030507749.1	XM_030651889.1	9	NC_044376.1	41529685	41530446	+	nuclear transcription factor Y subunit C-9
AT5G63470.1	NUCLEAR FACTOR Y, SUBUNIT C4	NF-YC4	Photoperiodism, light perception and signalling	LOC115710181	XP_030494384.1	XM_030638524.1	3	NC_044372.1	7585126	7587405	+	nuclear transcription factor Y subunit C-4
AT1G08970.1	NUCLEAR FACTOR Y, SUBUNIT C9 , HEME ACTIVATOR PROTEIN (YEAST) HOMOLOG 5C	NF-YC9, HAP5C	Photoperiodism, light perception and signalling	LOC115722631	XP_030507749.1	XM_030651889.1	9	NC_044376.1	41529685	41530446	+	nuclear transcription factor Y subunit C-9
AT1G60220.1	OVERLY TOLERANT TO SALT 1, UB-LIKE PROTEASE 1D	OTS1, ULP1D	General	LOC115712544	XP_030496699.1	XM_030640839.1	4	NC_044373.1	3611248	3617491	+	ubiquitin-like-specific protease 1D isoform X2
AT1G10570.1	OVERLY TOLERANT TO SALT 2	OTS2	General	LOC115712544	XP_030496699.1	XM_030640839.1	4	NC_044373.1	3611248	3617491	+	ubiquitin-like-specific protease 1D isoform X2
AT5G51820.1	PHOSPHOGLUCOMUTASE	PGM1	Sugar	LOC115712769	XP_030496986.1	XM_030641126.1	4	NC_044373.1	2218163	2224980	-	phosphoglucomutase, cytoplasmic
AT4G24620.1	PHOSPHOGLUCOSE ISOMERASE 1	PGI1	Sugar	LOC115711259	XP_030495459.1	XM_030639599.1	X	NC_044370.1	44805582	44809800	-	glucose-6-phosphate isomerase 1, chloroplastic
AT3G12810.1	PHOTOPERIOD-INDEPENDENT EARLY FLOWERING 1	PIE1	General	LOC115699574	XP_030482912.1	XM_030627052.1	8	NC_044379.1	25734289	25742149	+	protein PHOTOPERIOD-INDEPENDENT EARLY FLOWERING 1
AT3G45780.1	PHOTOTROPIN 1	PHOT1	Photoperiodism, light perception and signalling	LOC115720676	XP_030505703.1	XM_030649843.1	2	NC_044375.1	91852068	91865107	-	phototropin-1 isoform X1
AT1G09570.1	PHYTOCHROME A	PHYA	Photoperiodism, light perception and signalling	LOC115719277	XP_030504112.1	XM_030648252.1	2	NC_044375.1	89780991	89785122	-	phytochrome A
AT1G25540.1	PHYTOCHROME AND FLOWERING TIME 1, MEDIATOR25	PFT1, MED25	Photoperiodism, light perception and signalling	LOC115699078	XP_030482153.1	XM_030626293.1	8	NC_044379.1	35428846	35438031	+	mediator of RNA polymerase II transcription subunit 25 isoform X1
AT2G18790.1	PHYTOCHROME B	PHYB	Photoperiodism, light perception and signalling	LOC115721719	XP_030506649.1	XM_030650789.1	9	NC_044376.1	5101713	5105970	-	phytochrome B isoform X2
AT5G35840.1	PHYTOCHROME C	PHYC	Photoperiodism, light perception and signalling	LOC115719277	XP_030504112.1	XM_030648252.1	2	NC_044375.1	89780991	89785122	-	phytochrome A
AT4G16250.1	PHYTOCHROME D	PHYD	Photoperiodism, light perception and signalling	LOC115721719	XP_030506649.1	XM_030650789.1	9	NC_044376.1	5101713	5105970	-	phytochrome B isoform X2
AT4G18130.1	PHYTOCHROME E	PHYE	Photoperiodism, light perception and signalling	LOC115697533	XP_030480443.1	XM_030624583.1	7	NC_044378.1	68477606	68481727	-	phytochrome E
AT2G43010.1	PHYTOCHROME INTERACTING FACTOR 4	PIF4	Ambient temperature	LOC115699678	XP_030483060.1	XM_030627200.1	8	NC_044379.1	58600760	58603842	-	transcription factor PIF5
AT2G02950.1	PHYTOCHROME KINASE SUBSTRATE 1	PKS1	Photoperiodism, light perception and signalling	LOC115698543	XP_030481484.1	XM_030625624.1	8	NC_044379.1	36244569	36246038	+	protein PHYTOCHROME KINASE SUBSTRATE 1
AT5G04190.1	PHYTOCHROME KINASE SUBSTRATE 4	PKS4	Photoperiodism, light perception and signalling	LOC115723926	XP_030509247.1	XM_030653387.1	9	NC_044376.1	60266258	60268078	-	protein PHYTOCHROME KINASE SUBSTRATE 4 isoform X1
AT1G72390.1	PHYTOCHROME-DEPENDENT LATE-FLOWERING	PHL	Photoperiodism, light perception and signalling	LOC115707127	XP_030490845.1	XM_030634985.1	1	NC_044371.1	90175779	90183823	+	protein PHYTOCHROME-DEPENDENT LATE-FLOWERING
AT3G59060.1	PHYTOCHROME-INTERACTING FACTOR 5, PHYTOCHROME INTERACTING FACTOR 3-LIKE 6	PIF5, PIL6	Ambient temperature	LOC115699678	XP_030483060.1	XM_030627200.1	8	NC_044379.1	58600760	58603842	-	transcription factor PIF5
AT3G22590.1	PLANT HOMOLOGOUS TO PARAFIBROMIN , CDC73	PHP, CDC73	Vernalization	LOC115723135	XP_030508423.1	XM_030652563.1	9	NC_044376.1	33712342	33713842	+	protein CDC73 homolog
AT2G28830.1	PLANT U-BOX 12	PUB12	General	LOC115718686	XP_030503367.1	XM_030647507.1	2	NC_044375.1	75094538	75098714	-	U-box domain-containing protein 13
AT3G46510.1	PLANT U-BOX 13	PUB13	General	LOC115718686	XP_030503367.1	XM_030647507.1	2	NC_044375.1	75094538	75098714	-	U-box domain-containing protein 13
AT1G80070.1	PRE-MRNA PROCESSING 8, ABNORMAL SUSPENSOR 2, EMBRYO DEFECTIVE 33	PRP8, SUS2, EMB33	General	LOC115705238	XP_030488376.1	XM_030632516.1	1	NC_044371.1	99642202	99652555	+	pre-mRNA-processing-splicing factor 8A
AT5G49020.1	PROTEIN ARGININE METHYLTRANSFERASE 4A	PRMT4A	General	LOC115722623	XP_030507738.1	XM_030651878.1	9	NC_044376.1	7988334	7994356	-	probable histone-arginine methyltransferase 1.4 isoform X1
AT4G14480.1	PROTEIN KINASE SUPERFAMILY PROTEIN	BLUS1	Photoperiodism, light perception and signalling	LOC115722043	XP_030507025.1	XM_030651165.1	9	NC_044376.1	27422999	27426292	+	serine/threonine-protein kinase BLUS1
AT5G24470.1	PSEUDO-RESPONSE REGULATOR 5	PRR5	Circadian Clock	LOC115716206	XP_030500808.1	XM_030644948.1	5	NC_044374.1	623977	627264	+	two-component response regulator-like APRR3
AT2G46790.1	PSEUDO-RESPONSE REGULATOR 9	PRR9	Circadian Clock	LOC115716206	XP_030500808.1	XM_030644948.1	5	NC_044374.1	623977	627264	+	two-component response regulator-like APRR3
AT3G03140.1	PWWP-DOMAIN INTERACTOR OF POLYCOMBS1	PWO1	Vernalization	LOC115715773	XP_030500304.1	XM_030644444.1	5	NC_044374.1	2330123	2334063	-	uncharacterized protein At1g51745 isoform X1
AT1G32230.1	RADICAL-INDUCED CELL DEATH 1	RCD1	General	LOC115712941	XP_030497231.1	XM_030641371.1	4	NC_044373.1	88642805	88647233	+	probable inactive poly [ADP-ribose] polymerase SRO1 isoform X1
AT2G47700.1	RED AND FAR-RED INSENSITIVE 2	RFI2	Photoperiodism, light perception and signalling	LOC115695269	XP_030478222.1	XM_030622362.1	X	NC_044370.1	12521410	12524741	+	E3 ubiquitin-protein ligase RFI2-like
AT3G18990.1	REDUCED VERNALIZATION RESPONSE 1	VRN1	Vernalization	LOC115703204	XP_030486582.1	XM_030630722.1	X	NC_044370.1	6929565	6932882	-	B3 domain-containing transcription factor VRN1
AT4G16845.1	REDUCED VERNALIZATION RESPONSE 2	VRN2	Vernalization	LOC115717209	XP_030502030.1	XM_030646170.1	5	NC_044374.1	79158187	79171648	-	polycomb group protein EMBRYONIC FLOWER 2
AT3G48430.1	RELATIVE OF EARLY FLOWERING 6 , JUMONJI DOMAIN-CONTAINING PROTEIN 12	REF6, JMJ12	General	LOC115708673	XP_030492514.1	XM_030636654.1	3	NC_044372.1	10472560	10478581	-	lysine-specific demethylase REF6
AT2G01570.1	REPRESSOR OF GA1-3 1	RGA1	Hormones	LOC115712712	XP_030496910.1	XM_030641050.1	4	NC_044373.1	2378634	2380472	+	DELLA protein GAIP-B
AT5G23730.1	REPRESSOR OF UV-B PHOTOMORPHOGENESIS 2, EARLY FLOWERING BY OVEREXPRESSION 2	RUP2, EFO2	Photoperiodism, light perception and signalling	LOC115699438	XP_030482711.1	XM_030626851.1	8	NC_044379.1	45962491	45968170	+	E3 ubiquitin-protein ligase COP1
AT5G37260.1	REVEILLE 2, CIRCADIAN 1	RVE2, CIR1	Circadian Clock	LOC115714271	XP_030498766.1	XM_030642906.1	4	NC_044373.1	18400537	18403006	-	protein REVEILLE 7 isoform X1
AT5G52660.1	REVEILLE 6	RVE6	Circadian Clock	LOC115702140	XP_030485456.1	XM_030629596.1	NA	NW_022060462.1	90809	94526	+	protein REVEILLE 6-like
AT1G66350.1	RGA-LIKE PROTEIN 1	RGL1	Hormones	LOC115712712	XP_030496910.1	XM_030641050.1	4	NC_044373.1	2378634	2380472	+	DELLA protein GAIP-B
AT3G03450.1	RGA-LIKE PROTEIN 2	RGL2	Hormones	LOC115712712	XP_030496910.1	XM_030641050.1	4	NC_044373.1	2378634	2380472	+	DELLA protein GAIP-B
AT5G17490.1	RGA-LIKE PROTEIN 3	RGL3	Hormones	LOC115712712	XP_030496910.1	XM_030641050.1	4	NC_044373.1	2378634	2380472	+	DELLA protein GAIP-B
AT4G08685.1	SAH7	SAH7	General	LOC115702010	XP_030485335.1	XM_030629475.1	X	NC_044370.1	103896472	103897565	-	protein DOWNSTREAM OF FLC
AT1G06040.1	SALT TOLERANCE	STO	Photoperiodism, light perception and signalling	LOC115721967	XP_030506950.1	XM_030651090.1	9	NC_044376.1	50221840	50223894	-	B-box zinc finger protein 24 isoform X2
AT1G75060.1	SAP30 FUNCTION-RELATED 1	AFR1	Photoperiodism, light perception and signalling	LOC115700434	XP_030483837.1	XM_030627977.1	X	NC_044370.1	101573806	101576547	-	uncharacterized protein LOC115700434
AT1G19330.1	SAP30 FUNCTION-RELATED 2	AFR2	Photoperiodism, light perception and signalling	LOC115700434	XP_030483837.1	XM_030627977.1	X	NC_044370.1	101573806	101576547	-	uncharacterized protein LOC115700434
AT5G59560.1	SENSITIVITY TO RED LIGHT REDUCED 1	SRR1	Circadian Clock Photoperiodism, light perception and signalling	LOC115697192	XP_030479965.1	XM_030624105.1	7	NC_044378.1	64950777	64951640	+	protein SENSITIVITY TO RED LIGHT REDUCED 1
AT5G37055.1	SERRATED LEAVES AND EARLY FLOWERING, ATSWC6	SEF, SWC6	General	LOC115719643	XP_030504620.1	XM_030648760.1	2	NC_044375.1	82149933	82151065	+	SWR1 complex subunit 6
AT1G76710.1	SET DOMAIN GROUP 26, ASH1-RELATED PROTEIN 1	SDG26, ASHH1	General	LOC115708212	XP_030492287.1	XM_030636427.1	X	NC_044370.1	27186133	27201922	+	histone-lysine N-methyltransferase ASHH1
AT2G44150.1	SET DOMAIN-CONTAINING PROTEIN 7, HISTONE-LYSINE N-METHYLTRANSFERASE ASHH3	SDG7, ASSH3	Vernalization	LOC115722930	XP_030508171.1	XM_030652311.1	9	NC_044376.1	26087156	26093363	-	histone-lysine N-methyltransferase ASHH3 isoform X1
AT4G39100.1	SHORT LIFE1 , SHORT LIFE	SHL1, SHL	General	LOC115695773	XP_030478708.1	XM_030622848.1	6	NC_044377.1	74465769	74467764	-	chromatin remodeling protein SHL
AT2G35510.1	SIMILAR TO RCD ONE 1	SRO1	General	LOC115712941	XP_030497231.1	XM_030641371.1	4	NC_044373.1	88642805	88647233	+	probable inactive poly [ADP-ribose] polymerase SRO1 isoform X1
AT2G47310.1	SISTER OF FCA	NA	Ambient temperature General	LOC115709584	XP_030493610.1	XM_030637750.1	X	NC_044370.1	9560006	9564268	-	flowering time control protein FCA isoform X1
AT4G24210.1	SLEEPY1	SLY1	Hormones	LOC115712738	XP_030496948.1	XM_030641088.1	4	NC_044373.1	30468523	30469083	-	F-box protein GID2
AT5G48170.1	SLY2	SLY2	Gibberellins	LOC115698964	XP_030482039.1	XM_030626179.1	8	NC_044379.1	42165021	42165500	-	F-box protein SNE
AT2G02090.1	SNF2 DOMAIN-CONTAINING PROTEIN / HELICASE DOMAIN-CONTAINING PROTEIN	CHA19	Vernalization	LOC115722240	XP_030507255.1	XM_030651395.1	9	NC_044376.1	55596522	55605055	+	protein CHROMATIN REMODELING 19
AT2G46340.1	SPA1-RELATED 1	SPA1	Photoperiodism, light perception and signalling	LOC115721945	XP_030506912.1	XM_030651052.1	9	NC_044376.1	60212330	60217652	+	protein SPA1-RELATED 2
AT3G15354.1	SPA1-RELATED 3	SPA3	Photoperiodism, light perception and signalling	LOC115706381	XP_030489874.1	XM_030634014.1	1	NC_044371.1	85827403	85831935	+	protein SPA1-RELATED 3 isoform X1
AT1G53090.1	SPA1-RELATED 4	SPA4	Photoperiodism, light perception and signalling	LOC115706381	XP_030489874.1	XM_030634014.1	1	NC_044371.1	85827403	85831935	+	protein SPA1-RELATED 3 isoform X1
AT4G10710.1	SPT16	SPT16	General	LOC115718725	XP_030503411.1	XM_030647551.1	2	NC_044375.1	92753941	92757141	-	FACT complex subunit SPT16
AT3G28730.1	STRUCTURE SPECIFIC RECOGNITION PROTEIN 1, HIGH MOBILITY GROUP, NUCLEOSOME/CHROMATIN ASSEMBLY FACTOR D	SSRP1, HMG, NFD	General	LOC115698505	XP_030481443.1	XM_030625583.1	8	NC_044379.1	61027899	61034329	-	FACT complex subunit SSRP1
AT2G23740.1	SU(VAR)3-9-RELATED PROTEIN 5	SUVR5	General	LOC115712782	XP_030497002.1	XM_030641142.1	4	NC_044373.1	83166960	83174509	+	histone-lysine N-methyltransferase SUVR5 isoform X1
AT3G43190.1	SUCROSE SYNTHASE 4	SUS4	Sugar	LOC115705483	XP_030488683.1	XM_030632823.1	1	NC_044371.1	68154769	68158357	-	LOW QUALITY PROTEIN: sucrose synthase
AT5G06170.1	SUCROSE-PROTON SYMPORTER 9	SUC9	Sugar	LOC115705246	XP_030488390.1	XM_030632530.1	X	NC_044370.1	17797565	17800863	-	sucrose transport protein
AT1G30970.1	SUPPRESSOR OF FRIGIDA4	SUF4	Vernalization	LOC115697160	XP_030479926.1	XM_030624066.1	7	NC_044378.1	45976173	45981993	+	protein SUPPRESSOR OF FRI 4
AT4G02020.1	SWINGER/EZA	EZA1	Vernalization	LOC115707433	XP_030491292.1	XM_030635432.1	X	NC_044370.1	9238080	9243265	-	histone-lysine N-methyltransferase EZA1 isoform X1
AT5G67180.1	TARGET OF EARLY ACTIVATION TAGGED 3	TOE3	Aging Photoperiodism, light perception and signalling	LOC115712803	XP_030497033.1	XM_030641173.1	4	NC_044373.1	79591880	79594668	-	floral homeotic protein APETALA 2 isoform X1
AT1G49950.2	TELOMERE REPEAT BINDING FACTOR 1,	ATTRB1	Vernalization	LOC115703107	XP_030486464.1	XM_030630604.1	X	NC_044370.1	5210247	5220317	-	telomere repeat-binding factor 1
AT5G67580.2	TELOMERE REPEAT BINDING FACTOR 2	ATTBP3	Vernalization	LOC115714046	XP_030498429.1	XM_030642569.1	4	NC_044373.1	77544661	77547479	-	telomere repeat-binding factor 2 isoform X3
AT1G25560.1	TEMPRANILLO 1 , ETHYLENE RESPONSE DNA BINDING FACTOR 1	TEM1, EDF1	Photoperiodism, light perception and signalling	LOC115699321	XP_030482529.1	XM_030626669.1	8	NC_044379.1	35201169	35202356	+	AP2/ERF and B3 domain-containing transcription factor RAV1
AT1G68840.1	TEMPRANILLO 2 , RELATED TO ABI3/VP1 2	TEM2, RAV2	Ambient temperature Photoperiodism, light perception and signalling	LOC115699321	XP_030482529.1	XM_030626669.1	8	NC_044379.1	35201169	35202356	+	AP2/ERF and B3 domain-containing transcription factor RAV1
AT5G17690.1	TERMINAL FLOWER 2, LIKE HETEROCHROMATIN PROTEIN 1	TFL2, LHP1	General	LOC115697325	XP_030480142.1	XM_030624282.1	X	NC_044370.1	89471034	89473535	-	chromo domain-containing protein LHP1
AT5G61380.1	TIMING OF CAB EXPRESSION 1	TOC1	Circadian Clock	LOC115711591	XP_030495816.1	XM_030639956.1	3	NC_044372.1	20334400	20344338	-	two-component response regulator-like APRR1
AT1G15750.1	TOPLESS	TPL	Aging Photoperiodism, light perception and signalling	LOC115707885	XP_030491837.1	XM_030635977.1	1	NC_044371.1	99830825	99836847	-	protein TOPLESS
AT1G78580.1	TREHALOSE-6-PHOSPHATE SYNTHASE 1	TPS1	Sugar	LOC115706813	XP_030490413.1	XM_030634553.1	1	NC_044371.1	88261215	88267592	-	alpha,alpha-trehalose-phosphate synthase [UDP-forming] 1
AT1G05830.1	TRITHORAX-LIKE PROTEIN 2	ATX2	General	LOC115722176	XP_030507171.1	XM_030651311.1	9	NC_044376.1	13852033	13864126	+	histone-lysine N-methyltransferase ATX2
AT1G14400.1	UBIQUITIN CARRIER PROTEIN 1	UBC1	General	LOC115700512	XP_030483918.1	XM_030628058.1	8	NC_044379.1	8673212	8675020	-	ubiquitin-conjugating enzyme E2 2
AT2G02760.1	UBIQUITIN CARRIER PROTEIN 2	UBC2	General	LOC115700512	XP_030483918.1	XM_030628058.1	8	NC_044379.1	8673212	8675020	-	ubiquitin-conjugating enzyme E2 2
AT5G06600.1	UBIQUITIN-SPECIFIC PROTEASE 12	UBP12	General	LOC115700507	XP_030483913.1	XM_030628053.1	8	NC_044379.1	43785301	43794552	+	ubiquitin carboxyl-terminal hydrolase 13 isoform X2
AT3G11910.1	UBIQUITIN-SPECIFIC PROTEASE 13	UBP13	General	LOC115700507	XP_030483913.1	XM_030628053.1	8	NC_044379.1	43785301	43794552	+	ubiquitin carboxyl-terminal hydrolase 13 isoform X2
AT3G49600.1	UBIQUITIN-SPECIFIC PROTEASE 26	UBP26	General	LOC115697495	XP_030480402.1	XM_030624542.1	X	NC_044370.1	90331103	90339266	+	ubiquitin carboxyl-terminal hydrolase 26 isoform X2
AT2G30140.1	UDP-GLUCOSYL TRANSFERASE 87A2	UGT87A2	General	LOC115721207	XP_030506325.1	XM_030650465.1	2	NC_044375.1	44190393	44193275	-	UDP-glycosyltransferase 87A1
AT4G28190.1	ULTRAPETALA1	ULT1	Flower development and meristem identity	LOC115699475	XP_030482766.1	XM_030626906.1	8	NC_044379.1	54152551	54155695	+	protein ULTRAPETALA 1
AT1G57820.1	VARIANT IN METHYLATION 1, ORTHRUS 2	VIM1, ORTH2	General	LOC115712505	XP_030496652.1	XM_030640792.1	4	NC_044373.1	32334231	32338364	-	E3 ubiquitin-protein ligase ORTHRUS 2
AT1G66050.1	VARIANT IN METHYLATION 2	VIM2	General	LOC115712505	XP_030496652.1	XM_030640792.1	4	NC_044373.1	32334231	32338364	-	E3 ubiquitin-protein ligase ORTHRUS 2
AT5G39550.1	VARIANT IN METHYLATION 3, ORTHRUS 1	VIM3, ORTH1	General	LOC115712505	XP_030496652.1	XM_030640792.1	4	NC_044373.1	32334231	32338364	-	E3 ubiquitin-protein ligase ORTHRUS 2
AT1G28520.1	VASCULAR PLANT ONE ZINC FINGER PROTEIN 1	VOZ1	Photoperiodism, light perception and signalling	LOC115697509	XP_030480400.1	XM_030624540.1	7	NC_044378.1	24582912	24585261	-	transcription factor VOZ1 isoform X1
AT2G42400.1	VASCULAR PLANT ONE ZINC FINGER PROTEIN 2	VOZ2	Photoperiodism, light perception and signalling	LOC115699585	XP_030482932.1	XM_030627072.1	8	NC_044379.1	51467493	51469328	+	transcription factor VOZ1
AT4G29830.1	VERNALIZATION INDEPENDENCE 3 , ARABIDOPSIS THALIANA HOMOLOG OF YEAST SKI8	VIP3, SKI8	General	LOC115707890	XP_030491843.1	XM_030635983.1	1	NC_044371.1	50441857	50443486	+	WD repeat-containing protein VIP3
AT1G61040.1	VERNALIZATION INDEPENDENCE 5	VIP5	General	LOC115697079	XP_030479849.1	XM_030623989.1	7	NC_044378.1	680831	682846	-	protein RTF1 homolog
AT5G57380.1	VERNALIZATION INSENSITIVE 3	VIN3	Vernalization	LOC115724994	XP_030510245.1	XM_030654385.1	6	NC_044377.1	2897058	2900546	-	VIN3-like protein 2 isoform X1
AT3G24440.1	VIN3-LIKE 1, VERNALIZATION 5	VIL1, VRN5	Vernalization	LOC115705198	XP_030488315.1	XM_030632455.1	1	NC_044371.1	5266405	5269273	-	VIN3-like protein 1 isoform X1
AT4G30200.1	VIN3-LIKE 2, VERNALIZATION5/VIN3-LIKE 1	VIL2, VEL1	General Vernalization	LOC115724994	XP_030510245.1	XM_030654385.1	6	NC_044377.1	2897058	2900546	-	VIN3-like protein 2 isoform X1
AT2G18880.1	VIN3-LIKE 3 , VERNALIZATION5/VIN3-LIKE 2	VIL3, VEL2	Vernalization	LOC115724994	XP_030510245.1	XM_030654385.1	6	NC_044377.1	2897058	2900546	-	VIN3-like protein 2 isoform X1
AT4G26440.1	WRKY DNA-BINDING PROTEIN 34 , MICROSPORE-SPECIFIC PROMOTER 3	WRKY34, MSP3	Vernalization	LOC115725114	XP_030510403.1	XM_030654543.1	6	NC_044377.1	89736	92600	+	probable WRKY transcription factor 2
AT2G21150.1	XAP5 CIRCADIAN TIMEKEEPER	XCT	Circadian Clock	LOC115704391	XP_030487462.1	XM_030631602.1	X	NC_044370.1	15915621	15919185	+	protein XAP5 CIRCADIAN TIMEKEEPER
AT5G57360.1	ZEITLUPE	ZTL	Circadian Clock Photoperiodism, light perception and signalling	LOC115724942	XP_030510178.1	XM_030654318.1	6	NC_044377.1	2638638	2642629	+	adagio protein 1
None	NA	NA	Gibberellins Hormones	LOC115694716	XP_030477668.1	XM_030621808.1	X	NC_044370.1	87382217	87385097	+	gibberellin 20 oxidase 1-D-like
None	NA	NA	Photoperiodism, light perception and signalling	LOC115695661	XP_030478612.1	XM_030622752.1	X	NC_044370.1	12371568	12372548	-	phytochrome A-associated F-box protein
None	NA	NA	Flowering time integrator	LOC115696654	XP_030479405.1	XM_030623545.1	7	NC_044378.1	55366778	55367965	-	14-3-3-like protein B
None	NA	NA	Vernalization	LOC115697055	XP_030479821.1	XM_030623961.1	7	NC_044378.1	4392047	4393136	+	B3 domain-containing transcription factor VRN1
None	NA	NA	Circadian Clock Photoperiodism, light perception and signalling	LOC115697482	XP_030480365.1	XM_030624505.1	7	NC_044378.1	280007	283744	-	protein EARLY FLOWERING 3
None	NA	NA	Vernalization	LOC115698692	XP_030481690.1	XM_030625830.1	8	NC_044379.1	48244474	48248682	+	protein FLX-like 3 isoform X1
None	NA	NA	Gibberellins	LOC115698988	XP_030482061.1	XM_030626201.1	8	NC_044379.1	57242300	57245295	-	GRAS family protein RAM1-like
None	NA	NA	Circadian Clock	LOC115699632	XP_030482996.1	XM_030627136.1	8	NC_044379.1	57318446	57319435	-	transcription factor TCP20
None	NA	NA	Photoperiodism, light perception and signalling	LOC115699851	XP_030483254.1	XM_030627394.1	8	NC_044379.1	12911029	12913054	+	protein SUPPRESSOR OF PHYA-105 1
None	NA	NA	Vernalization	LOC115702779	XP_030486075.1	XM_030630215.1	X	NC_044370.1	1806529	1808636	-	FRIGIDA-like protein 3
None	NA	NA	Vernalization	LOC115702803	XP_030486099.1	XM_030630239.1	X	NC_044370.1	2000521	2002610	+	FRIGIDA-like protein 3
None	NA	NA	Gibberellins	LOC115703501	XP_030486644.1	XM_030630784.1	X	NC_044370.1	14178218	14181019	+	F-box protein At2g27310
None	NA	NA	Circadian Clock	LOC115704169	XP_030487244.1	XM_030631384.1	1	NC_044371.1	58840241	58843632	-	two-component response regulator-like PRR95
None	NA	NA	Hormones	LOC115704439	XP_030487507.1	XM_030631647.1	1	NC_044371.1	87554621	87555996	+	gibberellin 20 oxidase 1-D
None	NA	NA	Hormones	LOC115704454	XP_030487522.1	XM_030631662.1	1	NC_044371.1	83955823	83959357	+	gibberellin 3-beta-dioxygenase 3-like
None	NA	NA	Circadian Clock	LOC115705125	XP_030488223.1	XM_030632363.1	1	NC_044371.1	58676484	58681375	-	two-component response regulator-like PRR95 isoform X1
None	NA	NA	Hormones	LOC115706034	XP_030489395.1	XM_030633535.1	1	NC_044371.1	81930207	81932867	-	protein DMR6-LIKE OXYGENASE 2-like
None	NA	NA	Hormones	LOC115706185	XP_030489603.1	XM_030633743.1	1	NC_044371.1	84064283	84065899	-	DELLA protein SLR1
None	NA	NA	Circadian Clock	LOC115706412	XP_030489918.1	XM_030634058.1	1	NC_044371.1	86027080	86030066	+	uncharacterized protein LOC115706412
None	NA	NA	Vernalization	LOC115706884	XP_030490506.1	XM_030634646.1	1	NC_044371.1	88724126	88732117	-	B3 domain-containing protein Os07g0563300
None	NA	NA	Flower development and meristem identity Flowering time integrator	LOC115707008	XP_030490663.1	XM_030634803.1	1	NC_044371.1	19143413	19144475	-	protein UPSTREAM OF FLC
None	NA	NA	Circadian Clock Photoperiodism, light perception and signalling	LOC115707067	XP_030490756.1	XM_030634896.1	1	NC_044371.1	89723384	89723728	-	protein ELF4-LIKE 4
None	NA	NA	Photoperiodism, light perception and signalling	LOC115707394	XP_030491211.1	XM_030635351.1	1	NC_044371.1	91927219	91931938	+	E3 ubiquitin-protein ligase COP1 isoform X1
None	NA	NA	Vernalization	LOC115707622	XP_030491496.1	XM_030635636.1	1	NC_044371.1	94755850	94759124	-	uncharacterized protein At1g51745 isoform X1
None	NA	NA	Vernalization	LOC115707654	XP_030491537.1	XM_030635677.1	1	NC_044371.1	6022587	6024922	+	FRIGIDA-like protein 4a
None	NA	NA	Circadian Clock Photoperiodism, light perception and signalling	LOC115707722	XP_030491612.1	XM_030635752.1	1	NC_044371.1	55900100	55900453	-	protein ELF4-LIKE 3
None	NA	NA	Photoperiodism, light perception and signalling	LOC115708685	XP_030492529.1	XM_030636669.1	3	NC_044372.1	3814849	3816643	+	transcription factor bHLH137 isoform X1
None	NA	NA	Circadian Clock Photoperiodism, light perception and signalling	LOC115708831	XP_030492707.1	XM_030636847.1	3	NC_044372.1	58279056	58280600	+	protein PHYTOCHROME KINASE SUBSTRATE 3
None	NA	NA	Circadian Clock Photoperiodism, light perception and signalling	LOC115709380	XP_030493326.1	XM_030637466.1	3	NC_044372.1	83150372	83153000	-	transcription factor bHLH79 isoform X1
None	NA	NA	Flowering time integrator	LOC115710214	XP_030494420.1	XM_030638560.1	3	NC_044372.1	85373497	85373868	-	14-3-3 protein 3-like
None	NA	NA	Gibberellins	LOC115710887	XP_030495101.1	XM_030639241.1	X	NC_044370.1	40675037	40679036	-	ent-kaurenoic acid oxidase 2
None	NA	NA	Circadian Clock Photoperiodism, light perception and signalling	LOC115711708	XP_030495955.1	XM_030640095.1	3	NC_044372.1	83585511	83590400	-	protein EARLY FLOWERING 5 isoform X1
None	NA	NA	Gibberellins	LOC115712094	XP_030496189.1	XM_030640329.1	X	NC_044370.1	53660896	53663023	-	cytochrome P450 714C2
None	NA	NA	Hormones	LOC115712114	XP_030496208.1	XM_030640348.1	4	NC_044373.1	64751426	64755835	+	gibberellin 20 oxidase 1-B
None	NA	NA	Flowering time integrator	LOC115712674	XP_030496860.1	XM_030641000.1	4	NC_044373.1	72417015	72420046	-	14-3-3 protein 1 isoform X1
None	NA	NA	Vernalization	LOC115712806	XP_030497039.1	XM_030641179.1	4	NC_044373.1	1778350	1779345	+	protein FLX-like 3
None	NA	NA	Circadian Clock Photoperiodism, light perception and signalling	LOC115713904	XP_030498244.1	XM_030642384.1	4	NC_044373.1	91340569	91341291	+	protein LATE FLOWERING
None	NA	NA	General	LOC115714584	XP_030499184.1	XM_030643324.1	4	NC_044373.1	50163251	50163869	-	protein DOWNSTREAM OF FLC
None	NA	NA	Flower development and meristem identity Flowering time integrator	LOC115714969	XP_030499595.1	XM_030643735.1	4	NC_044373.1	50196836	50199103	-	protein UPSTREAM OF FLC isoform X2
None	NA	NA	Gibberellins Hormones	LOC115715978	XP_030500516.1	XM_030644656.1	5	NC_044374.1	81823024	81827063	+	ent-kaurenoic acid oxidase 2
None	NA	NA	General	LOC115716317	XP_030500938.1	XM_030645078.1	5	NC_044374.1	61864989	61877801	-	flowering locus K homology domain isoform X1
None	NA	NA	Circadian Clock	LOC115716864	XP_030501628.1	XM_030645768.1	5	NC_044374.1	8101045	8104563	-	protein REVEILLE 6
None	NA	NA	Hormones	LOC115716895	XP_030501671.1	XM_030645811.1	5	NC_044374.1	36799970	36801273	-	gibberellin 20 oxidase 2-like
None	NA	NA	Hormones	LOC115718151	XP_030502971.1	XM_030647111.1	5	NC_044374.1	36948992	36950307	+	LOW QUALITY PROTEIN: gibberellin 20 oxidase 2-like
None	NA	NA	Gibberellins	LOC115718657	XP_030503342.1	XM_030647482.1	2	NC_044375.1	68251660	68253574	-	cytochrome P450 714C2
None	NA	NA	Flower development and meristem identity Flowering time integrator	LOC115719565	XP_030504521.1	XM_030648661.1	2	NC_044375.1	78737302	78739673	-	protein UPSTREAM OF FLC
None	NA	NA	General	LOC115720389	XP_030505400.1	XM_030649540.1	2	NC_044375.1	79978403	79978795	-	flowering-promoting factor 1-like protein 1
None	NA	NA	Gibberellins	LOC115720479	XP_030505488.1	XM_030649628.1	2	NC_044375.1	89970469	89977451	-	cytochrome P450 714C2
None	NA	NA	Hormones	LOC115720809	XP_030505845.1	XM_030649985.1	2	NC_044375.1	6644848	6646953	-	gibberellin 3-beta-dioxygenase 1
None	NA	NA	Circadian Clock	LOC115721003	XP_030506085.1	XM_030650225.1	2	NC_044375.1	4817367	4820535	+	protein REVEILLE 8 isoform X1
None	NA	NA	Hormones	LOC115722004	XP_030506980.1	XM_030651120.1	9	NC_044376.1	5216716	5218446	+	DELLA protein RGL1-like
None	NA	NA	Circadian Clock	LOC115722085	XP_030507066.1	XM_030651206.1	9	NC_044376.1	29596371	29597186	-	transcription factor TCP7
None	NA	NA	Photoperiodism, light perception and signalling	LOC115722387	XP_030507450.1	XM_030651590.1	9	NC_044376.1	709343	711543	+	transcription factor bHLH62
None	NA	NA	Circadian Clock Photoperiodism, light perception and signalling	LOC115722652	XP_030507774.1	XM_030651914.1	X	NC_044370.1	59278882	59281268	+	protein GIGANTEA
None	NA	NA	Circadian Clock	LOC115723040	XP_030508299.1	XM_030652439.1	9	NC_044376.1	31577097	31586591	+	uncharacterized protein LOC115723040 isoform X1
None	NA	NA	Hormones	LOC115723133	XP_030508422.1	XM_030652562.1	9	NC_044376.1	5214625	5216118	+	DELLA protein RGL1-like
None	NA	NA	Hormones	LOC115723500	XP_030508856.1	XM_030652996.1	9	NC_044376.1	5212480	5213841	+	DELLA protein RGL1
None	NA	NA	Hormones	LOC115724160	XP_030509484.1	XM_030653624.1	9	NC_044376.1	5209145	5212411	+	DELLA protein RGL1
None	NA	NA	Flowering time integrator	LOC115725269	XP_030510585.1	XM_030654725.1	6	NC_044377.1	69096500	69098294	+	14-3-3-like protein 16R
None	NA	NA	General	LOC115725531	XP_030510952.1	XM_030655092.1	X	NC_044370.1	84619813	84620909	-	uncharacterized protein LOC115725531
None	NA	NA	Photoperiodism, light perception and signalling	LOC115703878	XP_030486974.1	XM_030631114.1	1	NC_044371.1	20816258	20818673	-	protein FAR1-RELATED SEQUENCE 5-like		Autoflower candidate region
None	NA	NA	Photoperiodism, light perception and signalling	LOC115703890	XP_030486987.1	XM_030631127.1	1	NC_044371.1	22253112	22253711	+	protein FAR1-RELATED SEQUENCE 5-like		Autoflower candidate region
None	NA	NA	General	LOC115705415	XP_030488610.1	XM_030632750.1	1	NC_044371.1	39265983	39269404	+	casein kinase 1-like protein 1		Casein Kinase Early1 candidate	Toth
None	NA	NA	Flower development and meristem identity Hormones	LOC115708759	XP_030492623.1	XM_030636763.1	3	NC_044372.1	47792358	47795244	-	APETALA2-like protein 3 isoform X1		CsAP2-LIKE	Spitzer-Ramon et al., 2022

## Sheet: Summary Data
Flor-ID Keyword	Instances of keyword association with a gene
Aging	28
Ambient temperature	7
Circadian Clock	49
Flower development and meristem identity	40
Flowering time integrator	32
General	159
Gibberellins	19
Hormones	73
Photoperiodism, light perception and signalling	165
Response to cold	1
Sugar	9
Vernalization	40
