# Supplementary material for: Comparative genomics of flowering behavior in Cannabis sativa
Source: Front Plant Sci. 2023 Jul 27;14:1227898. doi: 10.3389/fpls.2023.1227898 (PMC10421669; doi:10.3389/fpls.2023.1227898)
Supplement: Supplementary Table 2 — PEBP and MADS proteins. [file Table_2.xlsx]

## Sheet: PEBPs
Protein	Accession
AtMFT	AT1G18100.1
CsMFT1	XP30495622.1
CsMFT2	XP30495670.1
SlMFT	XP4235817
CsMFT3	XP30491560.1
SlSP2G	AAO31791
CmAFT	AB839766
SlCEN1.1	XP4234370
SlCEN1.2	XP4228449
SlCEN1.3	XP4228452
CsBFT2/CsCEN3	XP30500472.1
CsBFT1/CsCEN2	XP30500175.1
CsBFT3/CsCEN1	XP30480848.1
AtBFT	AT5G62040.1
CsATC/CsCEN4	XP30505861.1
SlSP/TFL	AAC26161
AtATC	AT2G27550.1
CmTFL1	AB839767
AtTFL1	AT5G03840.1
CsTFL1	XP30492795.1
SlSP9D	AAO31795
SlSP5G	AAO31793
SlSP5G2	XP4250075
AtFT	AT1G65480.1
AtTSF	AT4G20370.1
SlSP3D/SFT	NP1308081
CmFTL3	AB679272
CmFTL1	AB679270
CmFTL2	AB679271
CsFT2	XP30493096.1
CsFT1	XP30484282.1
CsFT4	XP30479745.1
CsFT3	XP30480713.1

## Sheet: Cs_MADS_protein_seqs
>XP_030478465.1 MADS-box transcription factor 23-like [Cannabis sativa]
MTRRTLPLKLIPNERARRVTFSKRKSSLIKKAYKLSTLCDVKVCLIIKDSTNQPSNNPIATWPKDPHKVR
SLINDYKIAKTTQKPSSKRLQNLIDFLKERINKVNKEIEKLCQTQGKSKGIVLGNGSNQEKLNGDQLCEF
ASELDNKMKQLNLRMRHLLSSHNDIKLQMLLQQHQMTSSSSKAPLFDMNYHNNNGSFTSLLNSNDYVFDK
YYKGNGTNLF
>XP_030478466.1 floral homeotic protein DEFICIENS-like [Cannabis sativa]
MTRRTLLLKLIPNERARRVTFSKRKSGLIKKAYELSTLCDVKVCLIIKDSTNQPSNNPIATWPKDPHKVR
SLINDYKIAKTTQKPSSKRLQNLTDFLKERINKVNKEIEKLCQSKEKSKGIVLGNGSKQEKLNGDQLCEF
ASELDNKMKQLNLRMRHLLSSHNDIKLQMLLQQHQMTSSSSKAPLFGMNYHNNNGSFTSLLNSNDYVFDK
YYNGNGTNLFQEDQGGQHGQYYDLKINGSNNNNMLEFGGVGELQQNDENVMSQPLQPLMPSSVVDNTEWP
YNQADSNMRFGPM
>XP_030479035.1 agamous-like MADS-box protein AGL80 [Cannabis sativa]
MTRKKVKLAYINNDSSRKATYKKRKKGLIKKVSELSTLCGVDACAIIYNPYDTQPEVYPSPAGVHRIVKK
LKKMPEVEQSKKMMNQEVFLKQKIGKVSEQVKKLKKENRDKEMNRLLYGNLSGKMNLQGLTVTDLNDLTW
LIDQNLKDIKKRMEKIAKDTKSARMAAAAAAAMHPLMNGKVNVNVTASATAFVADNNGRSNNNNNPVNFG
GKDVIFPLGNNNNMNFN
>XP_030479522.1 agamous-like MADS-box protein AGL29 [Cannabis sativa]
MGRRKIEMVKVQDRSALQVTFSKRRNGLFKKANELATLCDVDIAIIVFSPGGKVYSYGKPNVTSIIDRFL
HEQEHGVSSTKKRRSTSRRKTKELEKLSEQVNNGDMELEKEKKKRKKRKYDENEEMKRLKEELEILKEEV
DDRKHVVEASSTLMMISNDTF
>XP_030480504.1 floral homeotic protein AGAMOUS [Cannabis sativa]
MAYNNNNNSNNNVNNSISMSMSMSVSSPGRKMGRGKIEIKRIENTTNRQVTFCKRRNGLLKKAYELSVLC
DAEVALIVFSSRGRLYEYANQSVKSTIDRYKKASSDTSNTGSVSEVNAQFYQQEAAKLRGQIESLQKGIR
ELLGECIDSAKPRDLKNLESKLERGISRIRSKKNELLFAEIEYMQKREIDLHNNNQLLRAKIAENERNQS
MSMNMNMNINMNMNVGTSSYGHHHELIHQNHNNNNDHNNNNNNNNDDEGAASVVVHQQPGNYFQVNALQP
NNNHYSRQDPTMALQLV
>XP_030480508.1 MADS-box transcription factor 23 isoform X1 [Cannabis sativa]
MGRGKIVIRRIDNSTSRQVTFSKRRNGLLKKAKELAILCDAEVGVMIFSSTGKLYDFSSTSMKTIIDRYN
KAKEDHHQPGNPTSEVKFWQREAAMLRQQLQSLQENHRQMMGEELSGLNVKELQNLENQLEMSLRGVRMK
KDQILMHEIQELNKKGNLIHQENIDLYKKVNLIRQENMELYEKVYGTRDVNEANRIPLLTEDLGMREESH
GLGMEQGMSMKQIDLQLSQPQQQNYEPPARTTKLGYDSSIKLYNES
>XP_030480518.1 MADS-box transcription factor 23 isoform X2 [Cannabis sativa]
MGRGKIVIRRIDNSTSRQVTFSKRRNGLLKKAKELAILCDAEVGVMIFSSTGKLYDFSSTSMKTIIDRYN
KAKEDHHQPGNPTSEVKFWQREAAMLRQQLQSLQENHRQMMGEELSGLNVKELQNLENQLEMSLRGVRMK
KDQILMHEIQELNKKGNLIHQENIDLYKKVNLIRQENMELYEKVYGTRDVNEANRIPLLTEDLGMREESH
GLGMEQGMSMKQIDLQLSQPQQQNYEPPARTTKLGLQLH
>XP_030480525.1 MADS-box transcription factor 23 isoform X3 [Cannabis sativa]
MGRGKIVIRRIDNSTSRQVTFSKRRNGLLKKAKELAILCDAEVGVMIFSSTGKLYDFSSTSMKTIIDRYN
KAKEDHHQPGNPTSEVKFWQREAAMLRQQLQSLQENHRQMMGEELSGLNVKELQNLENQLEMSLRGVRMK
KDQILMHEIQELNKKGNLIHQENIDLYKKVYGTRDVNEANRIPLLTEDLGMREESHGLGMEQGMSMKQID
LQLSQPQQQNYEPPARTTKLGYDSSIKLYNES
>XP_030480533.1 MADS-box transcription factor 27 isoform X4 [Cannabis sativa]
MGRGKIVIRRIDNSTSRQVTFSKRRNGLLKKAKELAILCDAEVGVMIFSSTGKLYDFSSTSMKTIIDRYN
KAKEDHHQPGNPTSEVKFWQREAAMLRQQLQSLQENHRQMMGEELSGLNVKELQNLENQLEMSLRGVRMK
KDQILMHEIQELNKKGNLIHQENIDLYKKVNLIRQENMELYEKVFI
>XP_030481490.1 truncated transcription factor CAULIFLOWER A isoform X1 [Cannabis sativa]
MGRGRVELKRIENKINRQVTFSKRRNGLLKKAHEISVLCDAEVAVIVFSHKGKLSEYSTDSCMEKILERY
ERYSYAERQLVSMDSETQLQIMQGNWTVEYSRLTAKIELLQRNRRHYLGEDLDSLTLKDLTGLEQQIDIS
LKQIRARRNQLMNETISDLQKREKAAREENNLLEKKIKERGKMVAVEQQQQQQEMQWEQQNHGPASTSSY
LLQQPLPCLNIGGGYEDGTQEIRRNDLDLTLEPLYSCHLGCFAA
>XP_030481705.1 agamous-like MADS-box protein MADS1 [Cannabis sativa]
MEFGSNNNNEEEGGESSSHRKMGRGKIEIKRIENTTNRQVTFCKRRNGLLKKAYELSVLCDAEVALIVFS
TRGRLYEYANNSVRATIDKYKKACSDSTNTGSVAEANVQFYQQESSKLRRQIRELQNSNRHILGEAISTM
TFKDLKSLEGRLERGISRIRSKKNEMLFAEIEFMQKREMELQNHNNYLRAKIAENERIQQQQNEEEEQQQ
QQQMNLMPTETTATTRPNNTDSNNNNNNNVDQSASQSYDHHNFLPVTLMDSNPHYSHSHRPDHTGFQLV
>XP_030482855.1 floral homeotic protein PMADS 2 isoform X1 [Cannabis sativa]
MGRGKIEIKKIENTSNRAVTYAKRKAGIFKKAKEIAILCDVKVSLIIVSGSGKMDAMCSPDNSLSTICEE
YHKHSKEKLWPAKHENLHNEIEMVKKENENMVIELRHLNGQDINLNHYELIPIEEALENGLISVRARKSE
LVNILRQNLEAKEEEHKRLICELHQKMEVVGDHGYHNHHHHHDQRLNLRDYNNAHMPLAFRVQPMQPNLQ
ERI
>XP_030482856.1 floral homeotic protein PMADS 2 isoform X2 [Cannabis sativa]
MGRGKIEIKKIENTSNRAVTYAKRKAGIFKKAKEIAILCDVKVSLIIVSGSGKMDAMCSPDNSLSTICEE
YHKHSKEKLWPAKHENLHNEIEMVKKENENMVIELRHLNGQDINLNHYELIPIEEALENGLISVRARKLE
AKEEEHKRLICELHQKMEVVGDHGYHNHHHHHDQRLNLRDYNNAHMPLAFRVQPMQPNLQERI
>XP_030483127.1 agamous-like MADS-box protein AGL12 [Cannabis sativa]
MARGKVQLRRIENPVHRQVTFCKRRAGLLKKAKELSVLCDAEIGLVIFSAHGKLYDLATKGTMQGLIEKY
MKSTKGSLVAQADQQQPILQTQSDQLDAKNEISMLKQEIEILQKGLRYMFGGGAGTMNLDELQILEKNLE
LWIYHIRSAKMDIMSQEIQLLKNKEGILKAANKYLQDKIEENTTTASDLDFVPMMTTNNPYPLTILQNGI
FQF
>XP_030483277.1 agamous-like MADS-box protein AGL82 [Cannabis sativa]
MARRKIRLAWIENKTARKASFRKRRAGLLKKMKELITLCGISAFIIINNPDELGPPIIWPSMEEARELYQ
RFRSVPDVERCKKMMNQEDYLRERSGKMEEQIRKYHKQNQENLTSHILAQIFGQGKPLTELMSNELDSVI
CVLENYLKEVKMRIHYYNLMVGNQSPGSSSNVPPPLIPDQSKGKEVSWESCFSGILVNNNINNVLLMNNV
EKQVPDHRQYFVGGTSHGSTFFSIAANNVVYPNYYGLGRNCSTTGFHIQPYMMNNQNLFGHAISNDQKDL
VNFSQQVNFEGSSITSSQPDTHLGQINLESGRVNYEHVEMEVQSGQGDIIMAENHNNGDNTGNVTSVNIV
DGKKP
>XP_030483297.1 agamous-like MADS-box protein AGL29 [Cannabis sativa]
MCKRKRSLEEEGEQQQQKPGQCSNVFVSFSKRRTGLFHKASELCVKFGAQIAIVILSPTDNPYAFGHTSV
DEVLQHYLHQTTIIPRCLTDEHKHQNQRIEGLKYSQKQERKLESMDEESKVVMGLKHWIENEVEADCKTS
TDVEELEFLKQKYLVLLDQINQRILGSVEKGKEEDIVSIDSNSFSTDEVFTSIDSTPFSTEEGYFDFDTT
HFSTEEEYFDFDTTHFEEEFGISLADLWS
>XP_030483617.1 floral homeotic protein AGAMOUS [Cannabis sativa]
MGRGKLPLELIPKVKARRMTFLKRRSCLIKKAYELSTLCNVKVCLIVYDSMNQSSDPIATWPENPHEIRS
LINDYKTAMAQKPDSKRLHTIADFIKEKIKKVNTEIEKLDQTSTTNTPSTSTTSFSNNQLVEFVSDLDNK
IEQVNERMRHLIHLNHYNNFGMQDPFMSSCSVQYCSPNDHQLPYYNDNEPQILLQQQHQMPWIYDQSSSS
SSSKAPLFTFNPSLSFDMSYHYNNCDPFDYAIDEYYNGNNLLLEDQANQHNNNIVLESERGVGAGLHQND
QNGMMLSHNPLMPMQHQNYNVSQTLLPLMPSSTVDTEWHYNQAIPLWDLSPHCDSLENLIMFD
>XP_030483748.1 MADS-box transcription factor 3-like [Cannabis sativa]
MGRGKLPLELIPKDNARRITFLKRKSCLIKKAYELSTLCDVKVCLIVNDVMNQSSDPIATWPRNPHEVKS
LINDYKTAMAQKPNSKRLHTITDFIKEKIKKVNTEIEKLDQTKTMTTSTTNTPSTSTTTPTNQEKAIVEE
SLIVELNGNNQLVEFVSDLDNKIEQVNERMRHLIHLNHYNNFGIQDPFMSSTSSSSVQYFHHNHQQLPYY
NDNNPQMLLQQQHQMPWIYSQPSSSSSSSSSKAHLFPFNPSLSFDMSYHYNNSDPFTRLLNSNDYAIDQY
YNGTNLLLEDQANQHNNNIVLESKRGGVGAGLHQNDQNGMMLSHNPLMPTQHQNYNVSQPPLPLMPSSTV
DTKLHYNQAIPLWDLSPHGDSLGNSINHV
>XP_030484019.1 MADS-box protein CMB1 isoform X1 [Cannabis sativa]
MGRGKVELKRIENKINRQVTFAKRRNGLLKKAYELSVLCDAEVALIIFSARGKLYEFCSGPSITKTLERY
DRCSYGAQEGKLAGNDTESIYQEYLKLKAKVEVLRRTQRNLLGEDLEHLGLKEIQQLEQKLDSSLKQIRS
TKTQHMIDELSLLRGKEETLLEENNELKKKLEKICGLIPEQESENGDQNVGCTHHPTQPVELSFEHLRCN
NNSGYNNINTNNTTSTIALQIGYGGTVNSGIRGQENMGAAHSMQNLMACNSVDRGCFDL
>XP_030484020.1 MADS-box protein CMB1 isoform X2 [Cannabis sativa]
MGRGKVELKRIENKINRQVTFAKRRNGLLKKAYELSVLCDAEVALIIFSARGKLYEFCSGPSITKTLERY
DRCSYGAQEGKLAGNDTESIYQEYLKLKAKVEVLRRTQRNLLGEDLEHLGLKEIQQLEQKLDSSLKQIRS
TKTQHMIDELSLLRGKEETLLEENNELKKKESENGDQNVGCTHHPTQPVELSFEHLRCNNNSGYNNINTN
NTTSTIALQIGYGGTVNSGIRGQENMGAAHSMQNLMACNSVDRGCFDL
>XP_030484132.1 floral homeotic protein PMADS 2-like [Cannabis sativa]
MGRGKIEIKKIENTSNRAVTYAKRKAGIFKKAKEIAILCDVKVSLIIVSGSGKMDAMCSPDNSLSTICEE
YHKHSKEKLWPAKHENLHNEIEMVKKENENMVIELRHLNGQDINLNHYELIPIEEALENGLISVRARKSE
LVNILRQNLEAKEEEHKRLICELHQKMEVVGDHGYHNHHHHHDQRLNLRDYNNAHMPLAFRVQPMQPNLQ
ERI
>XP_030484349.1 agamous-like MADS-box protein MADS2 isoform X1 [Cannabis sativa]
MGRGRVELKRIENKINRQVTFAKRRNGLLKKAYELSVLCDAEVALIIFSNRGKLYEFCSSPSSMVKTLER
YQKCSYGAVEVSCKPAKELESSYREYLKLKTRFESLERTQRNLLGEDLGPLNTKELEQIERQLESSLKQV
RSTKTQYMLDQLSDLQSREHNLIEANRALTIKLDEISSRNNFRQSWDVTEQDHHHHHQQQQAISYGHQHG
QPQGLIFQPLDCNPTLQIGYNAAVTEQMSNNNHGQQVNGFIPGWML
>XP_030484352.1 agamous-like MADS-box protein MADS2 isoform X1 [Cannabis sativa]
MGRGRVELKRIENKINRQVTFAKRRNGLLKKAYELSVLCDAEVALIIFSNRGKLYEFCSSPSSMVKTLER
YQKCSYGAVEVSKPAKELESSYREYLKLKSRFEYLQRTQRNLLGEDLGPLNTKELEQIERQLESSLKQVR
STKTQYMLDQLSDLQSREHNLIEANRALTVKLDEISSRNNFRQSWDISEHDHHHHQQQAISYGHQHGQSQ
GLIFQPLDCNPTLQIGYNAGVTEQMSNNTHGQQVNGFIPGWML
>XP_030484436.1 MADS-box protein FBP24 [Cannabis sativa]
MGRGKINISRIENKTTRQVTFAKRRAGLLKKTHELAVLCDAQIGLIIFSANGKLYEFCSDPLSMENIIQK
YQLATGTQIMEQNDIEQMHGEMRRIMSETRNLQLSLQRYIGEDLSSLSLGELNELEHVLEHSSHKIRTRK
FEILQQQMENLERKEQLLGQDNEHMFHLLKEQQAAATTYEEQNEVVNVRKIEEVERMGGMSHILDQFPFG
GEDQPSSVLQLTTLHQTTPNNFCPYRLLPTQPNLQDYTLN
>XP_030484710.1 truncated transcription factor CAULIFLOWER A isoform X1 [Cannabis sativa]
MGRGKVELKRIENKINRQVTFAKRRNGLLKKAYELSVLCDAEVALIIFSARGKLFEFCSGPSITKTLERY
ERCCYAEQESKLLSGKDIEWSLSYIQSTYQEYLKLKEKVEHLRRTQRNILGEDLEHLGLNEIQQLEQKLD
MSLKKIRSTKNEHMIDEFSHLRGQEEMLMEENNNLKNKLEEICGLFGKQGDDHGQHNVAYTHQSAEQVQL
NLEPLRHNNTTIALQIGSYDGTANSRMMSGRGENVGAAPSMKNLMAFNSVDHECFDL
>XP_030484711.1 MADS-box protein CMB1 isoform X2 [Cannabis sativa]
MGRGKVELKRIENKINRQVTFAKRRNGLLKKAYELSVLCDAEVALIIFSARGKLFEFCSGPSITKTLERY
ERCCYAEQESKLLSGKDIESTYQEYLKLKEKVEHLRRTQRNILGEDLEHLGLNEIQQLEQKLDMSLKKIR
STKNEHMIDEFSHLRGQEEMLMEENNNLKNKLEEICGLFGKQGDDHGQHNVAYTHQSAEQVQLNLEPLRH
NNTTIALQIGSYDGTANSRMMSGRGENVGAAPSMKNLMAFNSVDHECFDL
>XP_030484775.1 agamous-like MADS-box protein AGL29 [Cannabis sativa]
MGKRSLEEGEEQQQQKKQKQQKKPSNMLVSFSKRRDGLFKKASELCVKCGAQIAVVILSPAGIPHAFGHT
SVDEVLQHYLHQTTIIPRCLTDEHKHQNQRIEGLKYSRKQERKLESMDEESKVVMGLKHWIENEVEADCK
TSTDVEELEFLKQKYLVLLDQINQRILGYDSSTWSVESGIEVVNSSGCTPFSIEEVITSSSSTPFTTEEV
ITSSGNTPFSTEEEYFDFDFDTTSFEEEFGISLADLWS
>XP_030484795.1 agamous-like MADS-box protein AGL30 isoform X1 [Cannabis sativa]
MGRVKLKIKKLENTNGRQATYAKRKHGIMKKANELSILCDIDIILLMFSPTGKPSLCSGKRSSIEEVIAK
FAQLTPQERAKRKLESLEALKKTFKKLDHDVNIQEFLGTSSQTIEELSNQATLFQTQLSEIHKRLSYWTN
PDKIDSVEHLGQMENSLRESLNQIRSHKENLQKQQFMSLDCTSQFQNGLHIPFRVGADQQLQPLSWMPNN
DTQNIVLPDDPNLLSHRDMECSTSSSFGSYSGYFGMGRNPEISNSGQENGMVTDLSRTTPMRLQLNGGQF
PYAPYNLNVLSDQKFQPQTEMNPQENTVDYQVNGNFEVPRHGYETNHQNSWASTAGPYAVSMLDETLYPQ
HPN
>XP_030484797.1 agamous-like MADS-box protein AGL30 isoform X3 [Cannabis sativa]
MGRVKLKIKKLENTNGRQATYAKRKHGIMKKANELSILCDIDIILLMFSPTGKPSLCSGKRSSIEEVIAK
FAQLTPQERAKRKLESLETQLSEIHKRLSYWTNPDKIDSVEHLGQMENSLRESLNQIRSHKENLQKQQFM
SLDCTSQFQNGLHIPFRVGADQQLQPLSWMPNNDTQNIVLPDDPNLLSHRDMECSTSSSFGSYSGYFGMG
RNPEISNSGQENGMVTDLSRTTPMRLQLNGGQFPYAPYNLNVLSDQKFQPQTEMNPQENTVDYQVNGNFE
VPRHGYETNHQNSWASTAGPYAVSMLDETLYPQHPN
>XP_030484798.1 agamous-like MADS-box protein AGL30 isoform X4 [Cannabis sativa]
MGRVKLKIKKLENTNGRQATYAKRKHGIMKKANELSILCDIDIILLMFSPTGKPSLCSGKRSIEEVIAKF
AQLTPQERAKRKLESLETQLSEIHKRLSYWTNPDKIDSVEHLGQMENSLRESLNQIRSHKENLQKQQFMS
LDCTSQFQNGLHIPFRVGADQQLQPLSWMPNNDTQNIVLPDDPNLLSHRDMECSTSSSFGSYSGYFGMGR
NPEISNSGQENGMVTDLSRTTPMRLQLNGGQFPYAPYNLNVLSDQKFQPQTEMNPQENTVDYQVNGNFEV
PRHGYETNHQNSWASTAGPYAVSMLDETLYPQHPN
>XP_030485101.1 truncated transcription factor CAULIFLOWER A [Cannabis sativa]
MGRGRVEMKRIENKISRQVTFSKRRSGLLKKAHEISVLCDAHVALIVFSTKGKLFNFSSSSSMEEILERY
ESYSTNAQKHLQAAPTTLSESQDSSKWTFEFPKLMSRVEILQKNLRNCMGEDLALLSMRELQNIEQQIDI
GLKRVRTRKNQIMHETLSDLQKKAKAIQDRNNWITNQIKEDGKILVESRNLDQQANNSPNSSTLLLLAPP
PRPSSLPSLTIGETFQERVLTEENNERQSHEQPSSNNTTPMPPWMLPQMKFH
>XP_030485511.1 agamous-like MADS-box protein AGL80 [Cannabis sativa]
MTRKKVKLAYINNDASRKATYKKRKKGLLKKVSELSTLCGVDACAIIYSPYDTQPEVYPSPGGVHRIVKK
FKKMPEIEQGKKMMNQEVFLKQKIGKVSEQMKRLKKENRDRELNRLLYGNLSGKMNLQGLTVTDLNDLTS
LIDQNLKDINKRMEELAKETKTARMAAAAAAKVPPLMNREVNSTSATTSTAYNNNRGGGMQRRQDLNTQN
QANNNNAMKFGGRDAIFPLRNNNNMNLN
>XP_030485608.1 truncated transcription factor CAULIFLOWER A [Cannabis sativa]
MGRGRVEMKRIENKINRQVTFSKRRSGLLKKAHEISVLCDAEVALIVFSTKGKLSEYSTNSSMERILERY
ERYSYAERQLMSNDPEQTGSWTLEHAKLKARMEVLQRNQKHFMGEELDSLSMKELQNLEQQLDSALKHVR
SRKNQLMYESISDLQKKDKALQEQNNILTKKIKEKEKEKAQQALLEQQQINHEVESSSNIVLPQSMQTLD
IGVSSYSARGDDNNGDGEDEAREDQNRGNNNNNNSHLPSWMLSNHNA
>XP_030485988.1 agamous-like MADS-box protein AGL11 [Cannabis sativa]
MGRGKLPLKLIPKEKARRITFLKRRSGLIKKAYELSTLCDVKVCLIVKDLTNQPSNPIVTWPENPHKVKS
LINDYKNAMVKKPPSKRLHTMQDFVNERLEKVNSEIEKLSVVSQSQTSSSSKSKGIVIDNNESGNNLSMF
VLDNKIEELKQRMRHLIHLYDYNHNVQYYSPNDLTHHHHYFHHNHQMPWIYGQPSSQTVSFDVHNNNYGS
FTKLLNSDDYGIDDQYYNNTNLLLEDQGDQHNNNINVLESGEGVEGMHQNDQNEMMLFDNPLMPLQQQNY
NVSQPLLPLMPSSAAETTHEWHNYNQSDSTMGFFPTW
>XP_030486051.1 agamous-like MADS-box protein AGL11 [Cannabis sativa]
MGRGKLPLKLIPKEKARRITFLKRRSGLIKKAYELSTLCDVKVCLIVKDLINQPSNPIVTWPENPHKVKS
LINDYKNAMVKKPPSKRLHTMQDFVNERLEKVNSEIEKLSVVSQSQTSSSSKSKGIVIDNNESGNNLSMF
VLDNKIEELKQRMRHLIHLYDYNHNVQYYSPNDLTHHHHYFHHNHQMPWIYGQPSSQTVSFDVHNNNYGS
FTKLLNSDDYGIDDQYYNNTNLLLEDQGDEHNNNINVLESGEGVGGMHQNDQNEMMLFDNPLMPLQQQNY
NVSQPLLPLMPSSAAETTHEWHNYNQSDSTMGFFPTW
>XP_030487367.1 agamous-like MADS-box protein MADS3 [Cannabis sativa]
MGRGRVELKRIENKINRQVTFSKRRNGLLKKAYELSVLCDAEVALIVFSSRGKLYEFGSAGITKTLERYQ
RCSFTPHDNSSVERETQSWYHEITKLKTKYESLERTQRHLLGEDLGPLNVKELQNLEKQLEGSLAQVRQK
KMQIMIEQMEDLRKKERQLGDLNKQLKIKLDAEGQNLKAIQNQNIWNSNLASGSTSFALHTSSQSNITMD
CHHLSEPILQIGYHQYVPAEGTSHSIPKTMSGSETNFMQGWVL
>XP_030487368.1 MADS-box transcription factor 27 isoform X1 [Cannabis sativa]
MGRGKVELKRIENPTSRQVTFSKRRNGLLKKAFELSLLCDAEVGLIVFSPSGKLYQYASHDMESSIVRYK
SEMGLLGSADDQHSRAIELQFWRTRIEEMKRSTETLEANLRNLAGEDLSTLGMKELKQLERQLKIGVERV
RCKKRRILSEHINYLKRKRRELLEENKRLLRKVKLDQQIDAVN
>XP_030487612.1 agamous-like MADS-box protein AGL62 [Cannabis sativa]
MASIEETKTHDNNNNKRTTQGRQKIEIKKLEKKSNKQVTFSKRRSGLFKKAAELSVLCGSEVAVIVFSPN
GKLFTFGNPSVDNVVSSYLNNGAVVVPSSSSGNGNSTSNLVNAMIELEEAEKKKKQVVRQATLGSILENN
NNINAWLEKPVEEMGYEECDHQLAKLINLRNKISEASSSKDFDVPMTKTTPFCGLGLNF
>XP_030487613.1 agamous-like MADS-box protein AGL62 [Cannabis sativa]
MASIEETKPHNKRTSQGRRKIDIKKLEKKSNKQVTFSKRRSGLFKKAAELGILCGAEVAVIVFSPNNKLF
SFGNVDDVAGSYLNNGAVVPSSSSTSTLVKGMIELEEAEEKKRQLERQATLASILENNNINSWWEKPVEE
MGYEECDNHLATLINIRNKFSDASSSSTDFDVPKTKTMPFCGDWSLGLNF
>XP_030490578.1 MADS-box protein SOC1 [Cannabis sativa]
MVRGKTQMRRIENATSRQVTFSKRRNGLLKKAFELSVLCDAEVALIIFSPRGKLNEFASSSMQATIERYR
KHTKDNQTHNKSVEQTMQLQHLKQEATAMMKKIELLEISKRKFLGEGLGSCSLEELQQVEQQLEKSVTKI
RARKNQVFKDQIEILKEKEKALTSENARLSEKYGIKPMVQASNNNNNNNNNNNNNNNHKQIEDLNNTESN
PSSDVETELFIGLPETRLKRLLPKK
>XP_030490979.1 MADS-box protein FBP24-like isoform X1 [Cannabis sativa]
MGRGKIKISRIENKITRQVTFAKRRAGLLKKTHELAVLCDAQIGLIIFSANGKLYDFCSDPLSMQNIIQK
YQLTTGTRIVEQNDTEQLHGEMRRIISETQNLQMSLQRYTGEDLSSLTLGELNELEQVLVHASHNVRARK
FEILQQQMENLQRKKQLLEQDNEHIFHLIKEHQATAAAYEEQNQVHVTKIEEVERMGMNNNNINWNRNGN
VLDQFPFSGEVQPSSVLQLATLHDHHNLNPNRLLPTQPNLREYTLD
>XP_030490980.1 MADS-box protein FBP24-like isoform X2 [Cannabis sativa]
MGRGKIKISRIENKITRQVTFAKRRAGLLKKTHELAVLCDAQIGLIIFSANGKLYDFCSDPLSMQNIIQK
YQLTTGTRIVEQNDTEQLHGEMRRIISETQNLQMSLQRYTGEDLSSLTLGELNELEQVLVHASHNVRARK
FEILQQQMENLQRKIKEHQATAAAYEEQNQVHVTKIEEVERMGMNNNNINWNRNGNVLDQFPFSGEVQPS
SVLQLATLHDHHNLNPNRLLPTQPNLREYTLD
>XP_030492818.1 agamous-like MADS-box protein AGL16 [Cannabis sativa]
MGRGKVEVKRIENPTSRQVTFSKRRNGLLKKAFELSLLCDAELALIIFSSSGKLYQYASHDMDRSIVRYR
SEMGLLGSTHNQRSTTIEFWKTEIEEMKRSTETLEGNLRNLAGEDLSNLGMKELRQLERQLKIGVERVRC
KKRRIVSEHINFLKRRRRALVEENTRLQKKVKLLDQQQEA
>XP_030492901.1 agamous-like MADS-box protein MADS2 isoform X1 [Cannabis sativa]
MGRGRVELKRIENKINRQVTFAKRRNGLLKKAYELSVLCEAEVAVIIFSNRGKLYEFCSGSSSMVKTVEK
YKKYSYGGLDATQPLIDSHENSYQEYLKLKARVEVLQKSQRNLLGEDLGPLNTKELEQLENQLEISLRHI
RSTKTQCLLDQLNDLQHREQFLLEANKTLRRKLEENSTQNPLRLGWEAAAEEHNNNAYTHLPSQTDQGFY
QPLGNNCTLQTGYSNSMGPTEMNGGAPAQTLNGYMHGWML
>XP_030492903.1 agamous-like MADS-box protein MADS2 isoform X3 [Cannabis sativa]
MGRGRVELKRIENKINRQVTFAKRRNGLLKKAYELSVLCEAEVAVIIFSNRGKLYEFCSGSSSMVKTVEK
YKKYSYGGLDATQPLIDSHENSYQEYLKLKARVEVLQKSQRNLLGEDLGPLNTKELEQLENQLEISLRHI
RSTKEQFLLEANKTLRRKLEENSTQNPLRLGWEAAAEEHNNNAYTHLPSQTDQGFYQPLGNNCTLQTGYS
NSMGPTEMNGGAPAQTLNGYMHGWML
>XP_030492926.1 agamous-like MADS-box protein AGL16 [Cannabis sativa]
MGRGKVEVKRIENPTSRQVTFSKRRNGLLKKAFELSLLCDAELALIIFSSSGKLYQYASHDMDRSIVRYR
SEMGLLGSTHNQRSTTIEFWKTEIEEMKRSTETLEGNLRNLAGEDLSNLGMKELRQLERQLKIGVERVRC
KKRRIVSEHINFLKRRRRALVEENTRLQKKVKLLDQQQEA
>XP_030493305.1 agamous-like MADS-box protein AGL65 isoform X1 [Cannabis sativa]
MGRLKLKIQRLESISNRQVTYSKRRNGILKKAKELSILCDIDIALLMFSPSGKPTLYQGERSNFEEVITK
FSQLTCQERAKRKLESLEALKKTFKKLDHDVNIPDFMGSSSQTIEDSMSQVRVLQAQLTGLQRRLSFWSN
PDQINDVENIIQMEDILRESINKIQIYRESFRKHQLLPLNCTGQLQNEMYSPLMVGNAQEAQSLSWIPNN
ENQPLMVPGNFLPHGGIQCTTDFSLPGCSSYNSNGSGKQMEVGNRGQLNNMEQGGCSLNDLSGTAGLNLD
FGEHYAYPSFEASLLDNKKLKINMEMNLQTTSVDYQVNNNCVLPTSIYDNAQHDWISAFGPCGLALCNEN
SCQQRN
>XP_030493307.1 agamous-like MADS-box protein AGL65 isoform X2 [Cannabis sativa]
MGRLKLKIQRLESISNRQVTYSKRRNGILKKAKELSILCDIDIALLMFSPSGKPTLYQGERSNFEEVITK
FSQLTCQERAKRKLESLEALKKTFKKLDHDVNIPDFMGSSSQTIEDSMSQVRVLQAQLTGLQRRLSFWSN
PDQINDVENIIQMEDILRESINKIQIYRLQNEMYSPLMVGNAQEAQSLSWIPNNENQPLMVPGNFLPHGG
IQCTTDFSLPGCSSYNSNGSGKQMEVGNRGQLNNMEQGGCSLNDLSGTAGLNLDFGEHYAYPSFEASLLD
NKKLKINMEMNLQTTSVDYQVNNNCVLPTSIYDNAQHDWISAFGPCGLALCNENSCQQRN
>XP_030494537.1 agamous-like MADS-box protein AGL15 [Cannabis sativa]
MGRGKIEIKRIENANSRQVTFSKRRAGLLKKAQELAILCDAEVAVIIFSNTGKLFEYSSSGMKRTLARYN
KCVDYPEGAIVDKTEKQDSKEVDDLKDEIAKLQRKQSRLLGEDLSGMSSKELQHLEHQLNDGLISVKERK
EKLLKEQLEQSRLQEQRAVLENETLRRQIEELRCLFPRADCTVPSYLEYYPIEKKNSSANHSDIGPDQNS
NFAAEKGDSDTTLHLGLASDVYRKRKSPEQEMHSTDSGSNMGLL
>XP_030495246.1 agamous-like MADS-box protein AGL66 isoform X1 [Cannabis sativa]
MGRVKLQIKRIENTTNRQVTFSKRRNGLIKKAYELSVLCDVDLALVMFSPSGRLSFFSSRNKSIEEILGR
YVNNLPQNDQGRQHNQEFLKRAISQIRNEGDQHNNRTITSRTSSDSQLEEIQQVILCFRLQLKEMENRLR
IYEGDPSEITTLLEAEYWEQILQETLKNVCLRKVDLLPKTANVEEELIPMTTDSTPQNILDHCWLPRRDQ
QMQMLNFFHENGHLSLRNESQRARVIEMAPSRSYQE
>XP_030495253.1 agamous-like MADS-box protein AGL66 isoform X2 [Cannabis sativa]
MGRVKLQIKRIENTTNRQVTFSKRRNGLIKKAYELSVLCDVDLALVMFSPSGRLSFFSSRNKSIEEILGR
YVNNLPQNDQGRQHNQEFLKRAISQIRNEGDQHNNRTITSRTSSDSQLEEIQQVILCFRLQLKEMENRLR
IYEGDPSEITTLLEAEYWEQILQETLKNVCLRKVDLLPKTANVEEELIPMTTDSTPQNILDHCWLPRRDQ
QMQMLNFFHENGHLSLRSES
>XP_030495327.1 agamous-like MADS-box protein AGL80 [Cannabis sativa]
MTRKKVNLEYITDDSSRKTTFRKRKNGMLKQVVELSTLCDVDVCAIVYGPNGGEPEVFPSTEKAHCVLTR
FKCMPEIERSKNMLNQEKYLRNKIEKVKEQVRKLKRDNREKELIQIMYANLVGNTNLQGLSVMDLNDLTR
LIDQSIGEINKKIDKIANTMSTQMSETTTSSPIITPDLIENLVGDRNTTILDVVATNFDNNGGNNLALSL
>XP_030495329.1 agamous-like MADS-box protein AGL80 [Cannabis sativa]
MTRKKVKLAYINNDAARKATYKKRKTGLIKKVSELSTLCGVDVCAIIYSPFNTQPEVYPSLPGVQCIVEK
FKKMPEIEQSKKMMNQEVFLKQKIGKVSEQMKKMKKENRDEEMNRLLYGNLSGKMNLQGLTVTDLNDLTS
LIDQNLMDINKRMEKIAKETKIARMTTDAAATPNGKVKANVATFATTSTTDNNGRGRGMQRRGDSNTRNQ
ANSNNNNKSMKFGGRDVIFPLRNNNNNMNFN
>XP_030495333.1 agamous-like MADS-box protein AGL80 [Cannabis sativa]
MTRKKVNLEYITDDSSRKTTFRKRKNGMLKQVVELSTLCDVDVCAIVYGPNGGEPEVFPSTEKAHSVLTR
FKCMPEIERSKNMLNQEKYLRNKIEKVKEQVRKLKRDNREKELIQIMYANLVGNTNLQGLSVMDLNDLTR
LIDQSIGEINKKIDEIANTMSTQMSETTTSSPIITPDLIENLVGDRNTTILDVVATNFDNNGGNNLALSL
>XP_030495336.1 agamous-like MADS-box protein AGL80 [Cannabis sativa]
MTRKKVKLAYINNDAARKATYKKRKTGLIKKVSELSTLCGVDVCAIIYSPFNTQPEVYPSLPGLQCIVEK
FKKMPEIEQSKKMMNQEVFLKQKIGKVSEQMKKMKKENRDEEMNRLLYGNLSGKMNLQGLTVTDLNDLTS
LIDQNLMDINKRMEKIAKETKIARMTTDAAATPNGKVKANVATFATTSTTDNNGRGRGMQRRGDSNTRNQ
ANSNNNNKSMKFGGRDVIFPLRNNNNNMNFN
>XP_030495699.1 uncharacterized protein LOC115711495 isoform X1 [Cannabis sativa]
MEKNDKVFLERKTTLKRKARMLTDLCNSKVCLVIYDSKGNLDVWPEDSTNAHSIINNYYTKLESMKRKNN
EVCLSNVLEKKLRKLEEKVSCTITTTSTLNGDSSLSLNWDEKLAVLSKNSLMDMAQCLKAKIKVLDEKID
MVKGKDQAILQTLIQNNHDHQFEDDYFNSLPPLLTLPPPPPMPQTYVPLNYEEIQEIYDRSKIPFGQCYE
INNDLVHSSKQLHYSDFGYYNGDHLQACLQFPVPSSAATYTSNNFWQPSGI
>XP_030495701.1 uncharacterized protein LOC115711495 isoform X3 [Cannabis sativa]
MEKNDKVFLERKTTLKRKARMLTDLCNSKVCLVIYDSKGNLDVWPEDSTNAHSIINNYYTKLESMKRKNN
EVCLSNVLEKKLRKLEEKVSCTITTTSTLNGDSSLSLNWDEKLAVLSKNSLMDMAQCLKAKIKVLDEKID
MVKGKDQAILQTLIQNNHDHQFEDDYFNSLPPLLTLPPPPPMPQTYVPLNYEEIQEIYDRSKIPFGQCYE
INNDLQLHYSDFGYYNGDHLQACLQFPVPSSAATYTSNNFWQPSGI
>XP_030495702.1 uncharacterized protein LOC115711495 isoform X4 [Cannabis sativa]
MEKNDKVFLERKTTLKRKARMLTDLCNSKVCLVIYDSKGNLDVWPEDSTNAHSIINNYYTKLESMKRKNN
EVCLSNVLEKKLRKLEEKVSCTITTTSTLNGDSSLSLNWDEKLAVLSKNSLMDMAQCLKAKIKVLDEKID
MVKGKDQAILQTLIQNNHDHQFEDDYFNSLPPLLTLPPPPPMPQTYVPLNYEEIQEIYDRSKIPFGQCYE
INNDLLHYSDFGYYNGDHLQACLQFPVPSSAATYTSNNFWQPSGI
>XP_030496177.1 agamous-like MADS-box protein MADS4 [Cannabis sativa]
MGRGRVELKRIENKINRQVTFAKRRNGLLKKAYELSVLCDAEVALIIFSNRGKLYEFCSSSSMLKTLERY
QKNNYGAPEPNVSAREALELSSQQEYLKLKARYDTLLRNHRNLMGEELGNLSSKELESLERQLDTSLKQI
RSTRTQCMLDQLTDLQRKEHFLNETNKNLKQKLVEGYQLSSLQLNPSADEYGRQSHQQQAHHDVFYHPLD
CEPTLQIGYQADTISVVTAGPSVNNYLPAGWLP
>XP_030496683.1 MADS-box transcription factor 23 isoform X1 [Cannabis sativa]
MGRGKIVIRRIDNSTSRQVTFSKRRKGLIKKAKELAILCDAEVGLVIFSSTGKLYEFANTSCMKSIIERY
NKAKEEHQQLLNPTSEIKFWQREVAILRQQLQNLQETYRQLMGKELCGLSVKELQNLENQLELSLKGIRM
KKEQMLTDEIQELSRKGNLIHQENVDLYKKINHFSQQNTELQNKVYGARDITTTTATTSENNFTIVSYNL
DMNGEQSNNIPVHLQLSQPSQHT
>XP_030496684.1 MADS-box transcription factor 23 isoform X2 [Cannabis sativa]
MGRGKIVIRRIDNSTSRQVTFSKRRKGLIKKAKELAILCDAEVGLVIFSSTGKLYEFANTSCMKSIIERY
NKAKEEHQQLLNPTSEIKFWQREVAILRQQLQNLQETYRQLMGKELCGLSVKELQNLENQLELSLKGIRM
KKEQMLTDEIQELSRKVYGARDITTTTATTSENNFTIVSYNLDMNGEQSNNIPVHLQLSQPSQHT
>XP_030496685.1 agamous-like MADS-box protein AGL21 isoform X3 [Cannabis sativa]
MGRGKIVIRRIDNSTSRQVTFSKRRKGLIKKAKELAILCDAEVGLVIFSSTGKLYEFANTSCMKSIIERY
NKAKEEHQQLLNPTSEIKFWQREVAILRQQLQNLQETYRQLMGKELCGLSVKELQNLENQLELSLKGIRM
KKEQMLTDEIQELSRKSQVRSLSGCFIYDRVTLFIRKMLIYIRR
>XP_030497815.1 agamous-like MADS-box protein AGL104 [Cannabis sativa]
MGRVKLQIKRIENNTNRQVTFSKRRNGLIKKAYELSILCDIDIALIMFSPSGRLSHFSGKRRIEDVLSRY
INMPDHDRGGVVRNKEFLLGTLKTLKMESDIALQIANPTAVNSNLEELQLETRNLQHQVQMVEQQLRIFE
PDALSITSIEELESCENNLLDTLSRVTERKKDLLSNHFSTFDPSSVQVYFEAQEGVPTSFENEVGNWLPN
DSLQNPNQICVGSESSYVHPTPRPESSSIYEIPVPHGTNLNVDTCNVGGCPMGNETSEGLTSWHHNYTTT
ELLSALMSPSSLIPSPINKHGIATGLPPMMSQHPVETAPSCPQMQTTGVEEPNYENNPVGTTID
>XP_030498217.1 agamous-like MADS-box protein AGL62 [Cannabis sativa]
MMASIDDQKMKTNNKRSQGRQKIQIKKLENKSNKHVTFSKRRSGLFKKAGELSLLCGSKVAVIVFSPTGK
LFCFGHPSVDDVVRSYLDYNNQTVVVLPGSNDNITATTTTSTSTFVKAMTELEEAEKKKKQLVRQARLAS
ILDNNSCAWWEEPVEDMTYEELENHLAMLTNLRNKISVSAGGTNKAPAASDLDLPMTMSFCGNWSSGLNV
>XP_030498852.1 MADS-box protein JOINTLESS [Cannabis sativa]
MAREKIQIKKIDNATARQVTFSKRRKGLVKKAEELSVLCDADVGLIIFSSTGKLFEYSNTSMKEIIDRHH
LHSTNLEKLEQPSLKLQLVENNTYSKLCKEISEKSHHLRQLRGEELHGLNIEELQRLEKSLEVGLSRVIE
KKGEKIMKEINELQMKGKQLMEENERLRQQVVEICNGRTREGGTTTNTDSEYVITTEEGQSSESVTNVCS
SNGPPQDYDSTSDTSLKLGLPYAG
>XP_030499268.1 agamous-like MADS-box protein TM6 [Cannabis sativa]
MMSGYKSEPNNNIDQDTHHQYHYHHHHNHHRDHEEEEEEDDHHDENSSNKQQKIGRGKTQIKFIENQTNR
QVTFSKRRNGIFKKAGELSVLCDAKVSLIIVPNNNKLHEFITPGANTKEMIDLYQRTKGVDLWKSQYEAM
QQTLRQLKAKNFELRTQIRQRLGYDLNDLSFHELSDLENSMLSSVEAIRHRKNHKIKTQAETTKKRNKSW
EERNSVLMHEIHARCEDPPYGLVEDNVEGGGGGGYESSAVALANGASNLYAFRHHHNGGGSLITTSHSAL
HSGTGGGGSGGAYESFDLRDLRLA
>XP_030500067.1 agamous-like MADS-box protein AGL65 [Cannabis sativa]
MEMINNINNSNNNIIPPIRRVCRGRQKVPMRRIENESNLQVTFSKRRYGIFKKASELCTLCGVELAIIVF
SPGNNVFSFGHPNVRLIIDRYMNPENYSRMTAQANLSGTFQLIEAHRNADIRVMNQHLNLLTDQWDVVRK
QNFELKQDYNRHWWEFPIESFYDMSRLEQLKLAMEMLRGDTTKLADWILIQSTPTRANSLLLPPPFNNMN
KGGLLQLPSFASLFPNQEARPHNNNNNNDDDEEIGFVGGMPIGSTCTDIPQLQQAITSDSNRMSNMPQMQ
LEITSSDGTVNNHEDLNLQSLMQDLTSSDSFVNHANQPPPHTQVNASDHSTLSNVNQQLFSPEIQNIMQA
STNYNNNMSTMPHMMQQPNNSSTSSTFNNHFNMSPMPNHTMQQRDNSSASATHMPPHHHHTMQPNTTTNS
STPGASADKHFNMTTMPSHGHHMQQPNTTTSASAINVNHQLQLPMLHETLSPSSQLLLQQPNDSQETDQL
FDYNVGYDHEFF
>XP_030500068.1 agamous-like MADS-box protein AGL90 [Cannabis sativa]
MEMNNSNENIVNNDNRNTQSRRINRGRRRVSMTRMTNESNLQVTFSKRRSGLFKKASELCTLCGVQIAII
VFSPGNKVYSFGHSSVNVVIDRYMNPEHYAMLMASQANSGTFQLIEAHRNATLRELNQQLTHITEQMESL
KKRAKELKGIPCNFRDALNLLDGPVRNNVHEMSQLGNLKNAMEMLRNVTTEQSAVNTNMNMMNTLSSFYG
AGDGEGSVGGGRGLPQLPSSPAPVPVPAPASAFAASSSSNFPNQGGAVTNMLQQQQPQQQLPTFDNYHYY
NHNNNVNTSPAVVTDIPDLQAIMNFGVGHDNVNHVNMGHNNMQGMMMTTPGGGSTVNHLLSHHNQMQHQQ
QLPAAMASLPLRSPLELPLQLQQPNPHQQYQGNSSTYGDHLFNNNPNNDDTNAGYDHPFF
>XP_030500965.1 agamous-like MADS-box protein MADS3 [Cannabis sativa]
MGRGKVVLERIENKINRQVSFSKRRNGLLKKAYELHVLCDAEVGLIIFSSRGKLYEFGSSDLNTIVERYR
QSTYALQNNNVEGEEPQNLILEIPKLKAKYESLQRTERHFHGENLEELGLKELQNLEKRLDRTLSQARQH
KWQMLLDRLEEIRQNDHSLRETNEQLKSKLEEGRNKGRSNKNQGNDIDPHAENDYDTTYNPDSIQPNNHN
LIYTTKGRIIDTFPN
>XP_030501771.1 agamous-like MADS-box protein AGL19 isoform X1 [Cannabis sativa]
MVRGKTQMKRIENAASRQVTFSKRRNGLLKKAFELSVLCDAEVALIIFSPRGKLYEFASSRCFSINKTIE
RYTQRRTKDGGSCLTSNKTISEDDHHDLQAAVSKEDSFSMAKKIDHLEVSKMKLLGDGLESCSFQELHQI
ENQLERSLAKIRARKNQLYREQIEKLKQEEKTLLEHNAKLRQQVQCGMLQKVSSGSEEKEDQVLVVVNNN
NNAHDHHRHNMDVETELFIGLPERRK
>XP_030501772.1 agamous-like MADS-box protein AGL19 isoform X2 [Cannabis sativa]
MVRGKTQMKRIENAASRQVTFSKRRNGLLKKAFELSVLCDAEVALIIFSPRGKLYEFASSSINKTIERYT
QRRTKDGGSCLTSNKTISEDDHHDLQAAVSKEDSFSMAKKIDHLEVSKMKLLGDGLESCSFQELHQIENQ
LERSLAKIRARKNQLYREQIEKLKQEEKTLLEHNAKLRQQVQCGMLQKVSSGSEEKEDQVLVVVNNNNNA
HDHHRHNMDVETELFIGLPERRK
>XP_030502139.1 MADS-box protein AGL42 [Cannabis sativa]
MVRGKIQMKRIENATSRQVTFSKRRSGLLKKAQELAVLCDVQLGLIIFSQKGRLYEFSTTDMQNIIERYH
KHAKIQEQTNKMEVEQHTQRLKLETADMAKKIELLEVSKRKFLGQDISSCSHEELLNIEHRLEQSLRSIR
ARKEQLFQEQIEKLKAKERLLLQENMQLREKNTSGENLLRESMFREKEVVRYWSKSSNSTNTEVETGLFI
GLPEIRC
>XP_030503101.1 agamous-like MADS-box protein AGL80 [Cannabis sativa]
MTRKKVNMQYITDDSSRKNTFRKRKNGILKKVEELSTLCGVDACAIIYDPNSGEPTVFPSTEKAHHVVTN
FLAMSKIDQTKKMFNQEEYLRNRIETAKEQVRKLKRDNREKELIQIMYSNLEGNTNLQDLSVEDLNDLTR
LIDQSIEEINKRIGEININIKPSQMPETTATTTPLTTPIIAENLVGDRNATVVDVVATNFDNNSRNNISL
S
>XP_030503137.1 agamous-like MADS-box protein AGL80 [Cannabis sativa]
MTRKKVKLAYINNDASRKATYKKRKKGLIKKVSELSTLCGVDVCAIIYSPYNTQPEVYPSPRGVHRIVKN
FKTMPEIEQSKKMMNQEVFLKQKIGKVSEQMKRLKKENRDKELNRLLYGNLSGKMNLQGLTVTDLNDLTS
LIDLNLKDINKRMEEIAKETKNARTAASAAAKVPPLMNREVTAAFATTSTVYKNDRARDATFLEDDYIKD
FKLKSKVVLEEMLSGITPSDVPSFSTQVVDNPTPSVEITERTTIKVPV
>XP_030503216.1 agamous-like MADS-box protein AGL80 [Cannabis sativa]
MTRKKVKLAYINNDASRKATYKKRKKGLIKKVSELSTLCGVDACAIIYSPYNTQPEVYPSPGGVHRIVKK
FKKMPEIEQSKKMMNQEVFLKQKIGKVSEQMKRLKKENRDRELNRLLYGNLSGKMNLQGLTVKDLNDLTS
LIDQNLKDINKRMEEIAKKTKIARMTAATAAKVPPFINGEVNAASATTMAYDNDRGRGIRRDLNAQN
>XP_030503511.1 MADS-box transcription factor 23 [Cannabis sativa]
MGRGKIVIRRIDNSTSRQVTFSKRRNGLLKKAKELSILCDAQVGLIIFSSTGKLYDYSSSSMKSVIERYN
KMKEEHHQLLNPISEVKFWQREAATLRQQLQYLQECHRQLMGEELSGLSTKDLQNLENQLEMSLKGIRTK
KDQILTDEIRELNKKGNLIHQENIELYKKVDLLQKENMELQIKAYGASDMINDINRSCSTTMGYSSVVSN
KYDHAQQPTIHLQLSQPQQQLHSESQSNNLQPSHHDHNNKTTPPKPMILGLKLQ
>XP_030505120.1 MADS-box transcription factor 23-like [Cannabis sativa]
MKRQFRIEKIDDKQRRLVSFSKRKSGLFNKAKQLSHLTGAEIAVIILSETGRPYVQAFPTPSSFESLIAP
FVSSSPSTSTAEATHEMTSSMSTETGTSTQGEDVFNINDSLRYLLEFDVENCNDLKELEALKKKLEETRK
RTAVALDLSVAEYLLSD
>XP_030505122.1 MADS-box transcription factor 23-like [Cannabis sativa]
MKRKIAIEKIEDKQRRLVSFSKRKSGLFNKAKQLSHLTGAQIAVIILSETGRPYVQASPTPSSFESLIAP
FVSSSPSTSTTEATHEMTSSTTETETSTTQGEDVFSLNDSLRYLLEFDVENCNDLKELEALKKKLEETRK
RTAVALDLSVAEYLLSD
>XP_030505617.1 MADS-box protein AGL24 isoform X1 [Cannabis sativa]
MTRQKIEIKKIENITARQVTFSKRRRGLFKKALELSTLCDAEIALIVFSTTGKLYHYATSSMPQVIERHK
SHSDENRLHNKLSQPSDMLENERKRYALLKKELEKKTMELRHVMGENLQELSLEELKKLEKSVHISLSRV
NEIKDQTNLKEITFLQKGIELLEDNQRVQQKSNVVKVGDALEKCLIDSTSTNSHIFNQPQTQSQNQNHFD
SSDTTLKLGLPFPNCSYN
>XP_030505619.1 MADS-box protein JOINTLESS isoform X3 [Cannabis sativa]
MTRQKIEIKKIENITARQVTFSKRRRGLFKKALELSTLCDAEIALIVFSTTGKLYHYATSSMPQVIERHK
SHSDENRLHNKLSQPSDMLENERKRYALLKKELEKKTMELRHVMGENLQELSLEELKKLEKSVHISLSRV
NEIKDQTNLKEITFLQKGIELLEDNQRVQQVTISQLQL
>XP_030505853.1 MADS-box transcription factor ANR1-like [Cannabis sativa]
MGRGKIVIRRIDNSTSRQVTFSKRRNGLLKKAKELSILCDAQVGLIIFSSTGKLYDYSSSSMKCVIERYN
KMKEEHNQLLNPASEVKFWQREASTLRNQLQYLQECHRHLMGEELSNLSATDLQNLENQLEMSLKSIRAK
KVCTL
>XP_030506124.1 agamous-like MADS-box protein AGL80 [Cannabis sativa]
MTRKKVKLAYINNDSSRKATYKKRKKGLMKKVSELSTLCGVDACAIIYSPYDTQPEVYPSPAGVHRIVTK
FKKMPEIEQSKKMVNQETFLKQKISKVSEQVKKLKKENRDKEMNRLLYGNLSGKMNLQGLTVTDLNDLTW
LIDQNLKDINKRMEKIAKDTKSARMAAAAAAAAIVPPLMNGEVKVNVATNSAANNINGHSGAIQRQQWRG
DSNPQNQANINNNNNPMRFGGRDVIFPLGNNNKNNWVNDHFT
>XP_030506400.1 MADS-box protein SVP isoform X1 [Cannabis sativa]
MTRQKIEIKKIDNITARQVTFSKRRRGLFKKAQELSTLCDAQLALIVFSSTGKLYEYSSSSMQQVIKRHS
LQSDYPEKSRQPSFDELQKKRHALLTREIAEKTMEIRHLKGEKLENLSLEELKRLEKMIETGLERVIETK
DNKFIHEIDSLKRKGVLLSEENKHLQQQMAGTSGVVPIIDVEILEQGESCESITAISNPEDLDSSDTTLK
LGLPFPESS
>XP_030506402.1 MADS-box protein SVP isoform X3 [Cannabis sativa]
MTRQKIEIKKIDNITARQVTFSKRRRGLFKKAQELSTLCDAQLALIVFSSTGKLYEYSSSSMQQVIKRHS
LQSDYPEKSRQPSFDELQRHALLTREIAEKTMEIRHLKGEKLENLSLEELKRLEKMIETGLERVIETKDN
KFIHEIDSLKRKGVLLSEENKHLQQQMAGTSGVVPIIDVEILEQGESCESITAISNPEDLDSSDTTLKLG
LPFPESS
>XP_030508977.1 agamous-like MADS-box protein AGL11 [Cannabis sativa]
MTLPLKLIPNEKARRVTFSKRKSSLIKKAYELSTLCDVKVCLIIKDSTNQPSNNPIATWPKDPHKVRSLI
NDYKIAKTTQKPSSKSLQNLTDFLKERINKVNKEIEKLCQSQEKSKGIVVGNGSNQEKLNGNQLCKFASE
LDNKMKQLNLRMRHLISSHNFKLQMLLQQHQMISSSSKAPLFGMNYHNITSLLNSNDYVFDKYYNGNGTN
LFQEDQRDQHGQYYDLKINGSNNNNMLEFGGVGELQQNDENVMS
>XP_030508993.1 agamous-like MADS-box protein AGL92 [Cannabis sativa]
MTLPLKLIPNEKARRVTFSKRKSSLIKKAYELSTLCDVKVCLIIKDSTNQPSNNPIATWPKDPHKVRSLI
NDYKIAKTTQKPSSKSLQNLTDFLKERINKVNKEIEKLCQSQEKSKGIVVGNGSNQEKLNGNQLCKFASE
LDNKMKQLNLRMRHLISSHNFKLQMLLQQHQMISSSSKAPLFGMNYHNITSLLNSNDYVFDKYYNGNGTN
LFKKINVINMVNIMI
>XP_030510457.1 truncated transcription factor CAULIFLOWER A [Cannabis sativa]
MGRGKVEMKLIENKQSRQVTFAKRRSGLMKKAHELSVLCDVEIGLIVFSGNGRLYEFCSGHSLGNTIERY
KTKGKEEKSSNELENCDYDGLWEDVDLLKGVSNLDVEHLTVDELAHKERQLEALLRLTRQRKAQLMMETV
STLSDQEKQLREEKQLLENKIEEMVGERGKKVEANEVKGNAPNSMRRVLQLY

## Sheet: At_MADS_protein_seqs
>AT1G01530_AGL28_Ma_translation
MARKNLGRRKIELVKMTNESNLQVTFSKRRSGLFKKGSELCTLCDAEIAIIVFSPSGKAYSFGHPNVNKL
LDHSLGRVIRHNNTNFAESRTKLRIQMLNESLTEVMAEKEKEQETKQSIVQNERENKDAEKWWRNSPTEL
NLAQSTSMKCDLEALKKEVDEKVAQLHHRNLNFYVGSSSNVAAPAAVSGGNISTNHGFFDQNGNSTSAPT
LPFGFNVMNRTPAGYNSYQLQNQEVKQVHPQYWARYY
>AT1G17310_AGL100_translation
MKDLFMEGERETSSMTCLTPKDSVQSPNMLVRQPKKETTTQTPKTTRGRQKIEIKKIEEETKRQVTFSKR
RRGLFKKSAELSVLTGAKIAVITFSKCDRIYRFGHVDALIDKYLRKSPVKLEGYSGDNAADEESRRPWWE
RPVESVPEEELEEYMAALSMLRENIGKKIVAMGNDRTVDMVPAWPINVMGWKPTMDMQKLENLTDGVNRC
RVGQNGD
>AT1G18750_AGL65_MIKCS_translation
MGRVKLKIKRLESTSNRQVTYTKRKNGILKKAKELSILCDIDIVLLMFSPTGRATAFHGEHSCIEEVISK
FAQLTPQERTKRKLESLEALKKTFKKLDHDVNIHDFLGARNQTIEGLSNQVAIYQAQLMECHRRLSCWTN
IDRIENTEHLDLLEESLRKSIERIQIHKEHYRKNQLLPIECATTQFHSGIQLPMAMGGNSSMQEAHSMSW
LPDNDHQQTILPGDSSFLPHREMDGSIPVYSSCFFESTKPEDQICSNPGQQFEQLEQQGNGCLGLQQLGE
EYSYPTPFGTTLGMEEDQEKKIKSEMELNNLQQQQQQQQQQQQQDPSMYDPMANNNGGCFQIPHDQSMFV
NDHHHHHHHHHQNWVPDSMFGQTSYNQVCVFTPPLELSR
>AT1G22130_AGL104_MIKCS_translation
MGRVKLEIKRIENTTNRQVTFSKRRNGLIKKAYELSILCDIDIALIMFSPSDRLSLFSGKTRIEDVFSRF
INLPKQERESALYFPDQNRRPDIQNKECLLRILQQLKTENDIALQVTNPAAINSDVEELEHEVCRLQQQL
QMAEEELRRYEPDPIRFTTMEEYEVSEKQLLDTLTHVVQRRDHLMSNHLSSYEASTMQPNIGGPFVNDVV
EGWLPENGTNQTHLFDASAHSNQLRELSSAMYEPLLQGSSSSSNQNNMSECHVTNHNGEMFPEWAQAYSS
SALFASMQQQHEGVGPSIEEMMPAQQSDIPGVTAETQVDHEVSDYETKVPQLSSQ
>AT1G22590_AGL87_Mg_translation
MGRRKVTHQLISDNATRRVTFRKRKDGLLKKIYELTVLCGLPACAIIYSEYKDGPELWPNLNEVRSILNR
LSELPVEKQTKYMMDQKDLMNKMIQDAEKKLEKEKMHTRAMKLGLMAGSNDLITDTDCSEELARAADVVD
KKLKAIRERIKAVEAGAPIIKRD
>AT1G24260_SEP3_AGL2_translation
MGRGRVELKRIENKINRQVTFAKRRNGLLKKAYELSVLCDAEVALIIFSNRGKLYEFCSSSSMLRTLERY
QKCNYGAPEPNVPSREALAVELSSQQEYLKLKERYDALQRTQRNLLGEDLGPLSTKELESLERQLDSSLK
QIRALRTQFMLDQLNDLQSKERMLTETNKTLRLRLADGYQMPLQLNPNQEEVDHYGRHHHQQQQHSQAFF
QPLECEPILQIGYQGQQDGMGAGPSVNNYMLGWLPYDTNSI
>AT1G26310_CAL_SQUA_translation
MGRGRVELKRIENKINRQVTFSKRRTGLLKKAQEISVLCDAEVSLIVFSHKGKLFEYSSESCMEKVLERY
ERYSYAERQLIAPDSHVNAQTNWSMEYSRLKAKIELLERNQRHYLGEELEPMSLKDLQNLEQQLETALKH
IRSRKNQLMNESLNHLQRKEKEIQEENSMLTKQIKERENILRTKQTQCEQLNRSVDDVPQPQPFQHPHLY
MIAHQTSPFLNMGGLYQEEDQTAMRRNNLDLTLEPIYNYLGCYAA
>AT1G28450_AGL58_Ma_translation
MNPKKTKGKQKINIKKIEKDEDRSVTLSKRLNAIYTMIIELSILCGVEVAFIGYSCSGKPYTFGSPSFQA
VVERFLNGEASSSSSSSLQRSVKNAHKQAKIQELCKRYNRLVEELKVDEVKVKKAAALAETRAVNKDAWW
KADPNDVKDHEKAKKMMEKYQELKEKLREEVALRIKRGHDENNNK
>AT1G28460_AGL59_Ma_translation
MNPKKTKGKQKINIKKIEKDEGRSVTFSKRLNGIYTKISELSILCGVEVAFIGYSCSGKPYTFGSPSFQA
VAERFLNGDASSSSSSSLVMNAHKQAKIQELCKKYNRLVEELKVDEVKVKKAAALAETRVVNKDVWWKVD
PNDVKDHEKAKKMMEKYQELYDKLCEQAASRIKRGHDENNNK
>AT1G29962_AGL64_translation
MKPKKTKGKQRINIKKIEKDEDRLVTLSKRRNGIYTKLSELSILCGAEVAFLGYSCSGKPYTFGSPSFQA
VAERFLNGEASSSSSSSLQRSVMNAHQQAKIQELCKVYNRLVEEITVEEVKLKKTAALAEMMPMNEDAWW
KVDPNDVKDREEVKKMMEKHQELYEKLCEEAASRIKRGHDENNNK
>AT1G31140_GOA_Bsister_translation
MRKGKRVIKKIEEKIKRQVTFAKRKKSLIKKAYELSVLCDVHLGLIIFSHSNRLYDFCSNSTSMENLIMR
YQKEKEGQTTAEHSFHSCSDCVKTKESMMREIENLKLNLQLYDGHGLNLLTYDELLSFELHLESSLQHAR
ARKSEFMHQQQQQQTDQKLKGKEKGQGSSWEQLMWQAERQMMTCQRQKDPAPANEGGVPFLRWGTTHRRS
SPP
>AT1G31630_AGL86_Mg_translation
MRSKIKLSLIANKTSRRTTFRKRKGGITNKLHELTTLCGVKACAVISSPYENPVVWPSTEGVQEAVSMFM
ERPATEQSKLMMSHETYLQDKITKETKKLESLRRENRESQLRQFMFDCVEGKMSEHQYGARDLQDLSLYI
DHYINQLNSSVMLLTNNGASSSSFPPPLHTSVAGAGAGAGAAPLVVAGAGAAPLAVAGAGASPLAVAGVG
AAPLAVAGAGPPMAQNQYEPIQPYIPTAFSDNIQYQAPVDFNHQIQHGIYDNLSLDPNHQYPFQDDPFME
MLMEYPYEQVGYAAEHAHIPFMNGNYYNYHQPPTVGLTTTGHMPSNNATTTTTTNTTVV
>AT1G31640_AGL92_Mg_translation
MRTKTKLVLIPDRHFRRATFRKRNAGIRKKLHELTTLCDIKACAVIYSPFENPTVWPSTEGVQEVISEFM
EKPATERSKTMMSHETFLRDQITKEQNKLESLRRENRETQLKHFMFDCVGGKMSEQQYGARDLQDLSLFT
DQYLNQLNARKKFLTEYGESSSSVPPLFDVAGANPPVVADQAAVTVPPLFAVAGANLPVVADQAAVTVPP
LFAVAGANLPVVADQAAVNVPTGFHNMNVNQNQYEPVQPYVPTGFSDHIQYQNMNFNQNQQEPVHYQALA
VAGAGLPMTQNQYEPVHYQSLAVAGGGLPMSQLQYEPVQPYIPTVFSDNVQYQHMNLYQNQQEPVHYQAL
GVAGAGLPMNQNQYEPVQPYVPTGFSDHFQFENMNLNQNQQEPVQYQAPVDFNHQIQQGNYDMNLNQNMK
HAHIPFMDGNYYNYHQPPTVGLTSTGHMPSTTTTTTNNNNNNNV
>AT1G46408_AGL97_Ma_translation
MGGVKRKIAIEKIQNKNPRAVSFSKRRKGLYSKASELCLLSDAEIAIIATPVSSNSNAAFYSFGHSSVDN
VVAAFLANQRPCDERFWWEDESLLKSENLEELREAMDSMSTMLRDLKELEKQRDHQTQTLIHQPCSARVC
IQDYVTVNFDGFNTEEQTLAVSDNSNNNGLLGNLDECNEDFDDLDQIFDTVTNSEFLSVNLEMDDVTVNS
EGNTEEQTLAVSDNSNNNGLLGNLDECNEDFDDLDQIIEYLTSSEALSMNLKMDDV
>AT1G47760_AGL102_Ma_translation
MGRRKIEIKFIEDSIERKATFSRRRNGIFKKADELAKLCNVEIAVLVISPTNIPYTYGYPCFNDVVERIQ
NPSASSKLRSLMKELEQIKEFQEDLRKKQQRNLEKSNMKENVDLKLEDLVAFKAKLEAYQAGLKRKHVEM
EDLSSPSILSKNTKNKMMRTEYSSGQSKGMYEFRAFGPGFLGTI
>AT1G48150_AGL74_Ma_translation
MQSSNVTDCTMRKRGTKRKIEIEKRMTKQQRSVACSKRRPTLFSKAADLCLLSGANIAVFVTSPDENSDV
VYSFSGYSHASEIVDCYLNNKSPPKTTINPESAKFWWEEPDLYRDCDDLSELRIIEDRLMRTKKHLMDYL
EKKEKSHSVSKSDQNPNNDSGSSSSSSQIASDFGQNPSTLSPSSLKIVSFDQNSYSSLEPSSQVTTCFDQ
NPVFSVGSESSSDQSRYLVNEDSGFVDGLLCETEEENNGMRLPQETQTQPMFTEEDQSFWENLDVDDVFG
LFKDDNNLEVPLQDHSSTNEDDELLIDISEYLSEEAMECPCFS
>AT1G54760_AGL85_Ma_translation
MKTDWSHYLSVEMESTISNELSILCGAEVAFLGYSCSGKPYTFGSPSFQAVAERFLNREASSSLQRSVMN
AHQQAKIQELCKVYNRMVEEAKTEEAKVKKAAALAETMPVDEDAWWKVDPKEVEDHEEAKKIMEKCEGLY
EKLCNEAAARIQRGDAENNNK
>AT1G59810_AGL50_Mb_translation
MAPRQKKPNKSDDDDDLRRKKQSFFKQRFPGFKKKASELSVLCGNSVGFICYGPDSDLHVWPQSQDHNPQ
ALHEIVAKFNALSDERRKNHACDLNDFPHHLKGLSREELRKHLLHLDSQLLGVREQKIEILKKTLTGSSE
KDGARVSENSAISDHKLKIEPHLKDILSEDHLIRVSDKKLGSCDVFDELAYVVRGSRNLNENVSKYESKD
ADNTGLDHLVTLGGDYLQEAAAELYQTYNLGNFCDDHVWDLEFASRLPLLHTFSDPLMTTNTCQTMSTDM
ISI
>AT1G60040_AGL49_Mb_translation
MAPRQKKPNKSDDDDGDLHRKKQSFFKQRFPGFKKKASELSVLCGNSVGFICYGPDNDLHVWPQSQDHNP
QALHEIVAKFNALSDERRKNHACDLNDFPHHLKGLSREELRKHLLHLDSQLLGVREQKIEILKKTLTGSS
EKDGARVSENSAISDHKLKIEPNLTDILSEDHLIRVSDKKLGSCDVFDELAYVVRGSRNLNENVSNYESK
DAAYTGMDHLGTFGGNYLQEAAAELYQTYNLGNFCDDHVWDLEFASRLPPLHTFSDPLMTTNTCQTMSSD
MISI
>AT1G60880_AGL56_Ma_translation
MGGKKTKIEIKKIINKPAKTVAFTKRREGLFRKASQLCLLSPATQIAILAAPMTSKSHASFYSFGHSSVD
NVVSSLLYDHPPLTANQDNRSGLGFWWEDKRFDVSENVEELKEAVDAVSRMLNNVRCRLNDAVKSTQRDG
GLEILHHQEEEVLQTRNDETKTNQTHEFEGGETSGSASWLENEDDILHFDDDFYTGIDPLF
>AT1G60920_agl55_Ma_translation
MGGTKRKIEMKRIEDKNVRAVAFTKRKSGLFHKASELCLLSPGTQIAILATPLSSHSHASFYSFGHSSVD
HVVSSLLHNQHPSLPTNQDNRSGLGFWWEDQAFDRLENVDELKEAVDAVSRMLNNVRLRLDDAVKSNQRD
GSLVIHQEDEEVLQLGYKDTNQITKLEGETSASASLLKNVVDNLHIDDRYY
>AT1G65300_AGL38_Mg_translation
MKRKMKLSLIENSVSRKTTFTKRKKGMTKKLTELVTLCGVEACAVVYSPFNSIPEAWPSREGVEDVVSKF
MELSVLDRTKKMVDQETFISQRIAKEKEQLQKLRDENHNSQIRELMFGCLKGETNVYNLDGRDLQDLSLY
IDKYLNGLTRRIEILIENGESSSSLPLPIVANAAAPVGFDGPMFQYHNQNQQKPVQFQYQALYDFYDQIP
KKIHGFNMNMNKDSNQSMVLDLNQNLNDGEDEGIPCMDNNNYHPEIDCLATVTTAPTDVCAPNITNDL
>AT1G65330_AGL37_Mg_translation
MRGKMKLSFIENDSVRKTTFTKRKKGMLKKFNELVTLCGVDACAVIRSPYNSIQEPWPSREGVEEVMSKF
MEFSVLDRTKKMVDQETFLRQRIAKETERLQKLRDENRNSQIRDLMFGCLKGEVDVSHLHGRDLLDLNVF
LNKYLNGVIRRVEILKENGESSSSVPPPIGVAPTVVDASVPIGFDGRMIQDQNQNQQEPVQFQYQALYDF
YDQIPKKLHDFNMKMNIDPNQSMNLDLNDGEDEGIPCMDNNNYHPEIDCLATVTTAPTDVCAPNIINDL
>AT1G65360_AGL23_Ma_translation
MVKKTLGRRKVEIVKMTKESNLQVTFSKRKAGLFKKASEFCTLCDAKIAMIVFSPAGKVFSFGHPNVDVL
LDHFRGCVVGHNNTNLDESYTKLHVQMLNKSYTEVKAEVEKEQKNKQSRAQNERENENAEEWWSKSPLEL
NLSQSTCMIRVLKDLKKIVDEKAIQLIHQTNPNFYVGSSSNAAAPATVSGGNISTNQGFFDQNGMTTNPT
QTLLFGFDIMNRTPGV
>AT1G69120_AP1_SQUA_translation
MGRGRVQLKRIENKINRQVTFSKRRAGLLKKAHEISVLCDAEVALVVFSHKGKLFEYSTDSCMEKILERY
ERYSYAERQLIAPESDVNTNWSMEYNRLKAKIELLERNQRHYLGEDLQAMSPKELQNLEQQLDTALKHIR
TRKNQLMYESINELQKKEKAIQEQNSMLSKQIKEREKILRAQQEQWDQQNQGHNMPPPLPPQQHQIQHPY
MLSHQPSPFLNMGGLYQEDDPMAMRRNDLELTLEPVYNCNLGCFAA
>AT1G69540_AGL94_MIKCS_translation
MGRVKLKIKKLQNMNGRQCTYTKRRHGIMKKAKELSILCDIDVVLLMFSPMGKASICIGKHSIGEVIAKF
AQLSPQERAKRKLENLEALRKTFMKANHDIDISKFLDRISTPTVEVLSEKIRFLQTQLSDIHTRLSYWTD
VDNIDSVDVLQQLEHSLRQSLAQIYGRKASMPQRQQQQLMSSQCKNQLQTEIDIDFGMEMEQQLENFSWV
RTDENMNVPIEEEDPNLQLHHMYKDITCSASSALGNYSGLFSKSSDILQKLETGSIPGTSADPNQQFSNL
SFLNDQKLKQLAEWNLLGSPADYYVSQILEASYKPQIGGKNNGASSETLPYVAVFDDPLYFWPN
>AT1G71692_AGL12_translation
MARGKIQLKRIENPVHRQVTFCKRRTGLLKKAKELSVLCDAEIGVVIFSPQGKLFELATKGTMEGMIDKY
MKCTGGGRGSSSATFTAQEQLQPPNLDPKDEINVLKQEIEMLQKGISYMFGGGDGAMNLEELLLLEKHLE
YWISQIRSAKMDVMLQEIQSLRNKEGVLKNTNKYLLEKIEENNNSILDANFAVMETNYSYPLTMPSEIFQ
F
>AT1G72350_AGL60_Ma_translation
MEDGEASTITFLPTTEPKPLQNPNLLAKPKKETKQKKPKTTKGRQKIEIKEIMLETRRQVTFSKRRSGLF
KKAAELSVLCGAQIGIITFSRCDRIYSFGNVNSLIDKYLRKAPVMLRSHPGGNVANGEEDNDGLMWWERA
VESVPEEHMEEYKNALSVLRENLLTRIYQMSGDRTVENLPAFPNEMAMADWKLTNENLMARNDRGYGGNN
GDLEFAFMPQNGRQ
>AT1G77080_MAF1_FLM_AGL27_FLC_translation
MGRRKIEIKRIENKSSRQVTFSKRRNGLIDKARQLSILCESSVAVVVVSASGKLYDSSSGDDISKIIDRY
EIQHADELRALDLEEKIQNYLPHKELLETVQSKLEEPNVDNVSVDSLISLEEQLETALSVSRARKAELMM
EYIESLKEKEKLLREENQVLASQMGKNTLLATDDERGMFPGSSSGNKIPETLPLLN
>AT1G77950_AGL67_MIKCS_translation
MGRVKLELKRIEKSTNRQITFSKRKKGLIKKAYELSTLCDIDLALLMFSPSDRLCLFSGQTRIEDVLARY
INLPDQERENAIVFPDQSKRQGIQNKEYLLRTLEKLKIEDDMALQINEPRPEATNSNVEELEQEVCRLQQ
QLQISEEELRKFEPDPMRLTSMEEIEACEANLINTLTRVVQRREHLLRKSCEAQSNQQSMDGILLNDIVE
DWGPEPEPKQAHMIANSAHHSNQPSYDLLLRRSNSSSNQNPK
>AT1G77980_AGL66_MIKCS_translation
MGRVKLEIKRIENTTNRQVTFSKRRNGLIKKAYELSILCDIDIALLMFSPSDRLSLFSGKTRIEDVFSRY
INLSDQERENALVFPDQSRRPDFQSKEYLLRTLQQLKAENDIALQLTNPTAINSDVEELEHEVYKLQQQL
LMAEEELRKYEPDPIRFTTMEEYETCEKQLMDTLTRVNQRREHILSQDQLSSYEASALQQQQSMGGPFGN
DVVGGWLTENGPNEAHLFDASAHSAMYETLLQGSSSSSNQNNIMGESNVSNHNGDMFQEWAQAYNSTTAH
NPSTLFPPMQHQHGLVVDPNIEEIEIPVMKKDAQADHEVSDYDIRMPQLSSQ
>AT2G03060_AGL30_MIKCS_translation
MGRVKLKIKKLENTNGRQSTFAKRKNGILKKANELSILCDIDIVLLMFSPTGKAAICCGTRSSMEEVIAK
FSQVTPQERTKRKFESLENLKKTFQKLDHDVNIREFIASSNSTVEDLSTQARILQARISEIHGRLSYWTE
PDKINNVEHLGQLEISIRQSLDQLRAHKEHFGQQQQAMQIENANFVKDWSTCSMQDGIQIPLEQQLQSMS
WILNSNTTNIVTEEHNSIPQREVECSASSSFGSYPGYFGTGKSPEMTIPGQETSFLDELNTGQLKQDTSS
QQQFTNNNNITAYNPNLHNDMNHHQTLPPPPLPLTLPHAQVYIPMNQREYHMNGFFEAPPPDSSAYNDNT
NQTRFGSSSSSLPCSISMFDEYLFSQVTKTKLSQRF
>AT2G03710_SEP4_AGL3_AGL2_translation
MGRGKVELKRIENKINRQVTFAKRRNGLLKKAYELSVLCDAEIALLIFSNRGKLYEFCSSPSGMARTVDK
YRKHSYATMDPNQSAKDLQDKYQDYLKLKSRVEILQHSQRHLLGEELSEMDVNELEHLERQVDASLRQIR
STKARSMLDQLSDLKTKEEMLLETNRDLRRKLEDSDAALTQSFWGSSAAEQQQQHQQQQQGMSSYQSNPP
IQEAGFFKPLQGNVALQMSSHYNHNPANATNSATTSQNVNGFFPGWMV
>AT2G14210_ANR1_AGL44_AGL17_translation
MGRGKIVIRRIDNSTSRQVTFSKRRSGLLKKAKELSILCDAEVGVIIFSSTGKLYDYASNSSMKTIIERY
NRVKEEQHQLLNHASEIKFWQREVASLQQQLQYLQECHRKLVGEELSGMNANDLQNLEDQLVTSLKGVRL
KKDQLMTNEIRELNRKGQIIQKENHELQNIVDIMRKENIKLQKKVHGRTNAIEGNSSVDPISNGTTTYAP
PQLQLIQLQPAPREKSIRLGLQLS
>AT2G15660_AGL95_translation
MGREQQVKSKKIEENKGMVNEKGRRTNYIILCAVKACIIMFSPHEVEPMVWPSFEKARDLLDGFFALPDI
KKKKKQMSLEMYLKEKTKKVHEQFMKTQRKHMDHVTDQLMVELHRGRRLDDLDLSEINALISFSRENIIL
LRKELEFVQHSPLGDPRVPPFEAQFEELTTIANDVFVRGGQVDERAWKNYEATKRVSIGNALRGNQSHYL
VDKWLFASPKPREPTNQSRLTYQTIFYTKEAVATDALIWI
>AT2G22540_SVP_AGL22_StMADS11_translation
MAREKIQIRKIDNATARQVTFSKRRRGLFKKAEELSVLCDADVALIIFSSTGKLFEFCSSSMKEVLERHN
LQSKNLEKLDQPSLELQLVENSDHARMSKEIADKSHRLRQMRGEELQGLDIEELQQLEKALETGLTRVIE
TKSDKIMSEISELQKKGMQLMDENKRLRQQGTQLTEENERLGMQICNNVHAHGGAESENAAVYEEGQSSE
SITNAGNSTGAPVDSESSDTSLRLGLPYGG
>AT2G22630_AGL17_translation
MGRGKIVIQKIDDSTSRQVTFSKRRKGLIKKAKELAILCDAEVCLIIFSNTDKLYDFASSSVKSTIERFN
TAKMEEQELMNPASEVKFWQREAETLRQELHSLQENYRQLTGVELNGLSVKELQNIESQLEMSLRGIRMK
REQILTNEIKELTRKRNLVHHENLELSRKVQRIHQENVELYKKAYGTSNTNGLGHHELVDAVYESHAQVR
LQLSQPEQSHYKTSSNS
>AT2G24840_AGL61_DIA_Ma_translation
MYVTKYKNKLPTLQVDLIIMPHQTQACIYKQTLSLHQIFQQRKATKTLHTKKTMMSKKKESIGRQKIPMV
KIKKESHRQVTFSKRRAGLFKKASELCTLCGAEIGIIVFSPAKKPFSFGHPSVESVLDRYVSRNNMSLAQ
SQQLQGSPAASCELNMQLTHILSEVEEEKKKGQAMEEMRKESVRRSMINWWEKPVEEMNMVQLQEMKYAL
EELRKTVVTNMASFNEAKDDVFGFLDNKVTVPPYVNMPSGPSNIYNFANGNGCF
>AT2G26320_AGL33_MIKCS_translation
MKRTIKNKNKQIVKENMGRKKLKLKRIESLKERSSKFSKRKKGLFKKAEEVALLCDSDIMLIVVSPTEKP
TVFNTRSRSFHTILERFCMLSLQEREERCDLSYFYIIIT
>AT2G28700_AGL46_Mg_translation
MARKKLNLTYIFNDRMRKRSFKQRREGFLKKLNDLKVLCDVNACAVVYNPFNSNPDVWPSKSEVNNIIKK
FEMLPETQKKVKSVNHEEFLNLYISKVEKQSKKLIVENKETCLKEVMFKCLGGNMGDFVMNDNDRLDLCK
FIDHYLRNLYHHKNVTLNNPNFEIGESSSLMDMAPTATTGNMATTVVDEGMTPLLIAEGSSSSFLNSPLF
NSPQLTNELQLIVSQNHRLENSLASNLFFSEGQDICIPDMNQSIIPSNQGAEHVDFLESNFLPNNNQEVY
IPVMDQDEVYNPNQNHYENQQGFIDEMMKYAEKTSFPWMVENHCYNHNQ
>AT2G34440_AGL29_Ma_translation
MGRRKIKMEMVQDMNTRQVTFSKRRTGLFKKASELATLCNAELGIVVFSPGGKPFSYGKPNLDSVAERFM
REYDDSDSGDEEKSGNYRPKLKRLSERLDLLNQEVEAEKERGEKSQEKLESAGDERFKESIETLTLDELN
EYKDRLQTVHGRIEGQVNHLQASSCLMLLSRK
>AT2G40210_AGL48_Mg_translation
MTRKKVKLVWIENDKSRATSLQKMRVGLLKKVKELTILCAVRAIVIIFSPDKVGPLVWPSPQATHGLLDE
FFALPKSVQKKKESNVESYLKEKTHKFQEQLKKSKKKNKEHVIDELMMQLQSGREIADLNQSEMYALLSF
SRDTILLCRKKLAFMQFPPLRDPPVFPFEIQVEEFKTTTNDGFVGGGQDNKRAGRTDEATRFINTDIFKQ
SKSYYFFDEWVFPPSPPKYEIPQQMENGNPNPKSYRLYQGSSSNGNPHLEMDPFRLQMMTSQGLAGSVSQ
PLQHHSMINNPTMAMNQPSQDPFDYMRSELGINEGININNSQFYMSNNTITANDGVRQEPYPNVTTAGEN
NGDATTSNTNMVWPGFNNHHF
>AT2G42830_SHP2_AGL5_AG_translation
MEGGASNEVAESSKKIGRGKIEIKRIENTTNRQVTFCKRRNGLLKKAYELSVLCDAEVALVIFSTRGRLY
EYANNSVRGTIERYKKACSDAVNPPTITEANTQYYQQEASKLRRQIRDIQNLNRHILGESLGSLNFKELK
NLESRLEKGISRVRSKKHEMLVAEIEYMQKRVKEIELQNDNMYLRSKITERTGLQQQESSVIHQGTVYES
GVTSSHQSGQYNRNYIAVNLLEPNQNSSNQDQPPLQLV
>AT2G45650_AGL6_translation
MGRGRVEMKRIENKINRQVTFSKRRNGLLKKAYELSVLCDAEVALIIFSSRGKLYEFGSVGIESTIERYN
RCYNCSLSNNKPEETTQSWCQEVTKLKSKYESLVRTNRNLLGEDLGEMGVKELQALERQLEAALTATRQR
KTQVMMEEMEDLRKKERQLGDINKQLKIKFETEGHAFKTFQDLWANSAASVAGDPNNSEFPVEPSHPNVL
DCNTEPFLQIGFQQHYYVQGEGSSVSKSNVAGETNFVQGWVL
>AT2G45660_AGL20_SOC1_TM3_translation
MVRGKTQMKRIENATSRQVTFSKRRNGLLKKAFELSVLCDAEVSLIIFSPKGKLYEFASSNMQDTIDRYL
RHTKDRVSTKPVSEENMQHLKYEAANMMKKIEQLEASKRKLLGEGIGTCSIEELQQIEQQLEKSVKCIRA
RKTQVFKEQIEQLKQKEKALAAENEKLSEKWGSHESEVWSNKNQESTGRGDEESSPSSEVETQLFIGLPC
SSRK
>AT3G02310_SEP2_AGL4_AGL2_translation
MGRGRVELKRIENKINRQVTFAKRRNGLLKKAYELSVLCDAEVSLIVFSNRGKLYEFCSTSNMLKTLERY
QKCSYGSIEVNNKPAKELENSYREYLKLKGRYENLQRQQRNLLGEDLGPLNSKELEQLERQLDGSLKQVR
CIKTQYMLDQLSDLQGKEHILLDANRALSMKLEDMIGVRHHHIGGGWEGGDQQNIAYGHPQAHSQGLYQS
LECDPTLQIGYSHPVCSEQMAVTVQGQSQQGNGYIPGWML
>AT3G04100_AGL57_Ma_translation
MSSTKQAKGRKTKGKQKIEMKKVENYGDRMITFSKRKTGIFKKMNELVAMCDVEVAFLIFSQPKKPYTFA
HPSMKKVADRLKNPSRQEPLERDDTRPLVEAYKKRRLHDLVKKMEALEEELAMDLEKLKLLKESRNEKKL
DKMWWNFPSEGLSAKELQQRYQAMLELRDNLCDNMAHLRLGKDCGGSSSVRVGRRVSGGVRLFDREA
>AT3G05860_AGL45_Mg_translation
MTRKKLNLSYITNESMRKATFNKRKKGLVKKIHELSVLCGIEACAVIYSPFNSNPEVWPSNSEVKNVMEN
FEMLTKLEQEKKMVSHEGFIRQNISKTMESNNKKMIDNAERTMKEAMFQLLSGKGEKLNLTDRNREDLCK
YIDQYLKELYHHKNKTINQSHIEPGESSGATNAMTPTSVVEPIISSIQRPNQNPNFNHLSHNQYQYQQQF
GYPILVQDGIYNPSQIQNQHEEWLDDHMMNHSKEISHPLMDDNNFYYQQP
>AT3G18650_agl103_Mb_translation
MASSSSSSLSFSTSKKNKTFFKKPNSAFSSSRATSLIKRQQTVFKKAKELSILCDIDVCVICYGSNGELK
TWPEEREKVKAIARRYGELSETKRRKGSVDLHEFLEKMNKDDPEKEEKKKIKVRRVPKVKYPVWDPRFDN
YSVEQLMGLVQSLERNLTRIQHRTCAVVEAQGQRRVQYTNMANQELMMANTMNQLQQHSNQVSMYLWNHG
NGAFSQIPVSALASNQTQSLAPIPPELMIYPNSDAGNYSGSLGVQGTGINGLQNMNMLTYNNINSVNDFS
KQFDQNSRAESYSSLLGVHEDGNNEFENPNMSSRNNFNVQDCAGLLGMQGAGTNGLQSMNMHDYSNNNSI
NSNGLSHQYVQFPTYNSQHQDRVFNLDQNGNNTRSL
>AT3G30260_AGL79_SQUA_translation
MGRGRVQLRRIENKIRRQVTFSKRRTGLVKKAQEISVLCDAEVALIVFSPKGKLFEYSAGSSMERILDRY
ERSAYAGQDIPTPNLDSQGECSTECSKLLRMIDVLQRSLRHLRGEEVDGLSIRDLQGVEMQLDTALKKTR
SRKNQLMVESIAQLQKKEKELKELKKQLTKKAGEREDFQTQNLSHDLASLATPPFESPHELRRTISPPPP
PLSSGDTSQRDGVGEVAAGTLIRRTNATLPHWMPQLTGE
>AT3G54340_AP3_DEF_translation
MARGKIQIKRIENQTNRQVTYSKRRNGLFKKAHELTVLCDARVSIIMFSSSNKLHEYISPNTTTKEIVDL
YQTISDVDVWATQYERMQETKRKLLETNRNLRTQIKQRLGECLDELDIQELRRLEDEMENTFKLVRERKF
KSLGNQIETTKKKNKSQQDIQKNLIHELELRAEDPHYGLVDNGGDYDSVLGYQIEGSRAYALRFHQNHHH
YYPNHGLHAPSASDIITFHLLE
>AT3G57230_AGL16_AGL17_translation
MGRGKIAIKRINNSTSRQVTFSKRRNGLLKKAKELAILCDAEVGVIIFSSTGRLYDFSSSSMKSVIERYS
DAKGETSSENDPASEIQFWQKEAAILKRQLHNLQENHRQMMGEELSGLSVEALQNLENQLELSLRGVRMK
KDQMLIEEIQVLNREGNLVHQENLDLHKKVNLMHQQNMELHEKVSEVEGVKIANKNSLLTNGLDMRDTSN
EHVHLQLSQPQHDHETHSKAIQLNYFSFIA
>AT3G57390_AGL18_AGL15_translation
MGRGRIEIKKIENINSRQVTFSKRRNGLIKKAKELSILCDAEVALIIFSSTGKIYDFSSVCMEQILSRYG
YTTASTEHKQQREHQLLICASHGNEAVLRNDDSMKGELERLQLAIERLKGKELEGMSFPDLISLENQLNE
SLHSVKDQKTQILLNQIERSRIQEKKALEENQILRKQVEMLGRGSGPKVLNERPQDSSPEADPESSSSEE
DENDNEEHHSDTSLQLGLSSTGYCTKRKKPKIELVCDNSGSQVASD
>AT3G58780_SHP1_AGL1_AG_translation
MEEGGSSHDAESSKKLGRGKIEIKRIENTTNRQVTFCKRRNGLLKKAYELSVLCDAEVALVIFSTRGRLY
EYANNSVRGTIERYKKACSDAVNPPSVTEANTQYYQQEASKLRRQIRDIQNSNRHIVGESLGSLNFKELK
NLEGRLEKGISRVRSKKNELLVAEIEYMQKREMELQHNNMYLRAKIAEGARLNPDQQESSVIQGTTVYES
GVSSHDQSQHYNRNYIPVNLLEPNQQFSGQDQPPLQLV
>AT3G61120_AGL13_AGL6_translation
MGRGKVEVKRIENKITRQVTFSKRKSGLLKKAYELSVLCDAEVSLIIFSTGGKLYEFSNVGVGRTIERYY
RCKDNLLDNDTLEDTQGLRQEVTKLKCKYESLLRTHRNLVGEDLEGMSIKELQTLERQLEGALSATRKQK
TQVMMEQMEELRRKERELGDINNKLKLETEDHDFKGFQDLLLNPVLTAGCSTDFSLQSTHQNYISDCNLG
YFLQIGFQQHYEQGEGSSVTKSNARSDAETNFVQ
>AT3G66656_AGL91_Ma_translation
MGRRKIKMEKVQDTNTKQVTFSKRRLGLFKKASELATLCNAEVGIVVFSPGNKPYSFGKPNFDVIAERFK
NEFEEEEEGDSCETSGYSRGNRARQEKKICKRLNSITEEAEAEKKHGEDLHKWLESAEQDKFNKPIEELT
LEELKEFEAKIKKISCGIQSNISHMQASSSLMFLSNDN
>AT4G02235_AGL51_translation
MKQSSFSSSSSSRNSTSLTNRLKTIFKKAEELSILCAIDVCVIYYGPDGELRTWPKERNTVKDMASRYKE
ATKRKKKRTLSTLQERLRIVESQKQQNKNLVHQSLTPSYLNQIQHLNPSNFSPYMYNHGDAATLSQLPLS
ASLSNQLQLPESLDAAWFWSEHVFGQHHQQQQLSTSWRVKHTRILTVSFGTSICSE
>AT4G09960_STK_AGL11_AG_translation
MLFPHERKKEKERSQGFYLVTRLRIRMGRGKIEIKRIENSTNRQVTFCKRRNGLLKKAYELSVLCDAEVA
LIVFSTRGRLYEYANNNIRSTIERYKKACSDSTNTSTVQEINAAYYQQESAKLRQQIQTIQNSNRNLMGD
SLSSLSVKELKQVENRLEKAISRIRSKKHELLLVEIENAQKREIELDNENIYLRTKVAEVERYQQHHHQM
VSGSEINAIEALASRNYFAHSIMTAGSGSGNGGSYSDPDKKILHLG
>AT4G11250_AGL52_Mb_translation
MKQASSSSSCNPTSLTNRLKTIFKKAEELSILCAIDVCVIYYGPDGDLRTWPKDRETVKNMALRYKEDRK
RKKCLNLHEFLEKEKVKDKDKYKGKTNYVKNPNWYPNFDHYSPQQLSQLIQSLERTLSTLQKRLRIVESQ
KKQNTNLVHQSLTPSYLNQTQHLDPSKFSLYMYNHGDATLSQLPLSASQSNQLINYQMQHGFGQNMCLDN
ITNNNNFQHPGVSNTQDYSPLLSANNYGLNNHLMQQQDQLHGFDQNLCMMSEIINNNNGLQHPNLSNTVP
HEFPYGNTSFSQDMFSSYDGSSLLQTSSLPPLHNIPNSYCFSDNSRLLC
>AT4G11880_AGL14_TM3_translation
MVRGKTEMKRIENATSRQVTFSKRRNGLLKKAFELSVLCDAEVALIIFSPRGKLYEFSSSSSIPKTVERY
QKRIQDLGSNHKRNDNSQQSKDETYGLARKIEHLEISTRKMMGEGLDASSIEELQQLENQLDRSLMKIRA
KKYQLLREETEKLKEKERNLIAENKMLMEKCEMQGRGIIGRISSSSSTSELDIDDNEMEVVTDLFIGPPE
TRHFKKFPPSN
>AT4G18960_AG_translation
TAYQSELGGDSSPLRKSGRGKIEIKRIENTTNRQVTFCKRRNGLLKKAYELSVLCDAEVALIVFSSRGRL
YEYSNNSVKGTIERYKKAISDNSNTGSVAEINAQYYQQESAKLRQQIISIQNSNRQLMGETIGSMSPKEL
RNLEGRLERSITRIRSKKNELLFSEIDYMQKREVDLHNDNQILRAKIAENERNNPSISLMPGGSNYEQLM
PPPQTQSQPFDSRNYFQVAALQPNNHHYSSAGRQDQTALQLV
>AT4G22950_AGL19_TM3_translation
MVRGKTEMKRIENATSRQVTFSKRRNGLLKKAFELSVLCDAEVALVIFSPRSKLYEFSSSSIAATIERYQ
RRIKEIGNNHKRNDNSQQARDETSGLTKKIEQLEISKRKLLGEGIDACSIEELQQLENQLDRSLSRIRAK
KYQLLREEIEKLKAEERNLVKENKDLKEKWLGMGTATIASSQSTLSSSEVNIDDNMEVETGLFIGPPETR
QSKKFPPQN
>AT4G24540_AGL24_StMADS11_translation
MAREKIRIKKIDNITARQVTFSKRRRGIFKKADELSVLCDADVALIIFSATGKLFEFSSSRMRDILGRYS
LHASNINKLMDPPSTHLRLENCNLSRLSKEVEDKTKQLRKLRGEDLDGLNLEELQRLEKLLESGLSRVSE
KKGECVMSQIFSLEKRGSELVDENKRLRDKLETLERAKLTTLKEALETESVTTNVSSYDSGTPLEDDSDT
SLKLGLPSWE
>AT4G36590_AGL40_Ma_translation
MVRSTKGRQKIEMKKMENESNLQVTFSKRRFGLFKKASELCTLSGAEILLIVFSPGGKVFSFGHPSVQEL
IHRFSNPNHNSAIVHHQNNNLQLVETRPDRNIQYLNNILTEVLANQEKEKQKRMVLDLLKESREQVGNWY
EKDVKDLDMNETNQLISALQDVKKKLVREMSQYSQVNVSQNYFGQSSGVIGGGNVGIDLFDQRRNAFNYN
PNMVFPNHTPPMFGYNNDGVLVPISNMNYMSSYNFNQS
>AT4G37940_AGL21_AGL17_translation
MGRGKIVIQRIDDSTSRQVTFSKRRKGLIKKAKELAILCDAEVGLIIFSSTGKLYDFASSSMKSVIDRYN
KSKIEQQQLLNPASEVKFWQREAAVLRQELHALQENHRQMMGEQLNGLSVNELNSLENQIEISLRGIRMR
KEQLLTQEIQELSQKRNLIHQENLDLSRKVQRIHQENVELYKKAYMANTNGFTHREVAVADDESHTQIRL
QLSQPEHSDYDTPPRANE
>AT5G04640_AGL99_Ma_translation
MGGVKRKISIELIEKKDSRAVAFSKRSRGLYSKASDLCLLSDAQIAIIATPVSSKSNVSFYTFGHSSVDN
VVAAFLTNQRPREGLGLDYWWEDERLSKSEDLEELRDAMDSMSKMLKDLKDLQNQRDCEEDVKKKGVLHG
THQKQTFNPESCSVNFDGFNKNTEEFDLDEIFDYVSTAEALSMNLDMDDVSVVTTNQNPVSASETVEDRE
LVVHKNMDEDNIHVSDMDDKDTMLMISDKNNVLPENLDEFDQELDLDQLLDFETNYESLLKSCEMEDYAS
MVTTKQNLCSNPEAVEDGGLMIQKDLPEDNLCFSDYFSDLHC
>AT5G06500_AGL96_Mg_translation
MARKKVRAAWIRDDRMRRASLKRRLTGLIKKVNELSILCDMRASVVVFNREEEQLTAWPSPEAANSLIDN
FYSLTDHERTMKAVDPESYVQTVIEKIEKKRADTRKVITEFEMDELMFQVQNGRELADLSPTEADKLIPY
ADKKLMWLSKRMGSTGVDALRASNVASGSGGNGLNMMETGRSFYYVDKWVFVDPQVQNPCDVETHLPTMV
SGLDLNMEPSDEDLGTYKGESSMAGGAEDDAE
>AT5G10140_FLC_AGL25_translation
MGRKKLEIKRIENKSSRQVTFSKRRNGLIEKARQLSVLCDASVALLVVSASGKLYSFSSGDNLVKILDRY
GKQHADDLKALDHQSKALNYGSHYELLELVDSKLVGSNVKNVSIDALVQLEEHLETALSVTRAKKTELML
KLVENLKEKEKMLKEENQVLASQMENNHHVGAEAEMEMSPAGQISDNLPVTLPLLN
>AT5G13790_AGL15_translation
MGRGKIEIKRIENANSRQVTFSKRRSGLLKKARELSVLCDAEVAVIVFSKSGKLFEYSSTGMKQTLSRYG
NHQSSSASKAEEDCAEVDILKDQLSKLQEKHLQLQGKGLNPLTFKELQSLEQQLYHALITVRERKERLLT
NQLEESRLKEQRAELENETLRRQVQELRSFLPSFTHYVPSYIKCFAIDPKNALINHDSKCSLQNTDSDTT
LQLGLPGEAHDRRTNEGERESPSSDSVTTNTSSETAERGDQSSLANSPPEAKRQRFSV
>AT5G15800_SEP1_AGL2_translation
MGRGRVELKRIENKINRQVTFAKRRNGLLKKAYELSVLCDAEVALIIFSNRGKLYEFCSSSNMLKTLDRY
QKCSYGSIEVNNKPAKELENSYREYLKLKGRYENLQRQQRNLLGEDLGPLNSKELEQLERQLDGSLKQVR
SIKTQYMLDQLSDLQNKEQMLLETNRALAMKLDDMIGVRSHHMGGGGGWEGGEQNVTYAHHQAQSQGLYQ
PLECNPTLQMGCCFGDDDDDDRYDNPVCSEQITATTQAQAQQGNGYIPGWML
>AT5G20240_PI_GLO_translation
MGRGKIEIKRIENANNRVVTFSKRRNGLVKKAKEITVLCDAKVALIIFASNGKMIDYCCPSMDLGAMLDQ
YQKLSGKKLWDAKHENLSNEIDRIKKENDSLQLELRHLKGEDIQSLNLKNLMAVEHAIEHGLDKVRDHQM
EILISKRRNEKMMAEEQRQLTFQLQQQEMAIASNARGMMMRDHDGQFGYRVQPIQPNLQEKIMSLVID
>AT5G23260_TT16_ABS_Bsister_translation
MGRGKIEIKKIENQTARQVTFSKRRTGLIKKTRELSILCDAHIGLIVFSATGKLSEFCSEQNRMPQLIDR
YLHTNGLRLPDHHDDQEQLHHEMELLRRETCNLELRLRPFHGHDLASIPPNELDGLERQLEHSVLKVRER
KNELMQQQLENLSRKRRMLEEDNNNMYRWLHEHRAAMEFQQAGIDTKPGEYQQFIEQLQCYKPGEYQQFL
EQQQQQPNSVLQLATLPSEIDPTYNLQLAQPNLQNDPTAQND
>AT5G26580_AGL34_translation
MGMKKVKLSLIANEISRETSFMKRKNGIMKKLYELSTLCGVQACTLIYSPFIPVPEFLEMSPTARTRKMM
NQETYLMERITKAKEQLQNLVGANQELQVRRFMFDCVEGKMSQYRYDAKDLQDLLSCINLYLDQLNGRIE
ILKEHGDSLPSVSPFPTRIGVEETGDESSSDSPILATTGVVDTPNATNPRVLVADTTHFLDANATAVTAP
FGFSNHIQYKNMNMSQDLHRPFQHLVPTNFCDFFQNQNMNQVQYQAPPNDMFNQIQREFYNINLNQKSNQ
YMNQQQPFMNPMVEQHMSHVGGRESIPFMDGNYYNYNQLPVVDHGSTSYMPSTTGVYDPYFNNNL
>AT5G26630_AGL35_translation
MTRQKVKMTFIENETARKSTFKKRKKGLLKKAQELGILCGVPIFAVVNSPYELNPEVWPSREAANQVVSQ
WKTMSVMDKTKKMVNQETFLQQRITKATESWKKLRKENKELEMKNIMFDCLSGKTLVSSIEKTELRDFGY
VIEQQLKDVNRRIEILKRNNEPSSALVPVAAPTTSSVMPVVEMGSSSVGFYDKVRDQIQITLNMKQTTND
LDLNKKQW
>AT5G26650_AGL36_translation
MKKVKLSLIANERSRKTSFIKRKDGIFKKLHELSTLCGVQACALIYSPFIPVPESWPSREGAKKVASRFL
EMPPTARTKKMMDQETYLMERITKAKEQLKNLAAENRELQVRRFMFDCVEGKMSQYHYDAKDLQDLQSCI
NLYLDQLNGRIESIKENGESLLSSVSPFPTRIGVDEIGDESFSDSPIHATTGVVDTLNATNPHVLTGDMT
PFLDADATAVTASSRFFDHIPYENMNMSQNLHEPFQHLVPTNVCDFFQNQNMNQVQYQAPNNLFNQIQRE
FYNINLNLNLNLNSNQYLNQQQSFMNPMVEQHMNHVGGRESIPFVDGNCYNYHQLPSNQLPAVDHASTSY
MPSTTGVYDPYINNNL
>AT5G26870_AGL26_Mb_translation
MFKKALELSTLCDIEVCVILYSRDGELIKTWPEDQSKVRDMAERFSKLHERERRKKRTNLSLFLRKKILD
NSKLSEKVLEMKDSLESGLRVLQDKLLLLQPEKNQTELGQIPVINNGQNHW
>AT5G26950_AGL93_Mb_translation
MDSSMSTKKKTKLSVRNQTCFKKSSLSSSSTAKKTTNLSMREQTMFKKALELSTLCNIDVCVIYYGRDGK
LIKTWPDDQSKVRDMAERFSRLHERERCKKRTNLSLFLRKKILDDTKLSEKVLEMEDSLESGLRVLQDKL
LLLQPEKNQTEFGQTRAVSSTTNPLSPPPSLIEDHRHQQRTEPLMSGVSNTEQDLSTSSLSQNQSKFSVF
LYNHDNCSFYQVPDSVSSFDSLTSTGLLGEQGSGLGSSFDLPMVFPPQMQTQTPLVPFDQFAPWNQAPSF
ADPMMFPYN
>AT5G27050_AGL101_Mb_translation
MFKKALELSTLCNIEVCVIYYGRDGELFKTWPEDESKVRDMAERFTKLNERERRKKRTNLSLFLRKKILD
DNKLSGKVLEMKDSLERGLRVLQDKLLLLQPENQTKSLTRSVSSLDYVFV
>AT5G27070_AGL53_Mb_translation
MDSSMSTKKKTKLSVRNQTCFKKSSLSSSSTAKKTTNLSMREQTMFKKALELSTLCNIDVCVIYYGRDGK
LIKTWPEDQSKVRDMAERFSRLHERERCKKRTNLSLFLRKKILDDTKLSEKVLEMEDSLESGLRVLQDKL
LLLQPEKNQTEFGQTRAVSSTTNPLSPPPSLIEDHRHQQWTEPLMSGVSNTEQDLSTSSLSQNQSRISVF
LYNHDNRSFYQVPDSVSSFDQSALLGEQGSGLGSNFDLPPMVFPPQMQTQTPLVPFDQFAAWNQAPSFAD
PMMFPYN
>AT5G27090_AGL54_Mb_translation
MDSSTSTKKNTKLFVRNQTCFKKSSLSSSNAKKTTNLSMREQTMFKKALELSTLCDIEVCVIYYGRDGKL
IKTWPEDQSKVRDMAERFSRLHERERCKKRTNLSLFLRKQILHDKKLSEKVLEMEDSLESGLRVLQDKLL
LLQPEKNQTELGQSCAVYSTTYPLSSPSLIEDHQHQQQWTEPLSNTE
>AT5G27130_AGL39_Ma_translation
MPSSDSTMMKKGTKRKIEIKKRETKEQRAVTCSKRRQTVFSKAADLCLISGANIAVFVTSPSDSSDVVYS
FSGYSSAYEIADCYLNRKPPPKIVNPAGSKLGFWWEDPDLYHSCDDLSELSIIEDRLQRMKKHVMACLEK
EEKSQLVSSFDQNPNSTCSLDVEDCDGSSYSQIASTFTPNSVNEYCSDQTFSSFHGDQNPNLSSPSFDQD
CYSSLYQICGESSSQVASFDQNPSSEIQGFETEEEINQINLLLQETQTEANVNLDDEICFWNDLSNDDVF
GLNSYFGLDNTNAMINFGDSDFRRHV
>AT5G27580_AGL89_Mb_translation
MDSSMSTKKKTKLSVRNQTCFKKSSLSSSSTAKKTTNLSMREETMFKKALELSTLCDIEVCVIYYGRDGE
LIKTWPEDQSKVRDMAERFSKLHERERRKKRTNLSLFLRKKILDDNKLSEKVLEMKDSLESGLRVLQDKL
LLLQPENQTELGQSRAVSSTTNPLSSPEDHHHQQWTEPLVTGVSNTEQDLSTSPLSNHQSKYSVFVYNHD
SGSFYQVPDSICF
>AT5G27960_AGL90_Mg_translation
MKKVKLSLIANERSRKTSFMKRKNGIFKKLHELSTLCGVQACALIYSPFIPVPESWPSREGAKKVASKFL
EMPRTARTRKMMDQETHLMERITKAKEQLKNLAAENRELQVRRFMFDCVEGKMSQYRYDAKDLQDLLSCM
NLYLDQLNGRIESIKENGESLLSSVSPFPTRIGVDEIGDESFSDSPIHSTTRVVDTPNATNPHVLAGDMT
PFLDADANANMNQVQYQAPNNLFNQIQREFYNINLNLNLNLNSNQYLNQQQSFMNPMVEQHMNHVGGRES
IPFVDRNYYNYNQLPAVDLASTSYMPSTTDVYDPYINNNL
>AT5G38620_AGL73_translation
MVKGTKRKIAIETIQKRDSLRVTCTKRRKGLYSKASQLCLLSDAQIAILATPPSSESDVSFYSFGHSSVD
AVVSAFLSGKRPVSAPKDNKETREDVGICLTRKNLGLGFWWNDESLVRSENPQEISEAIGSMWTLLSNLK
ELRADEACVNDHKDLKKNEKSDVHGTQDQTLIFQSASAVCCIPENLNDITQEPNQTLDIQSSSSAICCVP
DKSPEIFNEITEEQDQILSICETFCVTDNNNNNNNNAALPEVNLYYNQDMAIDQLIDFNTPFESSIDDWF
SDNTTHQETTSASILNDVGVDDQVSVDTNPFSYFQSLEDADLVFQRCLDGDNLRFSDCFNDFANTIAAV
>AT5G38740_AGL77_Mb_translation
MTTIRSSPSSSRCSNSSSSSSYSLASTSLSNRLETIFKKASELCTLCDIEACVIYYGPDGELKTWPKERE
KVRDIALRFNQLNEALRHKKSVNLHGFLNKKKKNKGLKNPNKKKKTSLKNVNVLKYPLADHYSPDQVSQL
TQSLELNVSKFQERLRFLESQKQNETKPDHQSLTSISSLNQSLNPSQFSLFMYNHGYNTLSQIPVSASNF
NQDYISALLEQSELKSQIMKQEVCGYEQNMCMSNHGDATLSQIPFSASNFNQDFSANNNFQHSFVSNTQD
YYSVQKSVNNNYGLKNQLMKHDLCGYEHNMCMSNHGDATFSQIPLSASNFNQDFSVSIQEESGLMQQELC
GYDQNQNMSMGDITNNNFQVTCASVLESVNNFGLNQLMHKEFYGCHQNMSMGNINNNSFQHPWVSNADHT
RRYKNL
>AT5G39750_AGL81_Mb_translation
MAIRSLPSSSRCSSSSSSSSYSLASTSLSNRLETIFKKASELCTLCDIEACVIYYGPDGELKTWPPEREK
VEDIALRYSQLNEALRRKKSVTLYDFLNKKKDKTNLEKKAKITDNDDLKTCLKNVNILKYPLADHYSPDQ
VSQLIQSLEPHVSKVRERIRFVESQKHKETKPDHQSLASSSLNHQTQSLNPSQFSLFMYNHGDNTLSQIP
VSASNFNQDYFSALLEQSELKSQIMKQDLCGYEQNMCMSNHGDATLSQIPLSASNLNQDFSALLQDESGL
MQQELCGYDQNMFMNNNNFQHSFVSNTQDHSAPVVQESVNNNYGLMPHVPCGYDQNLFTSDITNNNLLIN
NSMFL
>AT5G39810_AGL98_Mb_translation
MAIRSLPSSSGCSNSSSSSSYSLASTSLSNRLETIFRKASELCTLCDIEACVIYYGPDGELKTWPPEREK
VEDIALRYSQLNEALRRKKSVTLYDFLNKKKNKTNLEKKAKIKDNDLKRLSLEPHVSKVRERIRFVESQK
HKETKPDHQSLASSSLNNQTQSLNPSQFSLFMYNHGDNILSQIPVSASNFNQDYFSALLEQSELKSQIMK
QEVCGYEQNMCMSNNGDATLSQIPLSASNFNQEFSALLQEESGLMQQELCNYDQNMFMNNNNFQHSFVSN
TQDHSAPAVQESVNNNYGLMPHVPCGYDQNLFTSDITNNNLLIDNSMFL
>AT5G40120_AGL76_Mb_translation
MTMRSLPFSSSSYSLASTSLSNRLETIFKKASELCTLCDIEACVIYYGPDGELKTWPKEKEKVRDIALRY
SQLNEALRSKKSVNLHGFLNKKKKKKKKGLKNPNNKRKTCLKKNVNVLKYPLADHYPPDQVSQLTQSLKL
HVSKFQERLRFLESQKQTKPDHQSLTPSSLNHQTQSLNPRQFSLFMYNHGDNTLSQISVSASNFNQNYFS
ALLEQSELKNQLMKQDGYDQNQNMRMGDITNNNFQLPYFSKKEAVQESVNYFGMNQLMLKELYGCDQNMC
MGNINSNSFQHPCVSKAQHYSAVEGSVNNQRQSELMQQELCGYEQNMCFTNNNFQVSNKEAVQESVTNFG
LMQHELYGCDQNMSMGNIINNSFQQRLKHRTRICE
>AT5G40220_AGL43_Mb_translation
MTMRSSLPSSSSAYSLASTSLSNRLETIFKKASELCTLCDIEACVIYYGPDGELKTWPPEREKVRDIALR
YSQLNEALRRKKSVNLHGFLNKKKKNKGLKNTDKKRKTSLKKVNVLKYPLADHYPPDQVSPLIQSLELHV
SKFHERLEFLESRKQNETQPDHHSLASSSLNHQTQSLNPSQFSLFMYNHGDNTLSQIPVSASNFNQDYFS
ALLEQSELKNQLMKQEICGNDQNQNMWMGNITNNNFQLPCVSVQESVNNFGLMHKEFYGCDHNMSVGNIN
SNSCEHPCVSSTQHYSAVEESVNNPWLNQLMQNELYGYGYADFC
>AT5G41200_AGL75_Mb_translation
MTMRSSSPSSSSSYSLAFTSLSNRLETIFKKASELCTLCDIEACVIYYGPDGELKTWPKEKEKVRDIALR
YSLLNEALRRKKSVNLHGFLNKKKNKGLKNPNKKMKTSLKNVNILKYPLADHYPPDQVSPLIQSLELHVS
KFQERLRFLESQKQNQTKPDHQSLTPSSLNHYTQSLNPSQFSLFMYNHGDNTLSQIPVSASNFNQDYFSA
LLEESELKNQLMKPEICGYDQNQNMSMGDITNNKFQDPCVSNKEAVQESVNNFGLNQLMYKEFYGCDQNM
SMGNINSNSFQNPCVSNTQHYSAVEESVKNPWLNQLMQNELYGYGYAGFC
>AT5G48670_FEM111_AGL80_Mg_translation
MTRKKVKLAYISNDSSRKATFKKRKKGLMKKVHELSTLCGITACAIIYSPYDTNPEVWPSNSGVQRVVSE
FRTLPEMDQHKKMVDQEGFLKQRIAKATETLRRQRKDSRELEMTEVMFQCLIGNMEMFHLNIVDLNDLGY
MIEQYLKDVNRRIEILRNSGTEIGESSSVAVAASEGNIPMPNLVATTAPTTTIYEVGSSSSFAAVANFVN
PIDLQQFRHPAAQHVGLNEQPQNLNLNLNQNYNQNQEWFMEMMNHPEQMRYQTEQMGYQFMDDNHHNHIH
HQPQEHQHQIHDESSNALDAANSSSIIPVTSSSITNKTWFH
>AT5G49420_AGL84_Ma_translation
MVKKGGTKRKIAIETIQKRDSLRVTCTKRREGLYSKASQLCLLSDAQIAILATPPSSESNVSFYSFGHSS
VDAVVSAFLSGQRPVPKDNKETREDVGICLTRNNLGLGFWWNDESLARSENPQEISEAIDSMRTLLRNLK
ELRADEALACNQAFVNDREDLKNNDKCDFVSDHETHDQTLILQSASPICCIPENLNEITQEPNQTLNIQS
STSAICCVPDNSPENFNEITEEQDQIRSICETFCVMDNNAALPEMNLDYDQDIGFDTPFESALNDWFSDN
TTHQEISASILNAVVDDQVSVDLTPFSYFQRCLDGDNLRFSDCFKDFANTISAL
>AT5G49490_AGL83_translation
MRFVPYLYEIERLWLSLVNYLSPRKNKNRRCGEIDKIRMVKKGGTKRKIAIETIQKSDYLRVTCTKRREG
LFSKASQLCLLSDAQIAILATPPTSESNISFYSFGHSSVDAVVSSFLSGQRCVPLQEDTKEMREDVAICL
SRTNLGLGFWWNNESLNKSENPQEISDAINSMLTLLSNLKELSGEEALVNDHKDLKKNERSDVVLQHGTQ
YETLNPNSNTTTICCVPDELPANSNEIVGISPNPLIMLEKKKSQIEEKFEKEWQVSVTRIENEATSSYAK
RRRSI
>AT5G51860_AGL72_TM3_translation
MVRGKIEIKKIENVTSRQVTFSKRRSGLFKKAHELSVLCDAQVAAMIFSQKGRLYEFASSDIRNTIKRYA
EYKREYFVAETHPIEQYVQGLKKEMVTMVKKIEVLEVHNRKMMGQSLDSCSVKELSEIATQIEKSLHMVR
LRKAKLYEDELQKLKAKERELKDERVRLSLKKTIYTHLCQVGERPMGMPSGSKEKEDVETDLFIGFLKNR
P
>AT5G51870_AGL71_TM3_translation
MVRGKIEIKKIENVTSRQVTFSKRRSGLFKKAHELSVLCDAQVAAIVFSQSGRLHEYSSSQMEKIIDRYG
KFSNAFYVAERPQVERYLQELKMEIDRMVKKIDLLEVHHRKLLGQGLDSCSVTELQEIDTQIEKSLRIVR
SRKAELYADQLKKLKEKERELLNERKRLLEEVNMHHSSKGNTEGGHRTKHSSEVETDLFIGLPVTRL
>AT5G55690_AGL47_Mb_translation
MGRKMVKMTRITNEKTRITTYKKRKACLYKKASEFSTLCGVDTCVIVYGPSRAGDEMVMEPELWPKDGSK
VREILTKYRDTASSSCTKTYTVQECLEKNNTKVEKPTIATKYPTWDKKLDQCSLNDLYAVFMAVENKIQE
ATNRNQTFPDTSCWSNDQLGLCGYNRQCFEQYQLFPLPTMDYNGLSFFPFNNQMTSNTAEVSSFSNVTEP
MIANGQSLFYGSCSDGPYGPMVQRTAYMEPIHWGLGNSMFNNVKQFQDYPFRFAQVNDLEDSSKLSM
>AT5G58890_AGL82_Mb_translation
MVPKVVDLQRIANDKTRITTYKKRKASLYKKAQEFSTLCGVETCLIVYGPTKATDVVISEPEIWPKDETK
VRAIIRKYKDTVSTSCRKETNVETFVNDVGKGNEVVTKKRVKRENKYSSWEEKLDKCSREQLHGIFCAVD
SKLNEAVTRQERSMFRVNHQAMDTPFPQNLMDQQFMPQYFHEQPQFQGFPNNFNNMGFSLISPHDGQIQM
DPNLMEKWTDLALTQSLMMSKGNDGTQFMQRQEQPYYNREQVVSRSAGFNVNPFMGYQVPFNIPNWRLSG
NQVENWELSGKKTI
>AT5G60440_AGL62_Ma_translation
MVKKSKGRQKIEMVKMKNESNLQVTFSKRRSGLFKKASELCTLCGAEVAIVVFSPGRKVFSFGHPNVDSV
IDRFINNNPLPPHQHNNMQLRETRRNSIVQDLNNHLTQVLSQLETEKKKYDELKKIREKTKALGNWWEDP
VEELALSQLEGFKGNLENLKKVVTVEASRFFQANVPNFYVGSSSNNAAFGIDDGSHINPDMDLFSQRRMM
DINAFNYNQNQIHPNHALPPFGNNAYGINEGFVPEYNVNFRPEYNPNQNQIQNQNQVQIQIQNQSFKREN
ISEYEHHHGYPPQSRSDYY
>AT5G60910_AGL8_FUL_SQUA_translation
MGRGRVQLKRIENKINRQVTFSKRRSGLLKKAHEISVLCDAEVALIVFSSKGKLFEYSTDSCMERILERY
DRYLYSDKQLVGRDVSQSENWVLEHAKLKARVEVLEKNKRNFMGEDLDSLSLKELQSLEHQLDAAIKSIR
SRKNQAMFESISALQKKDKALQDHNNSLLKKIKEREKKTGQQEGQLVQCSNSSSVLLPQYCVTSSRDGFV
ERVGGENGGASSLTEPNSLLPAWMLRPTTTNE
>AT5G62165_AGL42_TM3_translation
MVRGKIEMKKIENATSRQVTFSKRRNGLLKKAYELSVLCDAQLSLIIFSQRGRLYEFSSSDMQKTIERYR
KYTKDHETSNHDSQIHLQQLKQEASHMITKIELLEFHKRKLLGQGIASCSLEELQEIDSQLQRSLGKVRE
RKAQLFKEQLEKLKAKEKQLLEENVKLHQKNVINPWRGSSTDQQQEKYKVIDLNLEVETDLFIGLPNRNC
>AT5G65050_AGL31_MAF2_FLC_translation
MGRKKVEIKRIENKSSRQVTFSKRRNGLIEKARQLSILCESSIAVLVVSGSGKLYKSASGDNMSKIIDRY
EIHHADELEALDLAEKTRNYLPLKELLEIVQSKLEESNVDNASVDTLISLEEQLETALSVTRARKTELMM
GEVKSLQKTENLLREENQTLASQVGKKTFLVIEGDRGMSWENGSGNKVRETLPLLK
>AT5G65060_MAF3_AGL70_FLC_translation
MGRRKVEIKRIENKSSRQVTFSKRRKGLIEKARQLSILCESSIAVVAVSGSGKLYDSASGDNMSKIIDRY
EIHHADELKALDLAEKIRNYLPHKELLEIVQSKLEESNVDNVSVDSLISMEEQLETALSVIRAKKTELMM
EDMKSLQEREKLLIEENQILASQVGKKTFLVIEGDRGMSRENGSGNKVPETLSLLK
>AT5G65070_MAF4_FLC_translation
MGRRKVEIKRIENKSSRQVTFCKRRNGLMEKARQLSILCESSVALIIISATGRLYSFSSGDSMAKILSRY
ELEQADDLKTLCLNIVERDQHRITLFFTVGIALESPRRGSKLDLEEKTLNYLSHKELLETIQCKIEEAKS
DNVSIDCLKSLEEQLKTALSVTRARKTELMMELVKTHQEKEKLLREENQSLTNQLIKMGKMKKSVEAEDA
RAMSPESSSDNKPPETLLLLK
>AT5G65080_MAF5_AGL68_FLC_translation
MCRKSEAMGRRRVEIKRIENKSSRQVTFCKRRNGLMEKARQLSILCGSSVALFIVSSTGKLYNSSSGDSM
AKIISRFKIQQADDPETLDLEDKTQDYLSHKELLEIVQRKIEEAKGDNVSIESLISMEEQLKSALSVIRA
RKTELLMELVKNLQDKEKLLKEKNKVLASEVGKLKKILETGDERAVMSPENSSGHSPPETLPLLK
>AT5G65330_AGL78_Mb_translation
MKQASSSSSSRNSTSLTNRLKTIFKKAEELSILCAIEVCVIYYGPDGELRTWPKERETVKDMALRYKEAR
KRKKSRNLHEFLEKEKDKDKGKTNLKKNWYPNFDHYSPQQLSQLIQSLERTLSTLQERLRIVEAQKLQNT
NLVHQSLTPSYLNQTQHLNPSKFSLFMYNHGDATLSQLPLSAPHSNQLINYQNHLMQHGFGQNMCSDNIT
NNNFEHPGVSNTQDYSPLLSVQASAVNNYGLNNHLMQQQDQLHGFDQNMCMVSEIINNNNGLQHPNLSNT
VPHEFSSDFNQNPYGNAVGNISFSQDMFSSYDASSLLQTSSLPPLHNIPSSYCFPGNSRLL

## Sheet: Vv_MADS_protein_seqs
>VvAG1_translation
MGRGKIEIKRIENTTNRQVTFCKRRNGLLKKAYELSVLCDAEVALIVFSSRGRLYEYANNSVRTTIERYK
KVCSDSSNTGSVSEANAQFYQQEASKLRRQIRDIQNLNRHILGEALSSLNFKELKNLETRLEKGISRIRS
KKNELLFAEIEYMQKRVNNASYFICLFGFFFFFLLLVLRVIFAFQHTQLQLSSN
>VvAG2_translation
MDTKLVTCPNRSERNGTTNPEKEILSPVESDQRDEKGGQRWTRPATTDFQNQSREVSPQRKMGRGKIEIK
RIENTTNRQVTFCKRRNGLLKKAYELSVLCDAEVALIVFSSRGRLYEYANNSSVKSTIERYKKASADSSN
TGSVSEANAQDLKSLEIRLEKGISRIRSRKIAENERNEQQMSLMPGGANYELMPSQQFDSRNYFQLNGLQ
PNQSYSRQDQPALQLV
>VvAG3_translation
MGRGKIEIKRIENTTNRQVTFCKRRNGLLKKAYELSVLCDAEVALIVFSSRGRVYEYSNNNIKSTIDRYK
KASSDSTNGGSTMEINAQYYQQESAKLRQQIQMLQNSNRHLMGDSLASLTVKELKQLENRLERGITRIRS
KKHELLLAEIEYLQKREIELENESVYLRTKIAEVERLQQANMVSTHEFNAIQALVSRNFFQPNMIEGGST
GYPLPDKKVLHLGYTHLSPCLFICILSRSNIED
>VvAGL6_translation
MGRGRVELKRIENKINRQVTFSKRRNGLLKKAYELSVLCDAEVALIIFSSRGKLYEFGSAGTTKTLERYQ
RVCYTPQDNNMECETQSWYQEVSKLKAKYESLQRTQRHLLGEDLGPLSVKELQNLEKQLEGALAQARQRK
TQMMIEQMEDLRRKERQLGDLNKQLKLKLEAEGQSLKAIQGSWNPSTATAGNSSFPVHPSQSNPMDCEPE
PILQIGYHHYVPAEGPSVSKSMAGESNFIQGWVL
>VvAGL12_translation
MARGKIQMKRIENPVHRQVTFCKRRAGLLKKAKELSVLCDAEIGIFIFSAHGKLYELATKGTMQGLIEKY
MKSSCGSQDDQAKEAQLLDTKEEINMLKHEIELLQKGLRYMLGGGAGTMTLDELHIFEKHLEIWIYNIRS
AKMEIMFQEIQLLKNKEGILKAANNYLQEMIDDQTGITNIAPMINPYPLTTQNEIFQT
>VvAGL15_1_translation
MGRGKIEIKKIENANSRQVTFSKRRVGLLKKASELAILCDAQVGVIIFSNTGKLFEFSSTSMKRIISRYN
KLDSSEGALVEYKAEEQVLMEQLEQSRVQVEELRGLVPSSDRLVPPFLEYHPLERKDSITKSVVISPDVC
DFAVEREESDTTLQLGLPTEISRKRKAPAKMETRSNNSGS
>VvAGL15_2_translation
MGRGKIEIKKIENINSRQVTFSKRRAGLLKKAKELSVLCDAEVGVIIFSSTGKLYEFSSSSMEHTLTRYG
RGLDSELPSLHRSAEESQPEVASLKEEVAKLQKGYLRMMGKELDGLSFKELQHLEHLLSEGILSVKDKKE
QVLLEQLKKSRMHEQRAMMENETLRKQVEELRRSSRPQPPSFIEYHPPERRQSLQISSKTPCSCSTVDER
GGSDTSLHLGLPSDAYLKRKGPKIEPIFIDSESQVASE
>VvAGL17_1_translation
MGRGKIVIRRIDNSTSRQVTFSKRRSGLLKKAKELAILCDAEVGVIIFSSTGKLYDYASTSIKSITERYI
KAKEEHQQLVNPTSEVKFWQREAAMLRQQLQHLQENHRQMMGEELSGLSVKDLQNLENQLEMSLRGVRMK
KDQILIDEIQELNQKGNLLHNENVELYKKVNLIRQENMELYKKVYGTREVNGTNRNAFTNGLSIGEDLHV
PIHLQLCQPQQQNYETTPARATKLG
>VvAGL17_2_translation
MGRGKIVIRRIDNSTSRQVTFSKRRNGLLKKAKELSILCDAEVGLVIFSSTGKLYDYANTSVNSVIDRYN
KLKEEQHQVLNPASEVKLWQREAASLRQQLQYLQDTHRQLLGEELSGLGIKDLQNLENQLEMSLKGVRMK
KEKILTDEIRELNQKGSLIHQENIDLYKKVDLIRQENMELQKKVYRAVNLNESNRSSQVSHGFSNGFDLH
VPINLQLSQPHNNETPEKAMELG
>VvAP1_translation
MGRGRVQLKRIENKINRQVTFSKRRTGLLKKAHEISVLCDAEVALIVFSTKGKLFEYSTDSCMEKILDRY
ERYSYAERQLTATDPESQGNWSLEYSKLKAKIELLQRSQRHFLGEDLDSLSLKELQNLEQQLDTALKHIR
SRKNQLMYESISELQRKEKAMQEQNNMLAKEIKEKEKTVAQQTHWEQQNHGLNTSSFLLPQQLPCLNMGG
TYQGEAHGARRNELDLTLEPIYPSHLGCFTT
>VvAP3_1_translation
MARGKIEIKRIENSTNRQVTYSKRRNGIFKKASELTVLCDAKVSIIMLSSTGKLHEYISPSTTTKQIFDQ
YQNTLGVDLWSYHYERMQENLKKLKDVNKNLRKEIRQRMGEHLSDLSVEELRDLEQEMESSLKMVRDRKY
QVINNQIETFKKKVRNVEQIHKNLLHEFDARDRDQHYGLVDNGGDYESVLGFSNGSSPVFALSLQPNPPN
DLHSGVGSDLTFTLLE
>VvAP3_2_translation
MARHASLCRCKAIEIKRIENPTNRQVTYSKRRNGIFKKAQELTVLCDAKVSLIMFSNTGKFHEYTSPTIT
TKKVYDQYQKTLGIDLWSSHYEYHVIKTQTETYRKKVRNLEEQHGNLLLNFEAKCDDPHYGLVENDGDYE
SAVAFANGASNLYAFRLHQAHPNLHHDGGYGSHDLRLA
>VvBS1_translation
MGRGKIAIRRIENQTSRQVTFSKRRAGLLKKTHELSVLCDVQIGLIIFSSTGKMCEYCTEPWRMDQIIER
YQKVTGTRIPEHDSREQIYNELTRMRKETSRLQRSMRGYTGEDLSSIPYEDLDQLEQQLEHSADKVRARK
NQLLQQQLDNLRRKEQMLEEENSKMYHWIKENRAALDYQQAAIEVKPVEHHHQMLDQFPFFGEEGPNSVL
QLSTIHPQLHPYGLQLTQPHLQDSRSQYSK
>VvBS2_translation
MGRGKIAIRRIENNTNRQVTFSKRRGGLFKKAHELSVLCDAQIGLIIFSSTGKLSEYCSLPSSMEQIIRR
YQRVTGTHISKQDNREQLHNEITRMRNETHNLQLSLQRYTGDDLSSIQFKDLEELEQQLEHSIKKVRARK
YQLLQQQIDNLQRKAKMLEDENEQICHWEKQQVAAMEQQQLGIELKPVEEQQVMEQFPFSGEEQPNSVLQ
LATLSPHFYPYRLQPTHPNLQDLTLQYPGFGSIGTTPTVSSIILTIYNNLRNIFSLHFSWPTYDHCRIIS
CHP
>VvFLC1_translation
MGRKKVELKRIEDKSSRQVTFSKRRNGLIKKARELSVLCDVDVAVLVFSSRGKLYEYANGNSTLRHQR
>VvFLC2_translation
MGRGKFQLKRIENKNNRQVTFSKRRSGMMKKAHELSILCDVDLALIIFSARGRLYEFCSGNSVLNYCIKH
KHLSSLLLHSSSEDHLLLHSSSGNQPHLHNNALIPKVASSSNPNMSLPQSYVVSTPSLLGLPSPNTSTKS
SFLLVLDSSASHHMSPSSSSFVYVLRNIIESYLQISRDAEANVGSSSHEAKQKRYPVRWAGADLLKIVES
QVEGPRIEQLRLSELSQLEQKLDGMLRQTRRRKTQLMMEAIACLKEKVKELNEQKQQMEKMIAAAESKDA
LQHEDLVMEQAGNNSKPPPQNVVLQLL
>VvFUL_L_2_translation
MGRGRVQLKRIENKISRQVTFSKRRSGLLKKAHEISVLCDAEVALIVFSTKGKLFEYSSDSSMERILERY
ERYSLSERQLLSTDPDPQGNWSMDYPKLTARIEVLQRNLRHFVGEDLDPLSLRELQNLEQQLDTALKRIR
TRKNQLMHESISELQKKEKSLVEQNNALAKKVKEKEKVEQNNRAQWEQQNNIGQNSSAYVVPPPPLQLPS
LTIGGSFVGRAVEEDGAEARPSPNTLMPPWMLRHVNE
>VvFUL_L_translation
MGRGRVQLKRIENKISRQVTFSKRRSGLLKKAHEISVLCDAEVALIVFSTKGKLFEYSSDSSMERILERY
ERYSLSERQLLSTDPDPQGNWSMDYPKLTARIEVLQRNLRHFVGEDLDPLSLRELQNLEQQLDTALKRIR
TRKNQLMHESISELQKKEKSLVEQNNALAKKVKEKEKVEQNNRAQWEQQNNIGQNSSAYVVPPPPLQLPS
LTIGGSFVGRAVEEDGAEARPSPNTLMPPWMLRHVNE
>VvFUL_translation
MGRGRVQLKRIENKVNRQVTFSKRRSGLLKKAHEISVLCDAEVALIVFSTKGKLYEYSTDSCMERILERY
ERYAYAQSQLIATDLESQGSWTLEYAKLKARMEVLQKSQRNFMGEDLDSLSLKELQNLEQQLDNSLKSTR
TRKNQLMYESLSELHKKGKALQEEHDLLTAKVQEKEKEQAEQAQWNQQNQDLDSPSFLLQQPLHALNISG
NCLARDSGDDQGIPPQNRTNTPLPAWMLRHVNK
>VvMADS9_chr7_arabidopsis_translation
MGRVKLQIKRIENNTNRQVTFSKRRNGLIKKAYELSVLCDIDIALIMFSHSGRLSHFSGKRRVEDVLTRY
INLPDHERGGIVHNREKYLLSNHLSTYDPASIQLEGKSMQAYLDSQEGLPTSFENEVMGWLPENGHNHTQ
MFGSDPCVPLRNHPSTNVYDNLGHGTSINVDPINMGGCHISNSGCEGLPPWHHSYTSTELLSALMPQPSY
PPPKHEMAPGSIIPTMMPHQQMEATSNCQHLPSGEDDSAYDKAQLPQLHVE
>VvMADS11_chr18_rice_translation
MGRVKLQIKKIENTTNRQVTFSKRRNGLIKKAYELSVLCDVDVALIMFSPSGRVSLFSGNKSIEEIMTRY
VNLPEHERGRSYKGLLEIQQEILKYKSQLDDMQKRLRIFEGDPSEITTVREVEYREQILEETLKQVRFQK
VHLPPETANVNGFISGNPNNMLDWLPPRDPQVQILNFLDSNGLLPMREQPQRMVEILPPSSTLLPGQNIH
LEDHMSPSSGMEEDNNVQRPQFGPAIDVNLSPWAEFYPTADMLAGNGSYPAAQPRGPALLELFLSQFTP
>VvMADS16_chrUnrandom_rice_translation
MGRGKIEIRRIDNTTSRQVTFSKRRKGLLKKAKELAILCDAEVGLIIFSSTGKLYEFASTSETLSNPEPL
PEGNGFQCTRQCIHPRVPQLAVIGFSESVSNLYTSEMRSRWLAEFLDGTFKLPSIKEMEKDAERWDQYLK
RYSEKHYRRSCIAALHIWYNDQLCKDMGWNPKRKKGFFAELFEPYGPLDYRPIS
>VvMADS17_chr16random_rice_translation
MGRGRVVLQRIENKINRQVTFSKRRNGLLKKAYELSVLCDAEIGHEEYSKLKAKYESLMDSQRHLLGEDL
GLLSIKELQNLEKMLEGTLSQARQRKVRNSQPTPSPMDNSGFDRSHRISRVGNKLGGLNLFQVTTLTTSN
SLRNLKNVFE
>VvMADS31_chr2_arabidopsis_translation
MGRGKITIKKIEDKTVRQITFSKRRAGLLKKTHELSVLCDAQIGLIIFSNTGKMFEYCSNSSRMEQIVER
YQKAKGTFKHDNKLKIHHIDELKRIRDETHHLQLTLQHHSTTHDLSSIRYEDLEELEQQLEHSMNKVRVL
KEQMVEENSTTHMCHWAQEGQTALVHQATTTKSNQVEHQQQHQVVLDQYLPLFREQPSNAVLQLVPIPPQ
FHPYHYLPGSY
>VvMADS37_chr6_rice_translation
MARQKIQIKKIDNTAARQVTFSKRRRGLFKKAQDISILCDAEIALIVFSAAGKLFEYSSSRSDMGEEFPK
LRVRWHGSSRCWSWIQILYLIDDQEGSEEIAE
>VvMADS38_chr18_arabidopsis_translation
MGRGKQEMRRIEDKATRQVSFSRRKKGLIKKAYELSVLCDIDIALIMFPPSGRLTQFSGKKRMEEVFTRY
MHLTDEEREEVIQNTEEYLSGNHLFSYDLSSSQHEVGEQGMAEVQIPPDEACSSEGA
>VvMADS39_chr7_arabidopsis_translation
MGRQRVEIKKIENKAVRQVTFAKRRNGLLKKAYEISTLCDIEVALLAFSPSGKPTIFGGKKRFDQIFAHY
INLPEYQEGGLEDHEQALEANHRGPQPEKNYLAAPLLEKPVQVPNAEMLTGGGQSQAPDVGLLTGGGHAN
TSRASAVAGGGGVISANATTVGGSSIYNINSKSTVPQTSMLNFVDSNGPSPTSSFVCPFSSRNQQQYLNG
ILPQAPLFLLEDRNLVAHPLTNEGNEVRSYYLELARRMGLPLPGLTIGNAPTGAQHDPPGRGGPDGRAGP
SGQASFQATRHPRD
>VvMADS41_chr17_arabidopsis_translation
MGRVKLKIKRLESTSNRQVTYSKRRNGILKKARELSILCDIEIILLMFSPTGRPTLFHGARSDIEEVIAK
FAQLTPQERAKRKLESLEALKKTFKKLDHDVNLQDFLGASTQTIEVRFHASIANAPNNLRQELTNQARLL
QAQLTEVHKRLSYWSNPDKVDSTEHLRQMEDSLRESLNRIRVHKFQNGMHLPLIMDGVQEAQPLSWLPNN
ENQHLILPEEPSYLPQRDMECSADASIPGYSGYYSTGKQTEIGNSGQVDEQGQEGSALNQLSGNSNLRLQ
LSEQYLYSPFGNLNLPDEKKLKPEMEMNLQGNPVDYQVNGNFEIPAPIYDNRQHTWVSASGPCSIAMFDE
NSFSQGNVPPIVHSAFPDSH
>VvMADS44_chr12_arabidopsis_translation
MGRKKLVMQKLGNPSSRQVTFTKRKDGIVKKATELSILCGADVGLIMFSPKGRSITFASGGRVEDIFIRW
IAQAAELTGQGIYNPDVEKINTVHEAQEHQQFLVDAIQRIEQLKVKLLSDQITLEKPESSQVTRTKNADP
TTEGLNDANTSRNLPGGEHHEETAFPAGPHLTMSYLKAQNLAGEGTSCWFDDN
>VvMADS45_chr1_arabidopsis_translation
MHWQVVRILQPPFKIIRRYQRVTGTHISKQDNRDQRHNELARMRNEKHNLQLNLQRNTDDDLSFIQFKEF
DELEQQLEHSIKKVGARNPWEYMHAVLASLTADRQSSEEDPGKAAGNNNGAAATAGN
>VvMADS46_chr19_arabidopsis_translation
MEKKQTKGRQKIEMKRIPNEEDRLITFSKRRSGIYKKASELSTLCGAEVGVLVFSPAGKAFSFGQPSIEK
ITNKVLYENPPPNDNTLNLVEAHRRFRLNELHQKYSELLSKMEVAKEQEKILRKKVPNRSKGWWEEPISE
LSMHELEQMAIKIQMLHKHVQHRANELWTRASSSSLPFSVVNQTPSTNPFSMTEVEQKY
>VvMADS47_chr13_rice_translation
MGRRKIEIKKIESKDRLMVTFSKRRAGLFKKAQQLSQLSGATVAVLVFSPVGKPFTFSSGGNFDETIASF
QGGQVPESSSQLDPSLWETCGTHLTVTRGTHHHPNHHHPDSPKDVHKAVLLSGPPQGKAKDVLASPIQGR
ANDADRAQTSGQPS
>VvMADS48_chr7_arabidopsis_translation
MSDLAKWELESPISNCGSPLCEGNLAFDSSSSRLEMERKTNAGRKKIEMKLISASDARQVTFSKRRSGLF
KKASELATLCDSETAVIAFSPGGKAFSFGHPSVEAVINRYDGQSQALDAGDQSVQTDNLRELIQRYNALL
DQLEVEKKRGEAIKRMGMEMKAKTWLLTPVENLNPTQLQILKVLMEDLKKRVYQQREELSKKARTPRPLL
DLNTVEPDDPSASNPTKNNSMEGGGGSE
>VvMADS49_chr1_rice_translation
MATVRKSKGRQRIEIAKIKNESNLQVTFSKRRAGLFKKASELCTLCGAETAIIIFSPGKKIYSFGHPCIE
SIIDRFLARNPFLNAGALQLFQAHRSANINELNMELTEVLKEVEAEKKRGEALDKTTKAFQRQCWWAAPV
EELNLEQLQMLKVSLEMLRKKVERQADKLIIEASEPPAFSAPYSVGAIPPYEPQTAGFDPQGSTFGFDEK
KIYSFGHPCIESIIEAEKKSAGG
>VvMADS50_chrUnrandom_arabidopsis_translation
MEVATVNSRKNTGRKKIEIRKIEKKSSLEVTFSKRRAGLFKKAGELCVLCGAEAAVIVFSPGGRAFVFGH
PTADAVIDHFLGRDTDTSSRGVVPAEQVVHGQVQRQYLEAVGRAEVKEEGGFWWDAPIENMGLNELEQFK
GSLEKLREKVADRVAEITLMMVMDSESGAGPSSTTMVEYAAPPQEYNSSAVLHARDLAADSHSQAVPQGF
HFGFGFDEPRFW
>VvMADS51_chr3_arabidopsis_translation
MLLAMVKKPSKGRQKIEISKIPKKNHLQVTFSKRRSGLFKKASELCTLCGANVAIIVFSPAGKVFSFGHP
DVESIVDRFFTCNPIPEPNGLHLIEAHRNASVRELNLQLTQVLNQLEAEKKRGEILSQMRRASQTQCWWE
APINELSMPELEQLKVSMEELKKVVLSQGDKLLMEAANPSPFYMINGSSAMVDHFEIERKPSEIHGNVHN
FGYGQGFF
>VvMADS52_chr10_arabidopsis_translation
MEVANVNSRKNMGRQKIEIRKIEKKNSLLVTFSKRRTGLFKKAGELCVLCGVEAAVIVFSPAGRAFVFGH
PTADAVIDRFLGRDTGTISRAVVPAEQVVHGQVQRQYLEPVGRAEAKKEEGGFWWDAPIENMGLNELEQF
KGSLEKLRKKVADRVEEMTSMMVMESESGAGPSSTTMVEYAVPPQAYNSSAVLHARDLAAHSHSQAVPQG
FDFGFGFDEPRFW
>VvMADS53_chr3_rice_translation
MVEKSSKGRQKIEIAKIPKKNHLQVTFSKRKSGLFKKASELCTLCGANIAILVFSPGGKVFSFGHPDVRY
IVYSFFANIPPTKRSDLNLIEAHDQNASIHKLNLQLAEVLNQLEAEKKRGEILGQIRASQGQCWWEAPID
ELSLFELQQLKVSMEELKKIVVSQAELLLMEGNANPSTFNKVNGYPMVDDFEFERKLSEIHGLSIVPHVH
NFGHGLGFF
>VvMADS54_chrUnrandom_arabidopsis_translation
MEVANVNSRKNMGRKKIEIRKIEKKSSLEVTFSKRRTGLFKKAGELCVLCGAEAAAIVFSPGGRAFVFGH
PTADAVIDRFLGRDTDTSSRGVVPAEQVVHGQVQRQYLEAVERSEVKEEGGFWWDAPIENMGLNELEQFK
GSLEKLREKVADRVTVMTLMMVMESESGAGPSSTTMVEYAAPPQEYNSSAVLHARDLAADSHSQAVPQGF
DEPRF
>VvMADS55_chr10_arabidopsis_translation
MANINMVKKQSMGRQKIEIKKIEKKSSLEVTFSKRRTGLFKKAGELCVLCGAEAAVIVFSPGRRAFVFGH
PSADAVIDRFLHRETNSRALVPAGQVHGHVQRQYLEALGRLEVKKEQEETVGGDGEGGFWWDAPIENMGL
NELEQFRGSLEELRKKVADRVEEMTMMMMMESGPSSTAMVEYAAPPQEYNSSGGVLHGHDLAAQGVPHGF
DFGFGFDEHLF
>VvMADS56_chr3_arabidopsis_translation
MAPTRKSKGRQKVEMTKMTKESNLQVTFSKRRSGLFKKASELCTLCGAEIAIIVFSPGKKMYSFGHPGVE
SIIDRFLTGNPLPHSGALQLFEAHRSANVRDLNMQLTQVLNQLEGEKKRGEALTQMKKASQAQYWWAAPI
EELSFEQLELLKVSLENLKRNVEMHADKHMMEASNPLTFFLSSSVGAGVPYDAHIAAFDPLNFNFGYGGH
LH
>VvMADS58_chrUnrandom_arabidopsis_translation
MVKKHSMGRQKIEIKKIVKKSSLEVTFSKRRTGLFKKAGELCVLCGAEAAVIVFSPGRRAFVFGHPSADA
VIDRFLHRETNSRALVPAGQVHGHVQRQYLEALGRLEVKREQEETVGGDGEGGFWWDAPIENMGLNELEQ
FRGSLEELRKKVADRVEEMTMMMMMESGPSSTAMVEYAAPPQEYNSSGGVLHGHDLAAHGVPHGFDFGFG
FDEHLF
>VvMADS59_chr1_arabidopsis_translation
MATIRKSKGRQRVEMTKMAKESNLQVTFSKRRSGLFKKASELSTLCGAETAIIVFSPGKKVYSFGHPSVE
SIVDRFLTRNPLTNAGTLQLFEAHRSANIRELNMQLTQVLNELGAEKKRSEVLEKIKKASQTQCWWAAPI
EGLGFEQLELLKVSLEQLKANVARQADNLMFQAANPPDFFSPNSIGAIIPHDAKIIGFDPHGFNFGYGGS
LF
>VvMADS60_chr3_rice_translation
MATVRKSKGRQRVEMAKMTKESNLQVTFSKRRSGLFKKASELCTLCGVEIAIVVFSPGKKVYSFGHPCVE
SIIDRFLTRNPLPNSSALQLFEAHRSANVRDLNLQLTQVLNQLEIEKKRGEALTQMRKASQAQCWWAASI
EELSFERLELLKVSLENLKKNVALQVDKLMIEASNPPTFFPSNSVGAVVPYDSQVIVASIGPRSKVDQEG
GYLNREGKATG
>VvMADS61_chr3_rice_translation
MATVRKSKGRQKVEMTKMTKESNLQVTFSKRRSGLFKKASELCTLCGAETAIIVFSPGKKLYSFGHPCVE
SIIDRFLMRNPLPNSGALQLFEAHRTTNVRNLNVQLTQVVNQLEGEKKRGEALTQMWKACKPQCWWAAPI
EEFSLEQLELLKVSLEDLRRKVARQADELMIEAKNPPAFFPGNSVGTIMPYDAQMAGFDPYSHKYNFGYG
EGCRIYEFKDLPRFIQCKRCKKATQRENFDHYPTIGIVCGKIEEKPSP
>VvMADS65_chr10_rice_translation
MGRKKIEIKKIEKKKALEVTFSKRRTGLFKKVGDLCSLCGVEATVIVFSPAGRPFVFGHPSADSVIDRFV
HQEPHSSASMGCGKRQCLGAPEMLQVGGEREEAPAMGNREDGFWWAGGGQGNERGQRQCLGVPERPEVGR
EREEAAVIGDGKAGFWWDAPIENMGLSELERFKASIEEFREKVADRVEEMTMMMMEKNTCDVWDSNLKNS
ILVAVFPLRMGRYL
>VvMADS66_chr10_rice_translation
MGRKKIEIKKIEKKKALEVTFSKRRTGLFKKVGDLCSLCGVEATVIVFSPAGRPFVFGHPSADSVIDRFL
HQEPHSSAKNTCDVWDSNLKNSILVAVFPLRMGVPYTIRYGTVRTTVSIGIAKLTPEDTPVPA
>VvMADS68_chr4_arabidopsis_translation
MGRRKLSIRRLQSGRERQAKYSQRKQGILRKANDLAVLCDTDVLLLMFSPTGKPCLTVGQNKNLLTVMER
LASLSVDYREERAAYTLEMARQARKFQDFIFSFLLPQYFFSSLFPPFFLSLHNLLAKMHRRLNSDVDQKN
FSLDSNEILQLKRSELEQLRSQLAEKSKAMRDWKFPSTVNDLGQIRRMENSLSELMVRVRAKKGYAHPIK
YIMVK
>VvMADS69_chrUnrandom_rice_translation
MEKKQTKGLQKIEMKRIPKEEDRLITFSKRRFGIYNKASELSTLCGEKVGVLVFSRAGKAFSFGHPSIEI
ITNKVLYENPPPNDGDTLSGLKVVKEVKEALISNRTSYQHVGRQKRPLDD
>VvMADS70_chrUnrandom_rice_translation
MSSMGRSLGQREMKIEPIQDLEQRRIVFSKCKRGLFKKAAELSILCGADTAIVVFSPQGNIVHSFGSPSV
DSIINRFLSQNPRVNPQYLPHEASRHGATMVALRRELHRVENQLKAEKKREVLDVAHKKSDDYINGLSRD
ELLQLKGKLEALKRDVEARSKELQKETMILQGRMSFERQLSQTVEYVKGRTRVNVTPKFTLRAK
>VvMADS71_chr19_arabidopsis_translation
MEKKQAKSHKKVEMRKMNNEEDRLVSFSKRRSGIYRKASELSTLCGAEVGILAFSPNGKPFSFGHPCIKS
ITNKLLSENHTPCDGTQNLLEPYRRVRLNELHQNYKEACTQMKAAKEQEKKIKKKSLDRSKGWWEEPVIE
LDMDGLKRRADLIQKLHKHVQLQIKELQTMASSSTSPSDTQTVGHGRGPC
>VvMADS75_chr14_arabidopsis_translation
MTRKKVKLAYITNDSARKATFKKRKKGLMKKVSELSTLCGIDACAILYSPYDSQPEVWPSPLGVQRVLAH
FKKMPEMEQSKKMVNQESFLRQRIAKGNEQLKKQRKDNREKEITQVMYQSLTGKGLQNLNIVDLNDLGWM
IDQNLKDIHKRIESLNKEAQSQAAAAAAAAAGQLIKTGGKAQEEKPAFDSMDAIQRQQWFVDLVNPNEQM
GFAGDDMMLPFGDNNHNALWPNGFFP
>VvMADS76_chr5_arabidopsis_translation
MARKKVQLQWIMNDTTRRTTYKKRVKGLMKKAKELSILCGVEACAIVYSPYDPQPEVWPSPMEVVRVIGE
FECRPENDQTKKRLNQENYIRQRVAKAKEQVVKQQKKNRRMELDNLMYQCLAGGRGLQGLNIKELSDLMW
YIDDQLKPISHKMEYSHHPAPQPGGAVALTAVPVAQKTPLEVALESLENQILMDTAPQPRDGVVTVAHTE
GQDMMLPVPHDNYEDPSFWGAPFFP
>VvMADS77_chr8_arabidopsis_translation
MARKKVRLAWIASDSARRACFRKRRAGLLKKVMELSTLCGVEAAIVVFCPDDEPAFWPSKPAVEQLFRRY
EEIPVMERSKKMLSQENFLRERIAKISEQTSKCLKRVVEMEMNDLVYQIVNGNRMYELPISDLTNVMRFL
EEKNSEISKRAQHLHEFPPLSGNGTPSSSSLPPALISALERAAPSGGLDTEGRGAIDNPRRDKWITDKSL
VNNIAANGGWNEIGMQQYKDMLGLLHGISNIPMQPSSASNNIEFSQGNTHIPMAGEEMWLPYGNMGGSGT
GGIPMESLHGSTDLTINLMGPRYGFNIRTSSGGNQMGLPHRNADLVAGSEIAFPYGTGGGNIDFPVAANQ
MGLPDRSNGSLITGVNHHGNTDFLMAGNQMGLPYGINDSFAGGNEMGVPHGNSTGMTMVGSEAGLPTGNI
GSSTRGHQMGAVGLMLGNEMGPPYGNFGVGVPYGNNSTGAIVGNEMGQLPYGDVVGGGMELLHANVGPSR
ASYNGVNIMGLPRGNIANSSGGNDRGQLYDVNYQAWFDSLGV
>VvMADS78_chrUnrandom_arabidopsis_translation
MEVANVNSQKKNMGRRKIEIRKIEKKSFLEVTFSKCQTGLFKKVGKLCVLCGAEAVVIVFSLGGRAFVFD
HPIVKAVIDHFLKCDTDTSSCVVGHATRRSFL
>VvMADS79_chr8_arabidopsis_translation
GNTVAIEKLALARKKVRLAWITNDSARRACFRKRRAGLLKKVMELSNLCGVEAAMVIFCLDDELAFWPSK
PAVEQLFRRYEEIPVMERSKKMLNQENFLRERITKIR
>VvMADS80_chr17_arabidopsis_translation
MGRGKLKMELIANEKLRCRTFRNRQKGLKKKLQELSTLCDVEACMIMHCDQNGNGTYSSQPDVWPENHYE
VQRIVNKYMKEDHGKRTMDLSDILESRKRKAELELQKLREKNGETKGQTSETGLELDGLSYENLMEINDQ
LDRKLEHVMSLIDLKKGEAGLMSKTPVNSSHIPGLPIAEQAFQGIEMFLYDLDFPDTSSGVVESDLNPMM
MMNMENSGYPEFGSGKASSSELLHHNTQFQDPIHCDPAHGMFKNNTDPSTSYQKMGTVPTMQDMSVSKNT
MMFNTHPTNSMPQMGLSENMMFDMDHSIYSMQQISAYRQYLLDGYLFFHS
>VvMADS82_chr17_arabidopsis_translation
MGRGKLKMELIANEKLRCRTFRNRQKGLKKKLQELSTLCDVEACMIMYCDQNGNGSYSSQPDVWPENHYE
VQRIVNKYVKADHGKRAVDLSDILESRKRKAEVELQKLQEKNGETKGQTSETGLELDGLSYENLMEINDQ
LDRKLEHVMSLIDLKKGEAGLMSKTPVNSSHIPGLPTADEQAFEGIEMFLYDLDFPDTSSGVVESDLNPM
MMMNMENNGYQEFGSGKASSSELLHHSTQFQDPIHYDPAHGMFKNNPDPSTSYQKMGTVPPMQEMSVSKN
TMMFNTHPTNSMPQMGLSENTMFDMDHSISMQQISAYRQYLLDGYLFFHS
>VvMADS83_chrUnrandom_arabidopsis_translation
MGRGKLKMELIANEKLRCRTFRNRQKGLKKKLQELSTLCDVEACMIMYCDQNGNGSYSSQPDVWPENHYE
VQHIVNKYMKEDHGKRTVDLSDILESRKRKAEVELQKLQEKNGETKGQTSETGLELDGLSYENLMEINDQ
LDRKLEHVISLIDLKKGEAGLMSKTPVNSPHIPGLPTAEHAFQGIEMFLYDLDFPDTSGGVVESDLNPMM
MMNMENNGYPEFGSGKASSSELLHHSTQFQVPIHYDPAHGMFTNNPDPSTSYQKMGTDLTMQEMSVSKNT
MMFNTHPTNSMPQMGLSENMMFDMDHSISMQQISAYRQYLLDGYLFFHS
>VvMADS85_chr5_arabidopsis_translation
MARKKVQLQWIMDDTARRTTYKKRVKGLMKKVKELSILCGIEACAVVYSPYDPQPEVWPSPMEAVRVIGE
FKCRPENDQTKKRFNQENYIRQRVAKAKDQVVKQQKKNRRTEMENLMYQCQAGGKGLQDLNIKDSSDLMW
SIDDRLKAVGQKMEYFHHPAPQPSGAAAPAAVPVAQKTPLEVALESLENQMLMDLTPRPTDSLVTVGYCK
V
>VvMADS86_chr5_arabidopsis_translation
MARKKFKLQWIMNDTARRTTYKKRGTGLMKKVKELSILCGVEACTIVYSPYDPQPEVWPSPMEAVRVVGE
FKSRTENDQTKKGLKQENYTRQRVAKAKDQLVKQQKKNRRMEMENLMYQWLAGGNGFQT
>VvMADS87_chr5_arabidopsis_translation
MARKKVKLQWIMNDTARRTTYKKRVKSLMKKVMELSTLCGVEACAIVYSPYDPQPEVWASPMEAVRVIGE
FKCRPDQTKKRLDQEIYTRERVAKAKEQVVKQQKKNMRMEMQNLMDQCLAGVQGLQHLNIKELSDLTWSI
DDRLKAINHQMEFFHHPAPQPGATAAPVAVPVAQNTHLEVALESLENQILLDTAPMPRDSLFSVAYRGGQ
DMMLPGLYDHYEDPSFWGPPFFP
>VvMADS91_chr5_rice_translation
MARKKVQLQWIMNDTARRTTYKKRMKGLMKKVKELSILCGIEACAIVHSPYDPQPEVWPPPMETVRMIRE
FKCRPENDQSKKRLNQENYMRQRVAKAKDQLEKQQKKNRRIEMENLMYQCQAGEKGLQDMSIKDSSDLMW
SIDDQLKAVGQKMEYFHHQAPQPGGAAAQAAVPVAQKTPLEVALESLENQMLMDVAPRGPDSLVTVGYPG
SQDMMHPGPHGHYEDPSFWGPPFFT
>VvMADS93_chr15_arabidopsis_translation
MVGGKLKLELIANEKIRHRTFQNRQKGLRKKVHELSTLCGVEACMIICCPNGNGTYSSQPCVWPENHYEV
ERIINKYINERKKEHGKRTVDLSGVLESRKTRAEFELQKLQGKNGETKGQTSESGLELDGLSYEKLMEIV
NKLDKKLESVESLIDLKRGEAGLMSETLVNCPDHMPGLPTAEPIDIHVAMDDSAFQGSEMVLYDLDFPEL
SDGGVESDLTWTMMNLENNECPELGGGKTSSKQRIPTTWRWKGIQQRPPVPE
>VvMADS94_chr15_arabidopsis_translation
MMVGGKLKLELIANEKIRHRTFQNRQKGLRKKVHELSTLCGVEACMIICCPNGNGTYSSQPCVWPENHYE
VERIINKYINERKKENGKRTVDLSGVLESRKTRAEFELQKLQEKNGKTKGQTSETGLELDGLSYEKLMEI
VNKLDKKLESVESLIDLKRGEAGLMSETLANCPDHMPGLPTAEPIDIHVAMDDSAFQGSEMVLYDLDFPE
LSDGGVESDLTWTMMNLENNECPELGGGKKSSMIMLAL
>VvMADS95_chr5_arabidopsis_translation
MVGGKLKLELIGNEKIRHRTFQNRQKGLRKKVHELSTLCGVEACMIICCPNGNGTYSSQSCVWPENHYEV
ERIILKYINERKEEHGKRTVDLSGVLESRKTRAKFELQKLQEKNGETKGQTSETGLELDGLSYEKLMEIV
NKLDKKLESVESLIDLKRGEAGWMSETLVNCPDHMPGLPTAEPIDIHVAMDESAFQGSEMVWYDLDFPEL
SDGGVESDLTWTMMNLENNECPELGGGKTSSSELLYQSDPSTSYQKMGTVPTMQGTETIFYDLDFADLSN
GGVEFDLNWINMENNEYLQLGGGRASSSDLLYQSDPAHGMFQNTDPSTSYQNMGTVPTMQGMSVSENTMM
F
>VvMADS96_chrUnrandom_rice_translation
MARKKVKLQWIVNDTARKATYKKRVKGLMKKVKELSILCGVDACAITYSPYHQQPEVWPSPSEVERVLAD
FKSRPENDQTKKVLNQENFTWQRITKARDELGKQQKKNRKSEIEHLRTQCLSGKRLEGLDSRDLGDLMWA
IDDQLEAVKHRMSLVPVAQPQVAGAGGSSSSNAGIGGTITGIGGVGGVSGVVGADAPAYAAPPGTTDSVS
GIGALSDVGGGGVPGVVSLPFSSINGAGAGAALGSGAAGSAIGAAQKTSFELAIEALENQIFMEQNQQIQ
NENMVNVLGDQEMLPLDYDVSNFWRNPYIH
>VvMADS97_chr15_rice_translation
MGRSRLPLELIPKEKSRKITFQKRTMGLKKKTYEISTLCGVDACVIIYNWTSDDRPMEPIFWPSNPEEVK
SIINRYKEHSKEERGLKTLDLSGFFEERTKKIQKEISKLGHQGADQTKYPTWDDRLNDLSTDQLRELVNA
LGNKLEVIKSRVELLKMSQALLEGPASVNPSYPNNAMPSTQSLHVPYMGAIDSMPLVPNPMTPMMNPRMT
KVMMAMMTNDNTNSSQFSGPSNCTNNTQYTPPLQHPFYYDPTSGLLENIVYSNPGPSSCYYPPAMLPPIL
PYIPNQMITNVPQIARDYDMNELDVNDNKQALSAKRHLLNLISDQERGLKTLNNPSKRSEIVEAIDAMAV
LGQDTVTTVRVQEGEDFLVWKIERKGTFKDQSLGRPEFAAICL
>VvMADS99_chr15_rice_translation
MGLKKKTYEISTLCGVDACVIIYSWTSDDRPMEPIFWPSNPEEVKSIINRYKEHSKEERGLKTLDLSGFF
EERIKKIQKDISKLGHQGADQTKYSTWDDRLNDLSVDQLREFVNALGTKLEVIKSRVELLKMSQTLLEGP
ALENPSYPNNAMPSTQSLHVPYLGMIDSMSLVPNPMTPMMNPRMTKEETGGVAKIFPEEVIDRFSTEKAG
GRAGAWEWRLGFVNGKYCNQEDERELCRL
>VvMADS100_chrUnrandom_rice_translation
MSSMGRSLGQREMKIEPIQDLEQRRIVFSKCKRGLFKKAAELSILCGADTAIVVFSPQGNIVHSFGSPSV
DSIINRFLSQNPRVNPQYLPHEASRHGATMVALRRELHRVENQLKAEKKREVLDVAHKKSDDYINGLSRD
ELLQLKGKLEALKRDVEARSKELQKETMILQGRMSFERQLSQTVEYVKGRTRVNVTPKFTLRAK
>VvMADS106_chrUnrandom_rice_translation
MARKKVKLQWIVDNAARKATYKKRVKGLMKKVRDLSILCGVDACVITYSPYHPEPQVWPSPIEVEQVIAA
FRSRPENDQTKKVMNQENFTWQRIFKARDEVVKQQMKNRKKEIENLRIQCLGGRLLEGLESKDLPDLTWA
IDNQLEAVKNRTVLDPWPQVAADTRGSANNTGTGGESSRQAWISHGVLLLLFQFIFDLSV
>VvMADS110_chrUnrandom_arabidopsis_translation
MELVVNEKSRYRIFRNRQKGLKKKIHELSTLCDVNACMILYGPNAHGTESSQPDIWPENRNEVEGIIENY
RKERKKDHGKRTLDLSDVLQTKKKTDLELRELQEKNVKTKTGVDEFSYEQLMQIIDKLDKKHEAVQNMID
SKKGKARLMSETTVGCSNMQGLSAEKPFNIKVPMDCQGTGVVESDLGFMMNQMGMMKVENHQYAEFGAGR
ASSSDIQYNNVQYHDPIHLHPALGVSKNMVLNPDPRTPTHQMGVSKNMVFMVDVRIPMQHMPTFMQYPMM
STDLGTDSNF
>VvMADS111_chrUnrandom_rice_translation
MKKKRAKSHEKVEMRRMNNEEDHLVSFSKCRSGIYIKASELFTLYGTEVGILAFSPNEEPFSFGHPCIKL
NELHHNYKEACKQKKVAKEQEKKIKKKSLIKGWWEEPVIELDMDGLRRRADLIQKLHKHVQLQIKELQTM
ESCSTLPSDTQTVGHGHGRGPC
>VvMADS115_chr15_arabidopsis_translation
MELVVNEKSRYRIFRNRQKGLKKKIHALSTLCDVKACMILYGPNAHGTESSQPDIWPENRNEVEGIIENY
RKERKKDHGKRTLDLSDVLQTKKKTNLELREVQEKNVKTKTGVDEFSYEQLMEIIDKLDKKHEAVQNMID
SKKGKARLMSETTVGCSNIKVPVDCQGTGVVESDLGFMMNQMGMVVENHQYAELGATTTKIVYGVTIYGV
TFKIMTP
>VvMADS121_chr19_rice_translation
MEKNQTKGHQKIEMKKIPNEENHLITFLEHRSGSTKRQVSFLLCVAKVGTLVFSLVDKAFSFGHPSIETS
TNKVLYENPPPNDGTLNLVQAYRQFRFNKLHKKDSELLSKMEVPKEQEKILRKNVPNQSKCWWEEPISEL
EQMATKIQMLHNHVQHQANELRTRASSSSLPFSVVNQTPPTNSFSMTKEE
>VvMADS122_chr6_rice_translation
MVRDKLTMELIADKKSRFRTFRNREKGLKKKLDELSTVKACMMVNGPDGDGPSSSQSEFWPENPSEVECI
IEKYMKEVGRLGKEGIEFIGCSWSWKKTAALEPQKLQEEIANTKGRTLEGGVDEFSYAELIAIIGKLCKK
LEEVENIIEFKKGETNSMNEPTVHWSHMQGLSAIQPLDIHVPMQGIFLEYDLGFLDQGTGEVEYGLGFSD
KGTGTVEYANGLQGKLGKPAYLEDWITTITSLTAGESAFKVTFDWDEEIGEPGAFIIRNNHHSEFYLRTL
TLEDVPGPHIKIPTYPAEHYKTDRVFFTNQTYLPSETPGPLRKYREGELVNLRGDGTGELKEWDRVYDYA
YYNDLGNPDRDLKYTRPVLGGSAEYPYPRRGRTGRPPSEKDPNTESILPLLMSLNIYVPRDERFGHLKML
DFLAYALKSIVQFLLPEFEALCDSTPNEFDSFQDVLDLYEGGIKVPEGTLLDKIKDNIPLEMLKELVRTD
GEHLFKFPMPQVIKEDKSAWRTDEEFAREMLAGLNPVVIRLLQEFPPKSKLDLEVYGNQNSSITKEHIEN
HLDGLTINKSYDEHTNWGDNSRSEDMIERVVRNSNMVGEMIGLMIHNQENMVSKTVRDRHQLDSIQNLDK
QCYCY
>VvPI_translation
MRAALLLIHLPPAPLSPPQPIAAKLSALIVPPCLHLPRLTFSSLTSRPLSNPRNKNPFIARADEGDADSG
GPDDYDMDEEEVEEVDNKKDYDVEYDPLAAAAAAASVSDDIAMVQSKSFVSIQGWDSEMVVDYRINEDEF
HKISLFDCDFFIRKPPDPDNDVYDFREMYVTPPDTDVYAIPRVLAPMPQKYIRCAKSDYGCYDVTEPPID
APRDPLYKSEREVWKVFLTKHYRNRRLADPEFVLDFEEIYVIDSKTKSITRAKVVVTAPGGRNRDRKSDL
LVIRDKGNSFKIIHASEKDDPTTVIEREEWTKSREDMERHLRKLRDFSISNWKRRKKRKREEEGLVWREM
GRGKIEIKRIENSSNRQVTYSKRRNGIMKKAKEITVLCDAHVSLVIFASSGKMHEYCSPSTTHLKGEDIS
SLHHKELMAIEDALEIGLASQRILEEENKHLNYIVHHQGMPMEAGNVREVESGYHQRAVRDYNPQMPFAF
RVQPIQPNLQERI
>VvSEP1_translation
MGRGRVELKRIENKINRQVTFAKRRNGLLKKAYELSVLCDAEVALIIFSTRGKLYEFCSSSSMLKTLERY
QKCSYGAVEVSRPSKELESSYREYLKLKSKFESLQRTQRNLLGEDLGPLNTKELEQLERQLETSLKQVRS
TKTQFMLDQLSDLQNKEQVLVESNKALTRKLDEISVKNHLQLSWESGEQSMPYGHQQAQSQGFFQPLECN
PTLQIGYNPAGSSQLSAPSNAQNVNGFIPGWML
>VvSEP2_translation
MGRGRVELKRIENKINRQVTFAKRRNGLLKKAYELSVLCDAEVALIVFSSRGKLYEFCSGPSMAKTLEKY
QKCSYGALEASQPVYELTQSSYQEYLKLKTRVEVLQRSQRHLLGEDLDPLNTKELEQLEHQLEMSLKQIR
STKTQNMLDQLADLQNKEHMLIEANNALRRKLEESNGKHPLQQSWEAAGNSALYSRLPAQSEGFFQPLER
NSTLEMGYNAAGSNEITLAAPSQNDNGFGPGWMLWI
>VvSEP3_translation
MGRGRVELKRIENKINRQVTFAKRRNGLLKKAYELSVLCDAEVALIIFSNRGKLYEFCSSSSMLKTLERY
QKCNYGAPETNVSTREALELSSQQEYLKLKARYEALQRSQRNLLGEDLGPLSTKELESLERQLDVSLKQI
RSTRTQYMLDQLTDLQRKEHMLNEANKTLKQRLLEGTQVNQLQWNPNAQDVGYGRQQAQPQGDGFFHPLE
CEPTLQIGYQPDPITVAAAGPSVNNYMPGWLP
>VvSEP4_translation
MGRGKVELKRIENKINRQVTFAKRRNGLLKKAYELSVLCDAEVALIIFSNRGKLYEFCSGSSMPETLERY
QRCSYSALEASQPAKETQNSYQEYLKLKSKVEVLQRTQRNFLGEDLGHLGTKELEQLEHQLDKSLKQIRS
TKTQFMLDQLSDLQRKEQILMEANNALRRKLGESSAESGLGSTWEAAAHNLPYNREPVQSEDFFEPLQCD
STLQIGYNPVLRVEMNGASTTQNVNGFIPGWMV
>VvSOC1_1_translation
MVRGKTQMRRIENATSRQVTFSKRRNGLFKKAFELSVLCDAEVALIIFSPRGKLYEFSSSSMQETIERYQ
RHTKDVHTNNYKTTEHNMQHLKHEAANMAKKIELLEISKRKLLGEGLGSCSIEELQQIEQQLERSVSSIR
ARKNQVFKEQIEQLKEKEKALAAENAMLCEKCGVQPYQAPNQENETLPSAERSQNSDVSTDLFIGLPEGR
AKRLLLGN
>VvSOC1_2_translation
MVRGKIQMRRIENATSRQVTFSKRRNGLLKKAYELSVLCDAEVAVIIFSQKGRLYEFSSSNMQSAIERYR
EHAKQVETNNPELEQYMQNLKQDAESMAKKIELLEVSQRKLLGQGLSSCSLDEILEIDSQLEKSLKSIRA
RKAQIFQEQIEELKEREKQLLEENARLSQKVNLFLSLNFSSVAVSLICNFFMDS
>VvSOC1_3_translation
MVRGKTQMKRIENAASRQVTFSKRRSGLLKKAFELSVLCDAEVALIIFSPRGKVFEFSSSSINKTIERYQ
SKAKGLGISKRGAPENEQHHLEGETVDLAKKIELLEVSKRRLLGECLDSCSIEELQQIENELEQSLSNIR
IQKNHLCKGHIERLKEQERILGEENAKLRGKCGLQPLQPSTKHQSVPYVEISEVETELFIGPPERRTVRY
LSET
>VvSVP1_translation
MAREKIQIKKIDNATARQVTFSKRRRGLFKKAEELSVLCDADVALIIFSSTGKLFEFSSSSMKEILEKHS
LQSKNLEKLEQPSLELQGERIMKEITDLQSKVVEISNRRRQVAGDSENMFHEEGQSSESVTNVSNSNGPP
QDYESSDTSLKLGLPYSG
>VvSVP2_translation
MAREKIKIRKIDNVSARQVTFSKRRRGLFKKAEELSVLCDAEVALIIFSSTGKLFDYSSSSMKDILGRYT
MHSNNLEKLEGPSLELQLENSNHVRLSKEIADKSHQLRQMRGEDIQGLNIEELLKLEKMLEAGLSRVLKS
KSDRIMTEIATLQTKGAQLMEENNKLRQKMEIICKGKRLMTMESDNMILEEGQSSESITNVYSCSSGPPQ
EDDSSDTSLKLG
>VvSVP3_translation
MARQKIQIKKIDNTAARQVTFSKRRRGLFKKAQELSILCDAEIALIVFSAAGKLFEYSSSSVSQVIGRHN
QHPQTPGKPEPPSLELQLENSTCAALSKEIAQQTQRLRQMKGEELQVLKIEELTELEELLEAGLCNVVEE
KEERIRTEISDLQRKGDLLQEENERLRKEVRTLTIPSFCFLFFVFCASCLQEC
>VvSVP4_translation
MARQKIQIKKIDNTAARQVTFSKRRRGLFKKAQELSTLCDAEIALIVFSAAGKLFEYSSSSVSQVIERHN
QHPQTPEKPEPPSLELQLENSTCAALSKEIAQQTQRLRQMKGEELQGLKIEELIELEELLEAGLCSVVEE
KAERIRTEISDLQRKGDLLREENERLRKEVENISEAPLLQQGHSSESITTNICSLSDPNQGLHNSDTSLK
LGVEKLQSNWEGPYVVTKAEDLGAYHIQTLNKVSLLRPWNVTNLKQYYQ
>VvSVP5_translation
MPRQKIQIKKIDNTAARQVTFSKRRRGLFKKALELSTLCDAEIELIVFSAAGKLFEYSSSSVNQVIERHS
QHPQTPEKPEPPSLELQLENRTCAALSKEIAQQTQRLRQMRGEELQGLKIEELIELEKLLEAGLCSVVEE
KAERIQTEISDLQRKGDLLRGENERLRKWMENISEAQPLLQQGHSSESITNNICSLSDPNQGHHNSDTSL
KLGIRKEAMDFLSYVSEVTRGWDEPNSKELGRMKAPVNPKGGMYMLSEDMDIKAKVATIARRLEELELKK
MHEVQAISETQAHAMPCTICQSCDHVVDECPTMPAVREMLGDQANVVGQFRLNNNAPYGNTYNSSWRNHP
NFFWKPRPPPYQPQAQTQAPQQTSSVEQAIDNLSKVMNDFVGEQRAINSQLHQKIENVESSLNKRMDGMQ
NDLYQKIDNIQYSISRLTNLNTGDSSKLREVKAVITLRSGKEVDQPLPKVRQDEELLSKKTLVKESNNQE
EEIPTYAKFLKDLCMVKRGLHVTKNAFLTEQEVCLINTLVEEHCDKSLEESLNESLEVFEEGLPEPSDVL
AIMSPWRRREEILPLFNKEDSQGAAMEDPPKLVLKPLPVNLKYAYLEEDEKCPVVVSSNLTSDQEDSLLG
VLRKCKKAIGWQISDLKRGLKHKKLKEVEG
>VvTM8_translation
MGRGKVELKRIENSTSRQVTFSKRKNGLLKKAFELSILCDAEVALLIFSPSGKAYQFASHDMDRSIARYR
NEVGLMEFNNYQRSRTIEFWMSEIDNLRRTIDTLEAKHKHLAGEDLSTLGMKELKQLERQLKNGVERIRA
KKRRIISEHISLLKKRQRALQEDNTRLQKKVRCSELPSYIYIYIKIYSLLINSILKSAFICTMRLSCTRP
T
