# Supplementary material for: Comparative genomics of flowering behavior in Cannabis sativa
Source: Front Plant Sci. 2023 Jul 27;14:1227898. doi: 10.3389/fpls.2023.1227898 (PMC10421669; doi:10.3389/fpls.2023.1227898)
Supplement: Supplementary Table 3 — RNA Seq data accessions. [file Table_3.xlsx]

## Sheet: RNASeq Samples
Genbank SRA Accession	Tissue	Stage	Sex	Replicate	Cultivar	Reference
SRR10600874	Flower	2. Beginning to mature bud	Female	4	CannBio	Braich et al., (2019)
SRR10600875	Flower	2. Beginning to mature bud	Female	3	CannBio	Braich et al., (2019)
SRR10600876	Leaf	3. Fully formed (Male)	Male	1	CannBio (Male)	Braich et al., (2019)
SRR10600877	Flower	2. Beginning to mature bud	Female	2	CannBio	Braich et al., (2019)
SRR10600878	Flower	7. Mature flower (Male)	Male	6	CannBio (Male)	Braich et al., (2019)
SRR10600879	Flower	7. Mature flower (Male)	Male	5	CannBio (Male)	Braich et al., (2019)
SRR10600880	Flower	7. Mature flower (Male)	Male	4	CannBio (Male)	Braich et al., (2019)
SRR10600881	Flower	7. Mature flower (Male)	Male	3	CannBio (Male)	Braich et al., (2019)
SRR10600882	Flower	7. Mature flower (Male)	Male	2	CannBio (Male)	Braich et al., (2019)
SRR10600883	Flower	7. Mature flower (Male)	Male	1	CannBio (Male)	Braich et al., (2019)
SRR10600884	Root	2. Tip	Female	1	CannBio	Braich et al., (2019)
SRR10600885	Root	1. Mid	Female	1	CannBio	Braich et al., (2019)
SRR10600886	Flower	7. Mature	Female	1	CannBio	Braich et al., (2019)
SRR10600887	Leaf	1. Vegetative	Female	1	CannBio	Braich et al., (2019)
SRR10600888	Flower	2. Beginning to mature bud	Female	1	CannBio	Braich et al., (2019)
SRR10600889	Flower	6. Maturing reproductive flower	Female	1	CannBio	Braich et al., (2019)
SRR10600890	Leaf	2. Maturing reproductive	Female	1	CannBio	Braich et al., (2019)
SRR10600891	Flower	1. Immature reproductive bud	Female	1	CannBio	Braich et al., (2019)
SRR10600892	Leaf	2. Immature reproductive	Female	1	CannBio	Braich et al., (2019)
SRR10600893	Flower	7. Mature reproductive flower	Female	1	CannBio	Braich et al., (2019)
SRR10600894	Flower	5. Immature reproductive flower	Female	1	CannBio	Braich et al., (2019)
SRR10600895	Leaf	3. Mature reproductive	Female	1	CannBio	Braich et al., (2019)
SRR10600896	Flower	4. Dried bud	Female	1	CannBio	Braich et al., (2019)
SRR10600897	Leaf	1. Mature vegetative	Female	2	CannBio	Braich et al., (2019)
SRR10600898	Leaf	1. Mature vegetative	Female	1	CannBio	Braich et al., (2019)
SRR10600899	Flower	1. Immature bud	Female	6	CannBio	Braich et al., (2019)
SRR10600900	Leaf	1. Vegetative cutting	Female	2	CannBio	Braich et al., (2019)
SRR10600901	Leaf	1. Vegetative cutting	Female	1	CannBio	Braich et al., (2019)
SRR10600902	Trichome	4. Mature bud	Female	6	CannBio	Braich et al., (2019)
SRR10600903	Trichome	4. Mature bud	Female	5	CannBio	Braich et al., (2019)
SRR10600904	Trichome	4. Mature bud	Female	4	CannBio	Braich et al., (2019)
SRR10600905	Trichome	4. Mature bud	Female	3	CannBio	Braich et al., (2019)
SRR10600906	Trichome	4. Mature bud	Female	2	CannBio	Braich et al., (2019)
SRR10600907	Trichome	4. Mature bud	Female	1	CannBio	Braich et al., (2019)
SRR10600908	Trichome	3. Almost mature bud	Female	6	CannBio	Braich et al., (2019)
SRR10600909	Trichome	3. Almost mature bud	Female	5	CannBio	Braich et al., (2019)
SRR10600910	Flower	1. Immature bud	Female	5	CannBio	Braich et al., (2019)
SRR10600911	Trichome	3. Almost mature bud	Female	4	CannBio	Braich et al., (2019)
SRR10600912	Trichome	3. Almost mature bud	Female	3	CannBio	Braich et al., (2019)
SRR10600913	Trichome	3. Almost mature bud	Female	2	CannBio	Braich et al., (2019)
SRR10600914	Trichome	3. Almost mature bud	Female	1	CannBio	Braich et al., (2019)
SRR10600915	Trichome	2. Beginning to mature bud	Female	6	CannBio	Braich et al., (2019)
SRR10600916	Trichome	2. Beginning to mature bud	Female	5	CannBio	Braich et al., (2019)
SRR10600917	Trichome	2. Beginning to mature bud	Female	4	CannBio	Braich et al., (2019)
SRR10600918	Trichome	2. Beginning to mature bud	Female	3	CannBio	Braich et al., (2019)
SRR10600919	Trichome	2. Beginning to mature bud	Female	2	CannBio	Braich et al., (2019)
SRR10600920	Trichome	2. Beginning to mature bud	Female	1	CannBio	Braich et al., (2019)
SRR10600921	Flower	1. Immature bud	Female	4	CannBio	Braich et al., (2019)
SRR10600922	Trichome	1. Immature bud	Female	6	CannBio	Braich et al., (2019)
SRR10600923	Trichome	1. Immature bud	Female	5	CannBio	Braich et al., (2019)
SRR10600924	Trichome	1. Immature bud	Female	4	CannBio	Braich et al., (2019)
SRR10600925	Trichome	1. Immature bud	Female	3	CannBio	Braich et al., (2019)
SRR10600926	Trichome	1. Immature bud	Female	2	CannBio	Braich et al., (2019)
SRR10600927	Trichome	1. Immature bud	Female	1	CannBio	Braich et al., (2019)
SRR10600928	Flower	4. Mature bud	Female	6	CannBio	Braich et al., (2019)
SRR10600929	Flower	4. Mature bud	Female	5	CannBio	Braich et al., (2019)
SRR10600930	Flower	4. Mature bud	Female	4	CannBio	Braich et al., (2019)
SRR10600931	Flower	4. Mature bud	Female	3	CannBio	Braich et al., (2019)
SRR10600932	Flower	1. Immature bud	Female	3	CannBio	Braich et al., (2019)
SRR10600933	Flower	4. Mature bud	Female	2	CannBio	Braich et al., (2019)
SRR10600934	Flower	4. Mature bud	Female	1	CannBio	Braich et al., (2019)
SRR10600935	Flower	3. Almost mature bud	Female	6	CannBio	Braich et al., (2019)
SRR10600936	Flower	3. Almost mature bud	Female	5	CannBio	Braich et al., (2019)
SRR10600937	Flower	3. Almost mature bud	Female	4	CannBio	Braich et al., (2019)
SRR10600938	Flower	3. Almost mature bud	Female	3	CannBio	Braich et al., (2019)
SRR10600939	Flower	3. Almost mature bud	Female	2	CannBio	Braich et al., (2019)
SRR10600940	Flower	3. Almost mature bud	Female	1	CannBio	Braich et al., (2019)
SRR10600941	Flower	2. Beginning to mature bud	Female	6	CannBio	Braich et al., (2019)
SRR10600942	Flower	2. Beginning to mature bud	Female	5	CannBio	Braich et al., (2019)
SRR10600943	Flower	1. Immature bud	Female	2	CannBio	Braich et al., (2019)
SRR10600944	Flower	1. Immature bud	Female	1	CannBio	Braich et al., (2019)
SRR12831863	Flower	4. Buds (Induced male)	Induced male	1	MS-17-338	Adal et al., (2021)
SRR12831864	Flower	4. Buds (Induced male)	Induced male	2	MS-17-338	Adal et al., (2021)
SRR12831865	Flower	4. Buds (Induced male)	Induced male	3	MS-17-338	Adal et al., (2021)
SRR12831866	Shoot	Apical tissue (Induced male)	Induced male	2	MS-17-338	Adal et al., (2021)
SRR12831867	Shoot	Apical tissue (Induced male)	Induced male	1	MS-17-338	Adal et al., (2021)
SRR12831868	Flower	7. Mature	Female	1	MS-17-338	Adal et al., (2021)
SRR12831869	Flower	4. Buds	Female	1	MS-17-338	Adal et al., (2021)
SRR12831870	Flower	4. Buds	Female	2	MS-17-338	Adal et al., (2021)
SRR12831871	Flower	4. Buds (Male)	Male	2	MS-17-338	Adal et al., (2021)
SRR12831872	Flower	4. Buds (Male)	Male	1	MS-17-338	Adal et al., (2021)
SRR12831873	Shoot	Apical tissue (Male)	Male	2	MS-17-338	Adal et al., (2021)
SRR12831874	Shoot	Apical tissue (Male)	Male	1	MS-17-338	Adal et al., (2021)
SRR12831875	Flower	4. Buds (Induced male)	Induced male	4	MS-17-338	Adal et al., (2021)
SRR12831876	Flower	4. Buds	Female	3	MS-17-338	Adal et al., (2021)
SRR12831877	Shoot	Apical tissue	Female	1	MS-17-338	Adal et al., (2021)
SRR15530045	Flower	7. Mature (Male)	Male	1	Feral Knox	Busta et al. (2021)
SRR15530046	Flower	7. Mature	Female	1	Feral Madison	Busta et al. (2021)
SRR15530047	Flower	7. Mature (Male)	Male	1	Feral Merick	Busta et al. (2021)
SRR15530048	Flower	7. Mature	Female	1	Feral Merick	Busta et al. (2021)
SRR15530049	Flower	7. Mature	Female	1	Feral Knox	Busta et al. (2021)
SRR15530050	Flower	7. Mature (Male)	Male	1	Feral Madison	Busta et al. (2021)
SRR192369	Flower	4. Buds	Female	1	Finola	Michigan State University (2011), unpublished
SRR192370	Flower	7. Mature	Female	1	Finola	Michigan State University (2011), unpublished
SRR192371	Leaf	4. Mature and immature	Female	1	Finola	Michigan State University (2011), unpublished
SRR192372	Root	3. Entire	Female	1	Finola	Michigan State University (2011), unpublished
SRR192373	Stem	Primary	Female	1	Finola	Michigan State University (2011), unpublished
SRR306861	Root	3. Entire	Female	2	Finola	Michigan State University (2011), unpublished
SRR306862	Root	3. Entire	Female	3	Finola	Michigan State University (2011), unpublished
SRR306863	Root	3. Entire	Female	1	Finola	Michigan State University (2011), unpublished
SRR306864	Leaf	0. Stem petiole	Female	1	Finola	Michigan State University (2011), unpublished
SRR306865	Leaf	0. Stem petiole	Female	2	Finola	Michigan State University (2011), unpublished
SRR306866	Flower	4. Buds	Female	1	Finola	Michigan State University (2011), unpublished
SRR306867	Flower	4. Buds	Female	2	Finola	Michigan State University (2011), unpublished
SRR306868	Flower	7. Mature	Female	1	Finola	Michigan State University (2011), unpublished
SRR306869	Flower	7. Mature	Female	2	Finola	Michigan State University (2011), unpublished
SRR306870	Flower	7. Mature	Female	3	Finola	Michigan State University (2011), unpublished
SRR306871	Leaf	1. <25% expanded	Female	1	Finola	Michigan State University (2011), unpublished
SRR306872	Leaf	1. <25% expanded	Female	2	Finola	Michigan State University (2011), unpublished
SRR306874	Leaf	1. <25% expanded	Female	3	Finola	Michigan State University (2011), unpublished
SRR306875	Leaf	3. Mature	Female	1	Finola	Michigan State University (2011), unpublished
SRR306877	Stem	Primary	Female	1	Finola	Michigan State University (2011), unpublished
SRR306884	Flower	4. Buds	Female	1	Finola	Michigan State University (2011), unpublished
SRR306885	Leaf	3. Mature	Female	2	Finola	Michigan State University (2011), unpublished
SRR306886	Leaf	3. Mature	Female	3	Finola	Michigan State University (2011), unpublished
SRR351932	Flower	6. Mid stage	Female	1	Finola	Michigan State University (2011), unpublished
SRR351933	Flower	6. Mid stage	Female	2	Finola	Michigan State University (2011), unpublished
SRR3996292	Hypocotl	06 days	Female	1	cv. Santhica 27	Behr et al. (2016)
SRR3996293	Hypocotl	06 days	Female	2	cv. Santhica 27	Behr et al. (2016)
SRR3996294	Hypocotl	06 days	Female	3	cv. Santhica 27	Behr et al. (2016)
SRR3996295	Hypocotl	06 days	Female	4	cv. Santhica 27	Behr et al. (2016)
SRR3996296	Hypocotl	06 days	Female	5	cv. Santhica 27	Behr et al. (2016)
SRR3996297	Hypocotl	06 days	Female	6	cv. Santhica 27	Behr et al. (2016)
SRR3996298	Hypocotl	06 days	Female	7	cv. Santhica 27	Behr et al. (2016)
SRR3996299	Hypocotl	06 days	Female	8	cv. Santhica 27	Behr et al. (2016)
SRR3996300	Hypocotl	06 days	Female	9	cv. Santhica 27	Behr et al. (2016)
SRR3996301	Hypocotl	06 days	Female	10	cv. Santhica 27	Behr et al. (2016)
SRR3996302	Hypocotl	06 days	Female	11	cv. Santhica 27	Behr et al. (2016)
SRR3996303	Hypocotl	06 days	Female	12	cv. Santhica 27	Behr et al. (2016)
SRR3996304	Hypocotl	06 days	Female	13	cv. Santhica 27	Behr et al. (2016)
SRR3996305	Hypocotl	06 days	Female	14	cv. Santhica 27	Behr et al. (2016)
SRR3996306	Hypocotl	06 days	Female	15	cv. Santhica 27	Behr et al. (2016)
SRR3996307	Hypocotl	06 days	Female	16	cv. Santhica 27	Behr et al. (2016)
SRR3996308	Hypocotl	06 days	Female	17	cv. Santhica 27	Behr et al. (2016)
SRR3996309	Hypocotl	06 days	Female	18	cv. Santhica 27	Behr et al. (2016)
SRR3996310	Hypocotl	09 days	Female	1	cv. Santhica 27	Behr et al. (2016)
SRR3996311	Hypocotl	09 days	Female	2	cv. Santhica 27	Behr et al. (2016)
SRR3996312	Hypocotl	09 days	Female	3	cv. Santhica 27	Behr et al. (2016)
SRR3996313	Hypocotl	09 days	Female	4	cv. Santhica 27	Behr et al. (2016)
SRR3996314	Hypocotl	09 days	Female	5	cv. Santhica 27	Behr et al. (2016)
SRR3996315	Hypocotl	09 days	Female	6	cv. Santhica 27	Behr et al. (2016)
SRR3996316	Hypocotl	09 days	Female	7	cv. Santhica 27	Behr et al. (2016)
SRR3996317	Hypocotl	09 days	Female	8	cv. Santhica 27	Behr et al. (2016)
SRR3996318	Hypocotl	09 days	Female	9	cv. Santhica 27	Behr et al. (2016)
SRR3996319	Hypocotl	09 days	Female	10	cv. Santhica 27	Behr et al. (2016)
SRR3996320	Hypocotl	09 days	Female	11	cv. Santhica 27	Behr et al. (2016)
SRR3996321	Hypocotl	09 days	Female	12	cv. Santhica 27	Behr et al. (2016)
SRR3996322	Hypocotl	09 days	Female	13	cv. Santhica 27	Behr et al. (2016)
SRR3996323	Hypocotl	09 days	Female	14	cv. Santhica 27	Behr et al. (2016)
SRR3996324	Hypocotl	09 days	Female	15	cv. Santhica 27	Behr et al. (2016)
SRR3996325	Hypocotl	09 days	Female	16	cv. Santhica 27	Behr et al. (2016)
SRR3996326	Hypocotl	09 days	Female	17	cv. Santhica 27	Behr et al. (2016)
SRR3996327	Hypocotl	09 days	Female	18	cv. Santhica 27	Behr et al. (2016)
SRR3996328	Hypocotl	15 days	Female	1	cv. Santhica 27	Behr et al. (2016)
SRR3996329	Hypocotl	15 days	Female	2	cv. Santhica 27	Behr et al. (2016)
SRR3996330	Hypocotl	15 days	Female	3	cv. Santhica 27	Behr et al. (2016)
SRR3996331	Hypocotl	15 days	Female	4	cv. Santhica 27	Behr et al. (2016)
SRR3996332	Hypocotl	15 days	Female	5	cv. Santhica 27	Behr et al. (2016)
SRR3996333	Hypocotl	15 days	Female	6	cv. Santhica 27	Behr et al. (2016)
SRR3996334	Hypocotl	15 days	Female	7	cv. Santhica 27	Behr et al. (2016)
SRR3996335	Hypocotl	15 days	Female	8	cv. Santhica 27	Behr et al. (2016)
SRR3996336	Hypocotl	15 days	Female	9	cv. Santhica 27	Behr et al. (2016)
SRR3996337	Hypocotl	15 days	Female	10	cv. Santhica 27	Behr et al. (2016)
SRR3996338	Hypocotl	15 days	Female	11	cv. Santhica 27	Behr et al. (2016)
SRR3996339	Hypocotl	15 days	Female	12	cv. Santhica 27	Behr et al. (2016)
SRR3996340	Hypocotl	15 days	Female	13	cv. Santhica 27	Behr et al. (2016)
SRR3996341	Hypocotl	15 days	Female	14	cv. Santhica 27	Behr et al. (2016)
SRR3996342	Hypocotl	15 days	Female	15	cv. Santhica 27	Behr et al. (2016)
SRR3996343	Hypocotl	15 days	Female	16	cv. Santhica 27	Behr et al. (2016)
SRR3996344	Hypocotl	15 days	Female	17	cv. Santhica 27	Behr et al. (2016)
SRR3996345	Hypocotl	15 days	Female	18	cv. Santhica 27	Behr et al. (2016)
SRR3996346	Hypocotl	20 days	Female	1	cv. Santhica 27	Behr et al. (2016)
SRR3996347	Hypocotl	20 days	Female	2	cv. Santhica 27	Behr et al. (2016)
SRR3996348	Hypocotl	20 days	Female	3	cv. Santhica 27	Behr et al. (2016)
SRR3996349	Hypocotl	20 days	Female	4	cv. Santhica 27	Behr et al. (2016)
SRR3996350	Hypocotl	20 days	Female	5	cv. Santhica 27	Behr et al. (2016)
SRR3996351	Hypocotl	20 days	Female	6	cv. Santhica 27	Behr et al. (2016)
SRR3996352	Hypocotl	20 days	Female	7	cv. Santhica 27	Behr et al. (2016)
SRR3996353	Hypocotl	20 days	Female	8	cv. Santhica 27	Behr et al. (2016)
SRR3996354	Hypocotl	20 days	Female	9	cv. Santhica 27	Behr et al. (2016)
SRR3996355	Hypocotl	20 days	Female	10	cv. Santhica 27	Behr et al. (2016)
SRR3996356	Hypocotl	20 days	Female	11	cv. Santhica 27	Behr et al. (2016)
SRR3996357	Hypocotl	20 days	Female	12	cv. Santhica 27	Behr et al. (2016)
SRR3996358	Hypocotl	20 days	Female	13	cv. Santhica 27	Behr et al. (2016)
SRR3996359	Hypocotl	20 days	Female	14	cv. Santhica 27	Behr et al. (2016)
SRR3996360	Hypocotl	20 days	Female	15	cv. Santhica 27	Behr et al. (2016)
SRR3996361	Hypocotl	20 days	Female	16	cv. Santhica 27	Behr et al. (2016)
SRR3996362	Hypocotl	20 days	Female	17	cv. Santhica 27	Behr et al. (2016)
SRR3996363	Hypocotl	20 days	Female	18	cv. Santhica 27	Behr et al. (2016)
SRR5209949	Bast Fibres TOP	06 days	Female	1	cv. Santhica 27	Behr et al. (2016)
SRR5209950	Bast Fibres TOP	06 days	Female	2	cv. Santhica 27	Behr et al. (2016)
SRR5209951	Bast Fibres TOP	06 days	Female	3	cv. Santhica 27	Behr et al. (2016)
SRR5209952	Bast Fibres TOP	06 days	Female	4	cv. Santhica 27	Behr et al. (2016)
SRR5209953	Bast Fibres TOP	06 days	Female	5	cv. Santhica 27	Behr et al. (2016)
SRR5209954	Bast Fibres TOP	09 days	Female	1	cv. Santhica 27	Behr et al. (2016)
SRR5209955	Bast Fibres TOP	09 days	Female	2	cv. Santhica 27	Behr et al. (2016)
SRR5209956	Bast Fibres TOP	09 days	Female	3	cv. Santhica 27	Behr et al. (2016)
SRR5209957	Bast Fibres TOP	09 days	Female	4	cv. Santhica 27	Behr et al. (2016)
SRR5209958	Bast Fibres TOP	09 days	Female	5	cv. Santhica 27	Behr et al. (2016)
SRR5209959	Bast Fibres TOP	15 days	Female	1	cv. Santhica 27	Behr et al. (2016)
SRR5209960	Bast Fibres TOP	15 days	Female	2	cv. Santhica 27	Behr et al. (2016)
SRR5209961	Bast Fibres TOP	15 days	Female	3	cv. Santhica 27	Behr et al. (2016)
SRR5209962	Bast Fibres TOP	15 days	Female	4	cv. Santhica 27	Behr et al. (2016)
SRR5209963	Bast Fibres TOP	15 days	Female	5	cv. Santhica 27	Behr et al. (2016)
SRR5209964	Bast Fibres TOP	20 days	Female	1	cv. Santhica 27	Behr et al. (2016)
SRR5209965	Bast Fibres TOP	20 days	Female	2	cv. Santhica 27	Behr et al. (2016)
SRR5209966	Bast Fibres TOP	20 days	Female	3	cv. Santhica 27	Behr et al. (2016)
SRR5209967	Bast Fibres TOP	20 days	Female	4	cv. Santhica 27	Behr et al. (2016)
SRR5209968	Bast Fibres TOP	20 days	Female	5	cv. Santhica 27	Behr et al. (2016)
SRR5209969	Bast Fibres MID	06 days	Female	1	cv. Santhica 27	Behr et al. (2016)
SRR5209970	Bast Fibres MID	06 days	Female	2	cv. Santhica 27	Behr et al. (2016)
SRR5209971	Bast Fibres MID	06 days	Female	3	cv. Santhica 27	Behr et al. (2016)
SRR5209972	Bast Fibres MID	06 days	Female	4	cv. Santhica 27	Behr et al. (2016)
SRR5209973	Bast Fibres MID	06 days	Female	5	cv. Santhica 27	Behr et al. (2016)
SRR5209974	Bast Fibres MID	09 days	Female	1	cv. Santhica 27	Behr et al. (2016)
SRR5209975	Bast Fibres MID	09 days	Female	2	cv. Santhica 27	Behr et al. (2016)
SRR5209976	Bast Fibres MID	09 days	Female	3	cv. Santhica 27	Behr et al. (2016)
SRR5209977	Bast Fibres MID	09 days	Female	4	cv. Santhica 27	Behr et al. (2016)
SRR5209978	Bast Fibres MID	09 days	Female	5	cv. Santhica 27	Behr et al. (2016)
SRR5209979	Bast Fibres MID	15 days	Female	1	cv. Santhica 27	Behr et al. (2016)
SRR5209980	Bast Fibres MID	15 days	Female	2	cv. Santhica 27	Behr et al. (2016)
SRR5209981	Bast Fibres MID	15 days	Female	3	cv. Santhica 27	Behr et al. (2016)
SRR5209982	Bast Fibres MID	15 days	Female	4	cv. Santhica 27	Behr et al. (2016)
SRR5209983	Bast Fibres MID	15 days	Female	5	cv. Santhica 27	Behr et al. (2016)
SRR5209984	Bast Fibres MID	20 days	Female	1	cv. Santhica 27	Behr et al. (2016)
SRR5209985	Bast Fibres MID	20 days	Female	2	cv. Santhica 27	Behr et al. (2016)
SRR5209986	Bast Fibres MID	20 days	Female	3	cv. Santhica 27	Behr et al. (2016)
SRR5209987	Bast Fibres MID	20 days	Female	4	cv. Santhica 27	Behr et al. (2016)
SRR5209988	Bast Fibres MID	20 days	Female	5	cv. Santhica 27	Behr et al. (2016)
SRR5209989	Bast Fibres BOT	06 days	Female	1	cv. Santhica 27	Behr et al. (2016)
SRR5209990	Bast Fibres BOT	06 days	Female	2	cv. Santhica 27	Behr et al. (2016)
SRR5209991	Bast Fibres BOT	06 days	Female	3	cv. Santhica 27	Behr et al. (2016)
SRR5209992	Bast Fibres BOT	06 days	Female	4	cv. Santhica 27	Behr et al. (2016)
SRR5209993	Bast Fibres BOT	06 days	Female	5	cv. Santhica 27	Behr et al. (2016)
SRR5209994	Bast Fibres BOT	09 days	Female	1	cv. Santhica 27	Behr et al. (2016)
SRR5209995	Bast Fibres BOT	09 days	Female	2	cv. Santhica 27	Behr et al. (2016)
SRR5209996	Bast Fibres BOT	09 days	Female	3	cv. Santhica 27	Behr et al. (2016)
SRR5209997	Bast Fibres BOT	09 days	Female	4	cv. Santhica 27	Behr et al. (2016)
SRR5209998	Bast Fibres BOT	09 days	Female	5	cv. Santhica 27	Behr et al. (2016)
SRR5209999	Bast Fibres BOT	15 days	Female	1	cv. Santhica 27	Behr et al. (2016)
SRR5210000	Bast Fibres BOT	15 days	Female	2	cv. Santhica 27	Behr et al. (2016)
SRR5210001	Bast Fibres BOT	15 days	Female	3	cv. Santhica 27	Behr et al. (2016)
SRR5210002	Bast Fibres BOT	15 days	Female	4	cv. Santhica 27	Behr et al. (2016)
SRR5210003	Bast Fibres BOT	15 days	Female	5	cv. Santhica 27	Behr et al. (2016)
SRR5210004	Bast Fibres BOT	20 days	Female	1	cv. Santhica 27	Behr et al. (2016)
SRR5210005	Bast Fibres BOT	20 days	Female	2	cv. Santhica 27	Behr et al. (2016)
SRR5210006	Bast Fibres BOT	20 days	Female	3	cv. Santhica 27	Behr et al. (2016)
SRR5210007	Bast Fibres BOT	20 days	Female	4	cv. Santhica 27	Behr et al. (2016)
SRR5210008	Bast Fibres BOT	20 days	Female	5	cv. Santhica 27	Behr et al. (2016)
SRR7630400	Trichome (stalked)	7. Mature	Female	3	Finola	Livingston et al. (2020)
SRR7630401	Trichome (bulbous)	7. Mature	Female	3	Finola	Livingston et al. (2020)
SRR7630402	Trichome (sessile)	7. Mature	Female	1	Finola	Livingston et al. (2020)
SRR7630403	Trichome (bulbous)	7. Mature	Female	1	Finola	Livingston et al. (2020)
SRR7630404	Trichome (bulbous)	7. Mature	Female	2	Finola	Livingston et al. (2020)
SRR7630405	Trichome (stalked)	7. Mature	Female	1	Finola	Livingston et al. (2020)
SRR7630406	Trichome (stalked)	7. Mature	Female	2	Finola	Livingston et al. (2020)
SRR7630407	Trichome (sessile)	7. Mature	Female	2	Finola	Livingston et al. (2020)
SRR7630408	Trichome (sessile)	7. Mature	Female	3	Finola	Livingston et al. (2020)
SRR8402452	Seed	27 days	Female	1	X59	University of British Columbia (2019), unpublished
SRR8402453	Seed	20 days	Female	1	X59	University of British Columbia (2019), unpublished
SRR8402454	Seed	10 days	Female	1	X59	University of British Columbia (2019), unpublished

## Sheet: References
Adal, A.M., Doshi, K., Holbrook, L., and Maumoud, S.S. (2021). Comparative RNA-Seq analysis reveals genes associated with masculinization in female Cannabis sativa. Planta 253(17), 1-17.
Behr, M., Legay, S., Žižhová, E., Motyka, V., Dobrev, P.I., Hausman, J-F., Lutts, S., and Guerriero, G. (2016). Studying secondary growth and bast fiber development: The hemp hypocotyl peeks behind the wall. Frontiers in Plant Science 7(1), 1-19.
Braich, S., Baillie, R.C., Jewell, L.S., Spangenberg, G.C., and Cogan, N.O. (2019). Generation of a comprehensive transcriptome atlas and transcriptome dynamics in medicinal cannabis. Scientific Reports 9(1), 1-12.
Busta, L., Dweikat, I., Sato, S.J., Qu, H., Xue, Y., Zhou, B., Gan, L., Yu, B., Clemente, T.E., Cahoon, E.B., and Zhang, C. (2022). Chemical and genetic variation in feral Cannabis sativa populations across the Nebraska climate gradient. Phytochemistry 200(1), 1-10.
Livingston, S.J., Quilichini, T.D., Booth, J.K., Wong, D.C.J., Rensing, K.H., Laflamme-Yonkman, J., Castellarin, S.D., Bohlmann, J., Page, J.E., and Samuels, A.L. (2020). Cannabis gladular trichomes alter morphology and metabolite content during flower maturation. The Plant Journal 101(1), 37-56.
